# Supplementary material for: Inverse halogen dependence in anion 13C NMR
Source: Royal Society of Chemistry journal article supplement (doi:10.1039/d0cp05891b), 2020-12-23
Supplement: d0cp05891b1.pdf [file d0cp05891b1.pdf]

# Inverse halogen dependence in anion $^{13}\text{C}$ NMR

Renan V. Viesser\* and Cláudio F. Tormena\*

Institute of Chemistry, University of Campinas - UNICAMP

P. O. Box 6154, 13083-970, Campinas, São Paulo, Brazil

\*email: renan.viesser@gmail.com

## Contents

|          |                                                                                                                 |           |
|----------|-----------------------------------------------------------------------------------------------------------------|-----------|
| <b>1</b> | <b>Cartesian coordinates</b>                                                                                    | <b>3</b>  |
| <b>2</b> | <b>Geometrical parameters</b>                                                                                   | <b>6</b>  |
| <b>3</b> | <b>DFT benchmark</b>                                                                                            | <b>6</b>  |
| <b>4</b> | <b>Individual contributions of the <math>\sigma^{13}\text{C}</math> NMR</b>                                     | <b>17</b> |
| <b>5</b> | <b>NLMO's contributions to the <math>\sigma^{13}\text{C}</math> NMR</b>                                         | <b>19</b> |
| 5.1      | NLMO's contributions to the $\sigma^{\text{dia}}$ . . . . .                                                     | 20        |
| 5.2      | NLMO's contributions to the $\sigma^{\text{para}}$ . . . . .                                                    | 21        |
| 5.3      | NLMO's contributions to the $\sigma^{\text{SO}}$ . . . . .                                                      | 22        |
| 5.4      | NLMO's contributions to the $\sigma$ . . . . .                                                                  | 23        |
| <b>6</b> | <b>NLMO's contributions to the <math>\sigma^{13}\text{C}</math> NMR in terms of principal axis system (PAS)</b> | <b>24</b> |
| 6.1      | NLMO's contributions to the $\sigma^{\text{dia}}$ . . . . .                                                     | 24        |
| 6.1.1    | Neutral ( $\text{CHX}_3$ ) . . . . .                                                                            | 24        |
| 6.1.2    | Cation ( $\text{CX}_3^+$ ) . . . . .                                                                            | 25        |
| 6.1.3    | Anion ( $\text{CX}_3^-$ ) . . . . .                                                                             | 26        |
| 6.2      | NLMO's contributions to the $\sigma^{\text{para}}$ . . . . .                                                    | 27        |
| 6.2.1    | Neutral ( $\text{CHX}_3$ ) . . . . .                                                                            | 27        |
| 6.2.2    | Cation ( $\text{CX}_3^+$ ) . . . . .                                                                            | 28        |
| 6.2.3    | Anion ( $\text{CX}_3^-$ ) . . . . .                                                                             | 29        |
| 6.3      | NLMO's contributions to the $\sigma^{\text{SO}}$ . . . . .                                                      | 30        |
| 6.3.1    | Neutral ( $\text{CHX}_3$ ) . . . . .                                                                            | 30        |
| 6.3.2    | Cation ( $\text{CX}_3^+$ ) . . . . .                                                                            | 31        |
| 6.3.3    | Anion ( $\text{CX}_3^-$ ) . . . . .                                                                             | 32        |
| 6.4      | NLMO's contributions to the $\sigma$ . . . . .                                                                  | 33        |
| 6.4.1    | Neutral ( $\text{CHX}_3$ ) . . . . .                                                                            | 33        |
| 6.4.2    | Cation ( $\text{CX}_3^+$ ) . . . . .                                                                            | 34        |

|           |                                                                              |           |
|-----------|------------------------------------------------------------------------------|-----------|
| 6.4.3     | Anion ( $CX_3^-$ ) . . . . .                                                 | 35        |
| <b>7</b>  | <b>MO's contributions to the <math>\sigma^{13}C</math> NMR</b>               | <b>36</b> |
| 7.1       | Neutral ( $CHX_3$ ) . . . . .                                                | 36        |
| 7.2       | Cation ( $CX_3^+$ ) . . . . .                                                | 37        |
| 7.3       | Anion ( $CX_3^-$ ) . . . . .                                                 | 38        |
| <b>8</b>  | <b>MSP contributions to the <math>\sigma^{SO}</math> of iodine compounds</b> | <b>39</b> |
| <b>9</b>  | <b>NBO analyses</b>                                                          | <b>40</b> |
| <b>10</b> | <b><math>^{13}C</math> NMR Spectra</b>                                       | <b>42</b> |
|           | <b>References</b>                                                            | <b>43</b> |

# 1 Cartesian coordinates

Optimized geometries were obtained through CCSD theory with aug-cc-pVTZ basis set for all atoms except iodine for which aug-cc-pVTZ-PP was applied. These geometries correspond to energy minima on the potential energy surface and only real frequencies were obtained from the Hessian second order matrix.

## Methane (CH<sub>4</sub>):

|   |             |             |             |
|---|-------------|-------------|-------------|
| C | 0.00000000  | 0.00000000  | 0.00000000  |
| H | 0.00000000  | 1.02612300  | -0.36278900 |
| H | 0.88864900  | -0.51306200 | -0.36278900 |
| H | -0.88864900 | -0.51306200 | -0.36278900 |
| H | 0.00000000  | 0.00000000  | 1.08836800  |

HF Energy: -40.2135973 a.u.

CCSD Energy: -40.4343745 a.u.

## Trifluoromethane (CHF<sub>3</sub>):

|   |             |             |             |
|---|-------------|-------------|-------------|
| C | 0.00000000  | -0.00000000 | 0.00000000  |
| F | 0.00000000  | 1.24623200  | -0.46699400 |
| F | 1.07926800  | -0.62311600 | -0.46699400 |
| F | -1.07926800 | -0.62311600 | -0.46699400 |
| H | 0.00000000  | -0.00000000 | 1.08659700  |

HF Energy: -336.9119876 a.u.

CCSD Energy: -337.8500545 a.u.

## Trifluoromethyl cation (CF<sub>3</sub><sup>+</sup>):

|   |             |             |            |
|---|-------------|-------------|------------|
| C | 0.00000000  | -0.00000000 | 0.00000000 |
| F | 0.00000000  | 1.22901000  | 0.00045000 |
| F | 1.06435400  | -0.61450500 | 0.00045000 |
| F | -1.06435400 | -0.61450500 | 0.00045000 |

HF Energy: -335.948098 a.u.

CCSD Energy: -336.8390365 a.u.

## Trifluoromethyl anion (CF<sub>3</sub><sup>-</sup>):

|   |             |             |             |
|---|-------------|-------------|-------------|
| C | 0.00000000  | -0.00000000 | 0.00000000  |
| F | 0.00000000  | 1.25386600  | -0.66542100 |
| F | 1.08587900  | -0.62693300 | -0.66542100 |
| F | -1.08587900 | -0.62693300 | -0.66542100 |

HF Energy: -336.2776675 a.u.

CCSD Energy: -337.2280157 a.u.

**Trichloromethane (CHCl<sub>3</sub>):**

|    |             |             |             |
|----|-------------|-------------|-------------|
| C  | 0.00000000  | 0.00000000  | 0.00000000  |
| Cl | 0.00000000  | 1.68109500  | -0.54408000 |
| Cl | 1.45587100  | -0.84054700 | -0.54408000 |
| Cl | -1.45587100 | -0.84054700 | -0.54408000 |
| H  | 0.00000000  | 0.00000000  | 1.08009100  |

HF Energy: -1417.0024989 a.u.

CCSD Energy: -1417.8025167 a.u.

**Trichloromethyl cation (CCl<sub>3</sub><sup>+</sup>):**

|    |             |             |             |
|----|-------------|-------------|-------------|
| C  | 0.00000000  | 0.00000000  | 0.00000000  |
| Cl | 0.00000000  | 1.64904300  | -0.00008800 |
| Cl | 1.42811300  | -0.82452200 | -0.00008800 |
| Cl | -1.42811300 | -0.82452200 | -0.00008800 |

HF Energy: -1416.0837818 a.u.

CCSD Energy: -1416.8447435 a.u.

**Trichloromethyl anion (CCl<sub>3</sub><sup>-</sup>):**

|    |             |             |             |
|----|-------------|-------------|-------------|
| C  | 0.00000000  | 0.00000000  | -0.66023000 |
| Cl | 0.00000000  | 1.69895700  | 0.14364500  |
| Cl | 1.47134000  | -0.84947800 | 0.14364500  |
| Cl | -1.47134000 | -0.84947800 | 0.14364500  |

HF Energy: -1416.4083861 a.u.

CCSD Energy: -1417.2122562 a.u.

**Tribromomethane (CHBr<sub>3</sub>):**

|    |             |             |             |
|----|-------------|-------------|-------------|
| C  | 0.00000000  | -0.00000000 | 0.00000000  |
| Br | 0.00000000  | 1.83490200  | -0.56767100 |
| Br | 1.58907200  | -0.91745100 | -0.56767100 |
| Br | -1.58907200 | -0.91745100 | -0.56767100 |
| H  | 0.00000000  | -0.00000000 | 1.07865400  |

HF Energy: -7755.8271134 a.u.

CCSD Energy: -7756.7324983 a.u.

**Tribromomethyl cation (CBr<sub>3</sub><sup>+</sup>):**

|    |            |            |            |
|----|------------|------------|------------|
| C  | 0.00000000 | 0.00000000 | 0.00000000 |
| Br | 0.00000000 | 1.80755100 | 0.00006500 |

|    |             |             |            |
|----|-------------|-------------|------------|
| Br | 1.56538500  | -0.90377500 | 0.00006500 |
| Br | -1.56538500 | -0.90377500 | 0.00006500 |

HF Energy: -7754.912321 a.u.  
CCSD Energy: -7755.7823191 a.u.

**Tribromomethyl anion (CBr<sub>3</sub><sup>-</sup>):**

|    |             |             |             |
|----|-------------|-------------|-------------|
| C  | 0.00000000  | -0.00000000 | 0.00000000  |
| Br | 0.00000000  | 1.85510800  | -0.85124000 |
| Br | 1.60657100  | -0.92755400 | -0.85124000 |
| Br | -1.60657100 | -0.92755400 | -0.85124000 |

HF Energy: -7755.2452733 a.u.  
CCSD Energy: -7756.1510289 a.u.

**Triiodomethane (CHI<sub>3</sub>):**

|   |             |             |             |
|---|-------------|-------------|-------------|
| C | 0.00000000  | -0.00000000 | 0.00000000  |
| I | 0.00000000  | 2.04938400  | -0.58906700 |
| I | 1.77481800  | -1.02469200 | -0.58906700 |
| I | -1.77481800 | -1.02469200 | -0.58906700 |
| H | 0.00000000  | -0.00000000 | 1.07988200  |

HF Energy: -922.4210916 a.u.  
CCSD Energy: -923.2730134 a.u.

**Triiodomethyl cation (CI<sub>3</sub><sup>+</sup>):**

|   |             |             |             |
|---|-------------|-------------|-------------|
| C | 0.00000000  | 0.00000000  | 0.00000000  |
| I | 0.00000000  | 2.02708300  | -0.00002200 |
| I | 1.75550600  | -1.01354200 | -0.00002200 |
| I | -1.75550600 | -1.01354200 | -0.00002200 |

HF Energy: -921.5190798 a.u.  
CCSD Energy: -922.339006 a.u.

**Triiodomethyl anion (CI<sub>3</sub><sup>-</sup>):**

|   |             |             |             |
|---|-------------|-------------|-------------|
| C | 0.00000000  | -0.00000000 | 0.00000000  |
| I | 0.00000000  | 2.06272200  | -0.88670800 |
| I | 1.78637000  | -1.03136100 | -0.88670800 |
| I | -1.78637000 | -1.03136100 | -0.88670800 |

HF Energy: -921.8470881 a.u.  
CCSD Energy: -922.6997852 a.u.

## 2 Geometrical parameters

**Table S1:** Bond lengths (in Å) and bond angles (in °) calculated<sup>a</sup> for CHX<sub>3</sub>, CX<sub>3</sub><sup>+</sup>, and CX<sub>3</sub><sup>-</sup> (X = F, Cl, Br, or I) molecules.

|                    | Neutral (CHX <sub>3</sub> ) |       |       |       | Cation (CX <sub>3</sub> <sup>+</sup> ) |       |       |       | Anion (CX <sub>3</sub> <sup>-</sup> ) |       |       |       |
|--------------------|-----------------------------|-------|-------|-------|----------------------------------------|-------|-------|-------|---------------------------------------|-------|-------|-------|
|                    | F                           | Cl    | Br    | I     | F                                      | Cl    | Br    | I     | F                                     | Cl    | Br    | I     |
| r <sub>C-H</sub>   | 1.087                       | 1.080 | 1.079 | 1.080 | -                                      | -     | -     | -     | -                                     | -     | -     | -     |
| r <sub>C-X</sub>   | 1.331                       | 1.767 | 1.921 | 2.132 | 1.229                                  | 1.649 | 1.807 | 2.027 | 1.419                                 | 1.879 | 2.041 | 2.245 |
| ∠ <sub>H-C-X</sub> | 110.5                       | 107.9 | 107.2 | 106.0 | -                                      | -     | -     | -     | -                                     | -     | -     | -     |
| ∠ <sub>X-C-X</sub> | 108.4                       | 111.0 | 111.6 | 112.7 | 120.0                                  | 120.0 | 120.0 | 120.0 | 99.8                                  | 103.0 | 103.8 | 105.4 |

<sup>a</sup> Calculations were performed through CCSD theory with aug-cc-pVTZ basis set for all atoms except iodine for which aug-cc-pVTZ-PP was applied.

## 3 DFT benchmark

The calibration study was performed for CHX<sub>3</sub> and CX<sub>3</sub><sup>+</sup> compounds to find the level of theory able to reproduce the experimental values. The role of ten different functionals (KT2, OLYP, OPBE, PBE, PW91, B1PW91, B3LYP, OPBE0, and PBE0) and seven basis sets (TZ2P, TZ2P-J, ATZ2P, QZ3P-1D, jcl, QZ4P, and QZ4P-J) was evaluated as well as the inclusion of implicit solvent (COSMO) and terms from DFT exchange-correlation response kernel ( $f_{XC}$ ). The  $\delta^{13}C$  of anions were also calculated in the same levels of theory. The relativistic correction SO-ZORA was applied to all chemical shift calculations. Results are displayed in Tables S2-S11.

GGA functionals (KT2, OLYP, OPBE, PBE, and PW91) show large deviations from experimental values, and no systematic improvement is observed with the increase of the size of basis set. The inclusion of solvent is important to decrease the root mean square deviation (RMSD) for cations, however, the opposite effect is observed for neutral compounds. The effect of  $f_{XC}$  is inconsistent for OLYP, PBE, and PW91 functionals as deviations significantly decrease for bromine and iodine derivatives of CHX<sub>3</sub>, but it increases for CX<sub>3</sub><sup>+</sup>. The  $f_{XC}$  is not implement to be used with KT2 and OPBE in the ADF program.

On the other hand, results from hybrid functionals (B1PW91, B3LYP, OPBE0, and PBE0) show good agreement with the experimental values, mainly the B1PW91, OPBE0, and PBE0. For these functionals, the RMSD is smaller than 10 ppm, which is acceptable for studies of  $\delta^{13}C$  for molecules containing heavy atoms. In general, results obtained with hybrid functionals improve with the increase of the size of basis set, the inclusion of small effects of solvent, and  $f_{XC}$ . The inclusion of  $f_{XC}$  improves the computation of SO contributions for both CHX<sub>3</sub> and CX<sub>3</sub><sup>+</sup> systems, mainly reducing the RMSD when the X is bromine or iodine. The level of theory B1PW91/QZ4P/COSMO/ $f_{XC}$  was chosen for the analysis of shielding mechanisms due to smaller RMSD across the halogen series of both neutral and cations.

Regarding the anions, all levels of theory investigated display an inverse halogen dependency across the series. The main difference between them is the intensity of increased chemical shift for Cl<sub>3</sub><sup>-</sup>, associated with the inclusion of  $f_{XC}$ . The  $f_{XC}$  increases the  $\delta^{13}C$  of Cl<sub>3</sub><sup>-</sup> for both GGA and hybrid functionals.

**Table S2:** Carbon shielding tensor<sup>a</sup> ( $\sigma^{13\text{C}}$ ) calculated for CH<sub>4</sub> reference molecule using different combinations of levels of theory.

| Basis set | Solvent <sup>b</sup> | XC <sup>c</sup> | Functional |        |        |        |        |        |        |        |        |
|-----------|----------------------|-----------------|------------|--------|--------|--------|--------|--------|--------|--------|--------|
|           |                      |                 | KT2        | OLYP   | OPBE   | PBE    | PW91   | B1PW91 | B3LYP  | OPBE0  | PBE0   |
| TZ2P      | isolated             | -               | 200.50     | 197.22 | 200.66 | 195.73 | 195.11 | 196.65 | 193.25 | 201.42 | 197.84 |
|           |                      | $f_{\text{XC}}$ | -          | 197.24 | -      | 195.74 | 195.12 | 196.66 | 193.26 | 201.43 | 197.85 |
|           | COSMO                | -               | 201.29     | 198.01 | 201.54 | 196.57 | 195.94 | 197.51 | 194.02 | 202.31 | 198.70 |
|           |                      | $f_{\text{XC}}$ | -          | 198.02 | -      | 196.58 | 195.95 | 197.52 | 194.04 | 202.32 | 198.71 |
| TZ2P-J    | isolated             | -               | 192.64     | 187.70 | 190.44 | 188.30 | 187.67 | 189.42 | 186.72 | 192.29 | 190.69 |
|           |                      | $f_{\text{XC}}$ | -          | 187.72 | -      | 188.32 | 187.69 | 189.43 | 186.73 | 192.30 | 190.70 |
|           | COSMO                | -               | 193.58     | 188.61 | 191.50 | 189.29 | 188.65 | 190.43 | 187.61 | 193.36 | 191.70 |
|           |                      | $f_{\text{XC}}$ | -          | 188.63 | -      | 189.31 | 188.66 | 190.44 | 187.63 | 193.37 | 191.72 |
| ATZ2P     | isolated             | -               | 196.21     | 193.17 | 197.13 | 191.89 | 191.42 | 194.53 | 190.78 | 199.77 | 195.80 |
|           |                      | $f_{\text{XC}}$ | -          | 192.94 | -      | 191.80 | 191.28 | 194.54 | 190.79 | 199.78 | 195.81 |
|           | COSMO                | -               | 197.06     | 193.97 | 198.08 | 192.79 | 192.30 | 195.51 | 191.65 | 200.79 | 196.78 |
|           |                      | $f_{\text{XC}}$ | -          | 193.74 | -      | 192.70 | 192.17 | 195.52 | 191.66 | 200.80 | 196.79 |
| QZ3P-1D   | isolated             | -               | 195.92     | 190.89 | 193.57 | 191.04 | 190.31 | 191.90 | 189.32 | 195.15 | 193.25 |
|           |                      | $f_{\text{XC}}$ | -          | 190.87 | -      | 191.04 | 190.31 | 191.90 | 189.31 | 195.16 | 193.26 |
|           | COSMO                | -               | 196.73     | 191.67 | 194.49 | 191.90 | 191.16 | 192.66 | 189.98 | 195.94 | 194.00 |
|           |                      | $f_{\text{XC}}$ | -          | 191.65 | -      | 191.90 | 191.15 | 192.67 | 189.97 | 195.94 | 194.00 |
| jcpl      | isolated             | -               | 200.99     | 197.15 | 200.04 | 195.96 | 195.27 | 196.50 | 193.63 | 200.96 | 197.88 |
|           |                      | $f_{\text{XC}}$ | -          | 197.17 | -      | 195.97 | 195.28 | 196.51 | 193.64 | 200.97 | 197.89 |
|           | COSMO                | -               | 201.75     | 197.91 | 200.91 | 196.77 | 196.08 | 197.35 | 194.40 | 201.85 | 198.74 |
|           |                      | $f_{\text{XC}}$ | -          | 197.92 | -      | 196.78 | 196.09 | 197.36 | 194.41 | 201.86 | 198.75 |
| QZ4P      | isolated             | -               | 195.59     | 190.21 | 193.07 | 190.51 | 189.81 | 191.27 | 188.58 | 194.58 | 192.61 |
|           |                      | $f_{\text{XC}}$ | -          | 190.19 | -      | 190.53 | 189.82 | 191.28 | 188.59 | 194.59 | 192.62 |
|           | COSMO                | -               | 196.43     | 191.00 | 194.01 | 191.40 | 190.68 | 192.20 | 189.38 | 195.56 | 193.54 |
|           |                      | $f_{\text{XC}}$ | -          | 190.98 | -      | 191.41 | 190.69 | 192.21 | 189.39 | 195.57 | 193.54 |
| QZ4P-J    | isolated             | -               | 194.51     | 189.60 | 192.37 | 189.79 | 189.13 | 191.00 | 188.10 | 194.54 | 192.28 |
|           |                      | $f_{\text{XC}}$ | -          | 189.62 | -      | 189.82 | 189.15 | 191.01 | 188.11 | 194.55 | 192.29 |
|           | COSMO                | -               | 195.34     | 190.38 | 193.31 | 190.67 | 189.99 | 191.92 | 188.89 | 195.51 | 193.20 |
|           |                      | $f_{\text{XC}}$ | -          | 190.41 | -      | 190.69 | 190.01 | 191.94 | 188.91 | 195.52 | 193.21 |

<sup>a</sup> in ppm. <sup>b</sup> COSMO was applied with parameters for chloroform. <sup>c</sup> Terms from the DFT exchange-correlation response kernel ( $f_{\text{XC}}$ ) were included to improve the spin-orbit (SO) contribution.

**Table S3:** Carbon chemical shifts<sup>a</sup> ( $\delta^{13}\text{C}$ ) and the root mean square deviation (RMSD)<sup>b</sup> calculated for  $\text{CHX}_3$ ,  $\text{CX}_3^+$ , and  $\text{CX}_3^-$  (X = F, Cl, Br, or I) molecules. Calculations were performed combining KT2 functional with different levels of theory.

| Basis set                   | Solvent <sup>c</sup> | Neutral ( $\text{CHX}_3$ ) |       |       |         |       | Cation ( $\text{CX}_3^+$ ) |                     |                     |                    |       | Anion ( $\text{CX}_3^-$ ) |        |        |        |
|-----------------------------|----------------------|----------------------------|-------|-------|---------|-------|----------------------------|---------------------|---------------------|--------------------|-------|---------------------------|--------|--------|--------|
|                             |                      | F                          | Cl    | Br    | I       | RMSD  | F                          | Cl                  | Br                  | I                  | RMSD  | F                         | Cl     | Br     | I      |
| TZ2P                        | isolated             | 119.57                     | 91.96 | 24.53 | -155.51 | 11.05 | 150.78                     | 214.49              | 179.55              | 47.70              | 29.44 | 176.11                    | 194.56 | 214.23 | 236.09 |
|                             | COSMO                | 120.63                     | 92.99 | 27.30 | -147.43 | 13.93 | 150.65                     | 216.35              | 183.19              | 56.95              | 24.56 | 176.57                    | 188.42 | 203.15 | 214.80 |
| TZ2P-J                      | isolated             | 126.90                     | 93.09 | 23.98 | -155.56 | 11.42 | 158.07                     | 219.58              | 185.83              | 61.67              | 21.75 | 174.63                    | 199.91 | 224.08 | 246.95 |
|                             | COSMO                | 128.29                     | 94.40 | 26.98 | -147.41 | 14.55 | 157.91                     | 221.48              | 189.52              | 70.96              | 16.99 | 176.14                    | 194.04 | 212.27 | 223.98 |
| ATZ2P                       | isolated             | 121.88                     | 89.60 | 21.45 | -       | 9.87  | 154.40                     | 209.28              | 172.98              | -                  | 25.17 | 168.91                    | 187.62 | 210.78 | -      |
|                             | COSMO                | 123.09                     | 90.60 | 24.29 | -       | 11.45 | 154.31                     | 211.13              | 176.47              | -                  | 22.94 | 169.12                    | 182.90 | 200.18 | -      |
| QZ3P-1D                     | isolated             | 124.49                     | 95.30 | 28.26 | -       | 15.03 | 155.58                     | 219.50              | 186.22              | -                  | 15.68 | 176.37                    | 197.11 | 222.91 | -      |
|                             | COSMO                | 125.75                     | 96.23 | 31.14 | -       | 16.68 | 155.60                     | 221.37              | 189.93              | -                  | 13.40 | 177.35                    | 191.90 | 211.56 | -      |
| jcpl                        | isolated             | 120.00                     | 92.11 | 25.43 | -155.12 | 11.44 | 151.64                     | 214.37              | 179.88              | 46.48              | 29.88 | 175.74                    | 194.56 | 215.50 | 237.54 |
|                             | COSMO                | 121.03                     | 93.11 | 28.13 | -147.41 | 14.23 | 151.53                     | 216.16              | 183.37              | 55.39              | 25.17 | 176.08                    | 188.41 | 204.26 | 216.26 |
| QZ4P                        | isolated             | 125.61                     | 95.84 | 25.80 | -152.18 | 13.38 | 155.56                     | 221.97              | 187.80              | 64.87              | 19.40 | 177.38                    | 197.40 | 222.67 | 244.52 |
|                             | COSMO                | 126.89                     | 96.88 | 28.78 | -144.28 | 16.51 | 155.40                     | 223.88              | 191.57              | 73.96              | 14.64 | 178.40                    | 192.51 | 211.22 | 222.66 |
| QZ4P-J                      | isolated             | 125.27                     | 94.67 | 25.32 | -153.86 | 12.51 | 157.01                     | 221.06              | 187.71              | 64.05              | 20.01 | 176.62                    | 198.02 | 222.95 | 245.38 |
|                             | COSMO                | 126.52                     | 95.66 | 28.26 | -146.16 | 15.47 | 156.87                     | 222.91              | 191.39              | 72.76              | 15.46 | 177.54                    | 192.97 | 211.61 | 223.70 |
| Experimental <sup>d,e</sup> |                      | 122.20 <sup>f</sup>        | 77.22 | 9.67  | -162.08 | -     | 150.70 <sup>g</sup>        | 236.30 <sup>g</sup> | 207.00 <sup>g</sup> | 95.00 <sup>g</sup> | -     | 175.00 <sup>f</sup>       | -      | -      | -      |

<sup>a</sup> in ppm. <sup>b</sup> Estimated by the deviation between theoretical and experimental values. <sup>c</sup> COSMO was applied with parameters for chloroform. <sup>d</sup> Experimental  $\delta^{13}\text{C}$  for  $\text{CH}_4$  is equal to -8.65 ppm.<sup>1</sup> <sup>e</sup> Error = 0.01 ppm. <sup>f</sup> Reference 2. <sup>g</sup> Reference 3.



**Table S4:** Carbon chemical shifts<sup>a</sup> ( $\delta^{13}\text{C}$ ) and the root mean square deviation (RMSD)<sup>b</sup> calculated for  $\text{CHX}_3$ ,  $\text{CX}_3^+$ , and  $\text{CX}_3^-$  ( $X = \text{F, Cl, Br, or I}$ ) molecules. Calculations were performed combining OLYP functional with different levels of theory.

| Basis set                   | Solvent <sup>c</sup> | XC <sup>d</sup> | Neutral ( $\text{CHX}_3$ ) |       |       |         |       | Cation ( $\text{CX}_3^+$ ) |                     |                     |                    |       | Anion ( $\text{CX}_3^-$ ) |        |        |        |
|-----------------------------|----------------------|-----------------|----------------------------|-------|-------|---------|-------|----------------------------|---------------------|---------------------|--------------------|-------|---------------------------|--------|--------|--------|
|                             |                      |                 | F                          | Cl    | Br    | I       | RMSD  | F                          | Cl                  | Br                  | I                  | RMSD  | F                         | Cl     | Br     | I      |
| TZ2P                        | isolated             | -               | 122.34                     | 96.56 | 33.61 | -133.63 | 20.96 | 154.21                     | 222.70              | 193.98              | 78.34              | 12.69 | 182.50                    | 203.01 | 221.20 | 237.55 |
|                             |                      | $f_{\text{XC}}$ | 122.10                     | 93.93 | 17.15 | -166.70 | 9.44  | 153.48                     | 216.64              | 157.18              | -0.98              | 54.97 | 182.08                    | 204.83 | 240.65 | 361.63 |
|                             | COSMO                | -               | 123.44                     | 97.59 | 36.15 | -126.47 | 24.42 | 154.18                     | 224.61              | 197.68              | 87.41              | 8.56  | 183.02                    | 196.18 | 208.94 | 212.95 |
|                             |                      | $f_{\text{XC}}$ | 123.18                     | 95.02 | 20.08 | -160.93 | 10.34 | 153.46                     | 218.54              | 161.00              | 7.11               | 50.41 | 182.60                    | 197.56 | 225.66 | 322.10 |
| TZ2P-J                      | isolated             | -               | 127.67                     | 95.42 | 31.02 | -134.08 | 20.01 | 159.00                     | 224.31              | 196.36              | 89.02              | 9.51  | 178.31                    | 205.31 | 228.30 | 246.15 |
|                             |                      | $f_{\text{XC}}$ | 127.46                     | 93.00 | 15.98 | -163.26 | 8.91  | 158.37                     | 218.74              | 162.42              | 15.54              | 46.55 | 177.93                    | 207.37 | 248.55 | 370.93 |
|                             | COSMO                | -               | 129.03                     | 96.69 | 33.81 | -126.74 | 23.76 | 158.88                     | 226.24              | 200.09              | 98.20              | 7.52  | 179.73                    | 198.76 | 215.38 | 219.99 |
|                             |                      | $f_{\text{XC}}$ | 128.82                     | 94.33 | 19.13 | -157.41 | 10.58 | 158.26                     | 220.66              | 166.27              | 23.62              | 42.00 | 179.37                    | 200.38 | 232.91 | 330.25 |
| ATZ2P                       | isolated             | -               | 125.72                     | 94.07 | 30.59 | -       | 15.64 | 158.30                     | 217.47              | 187.75              | -                  | 16.15 | 175.77                    | 194.68 | 217.61 | -      |
|                             |                      | $f_{\text{XC}}$ | 125.13                     | 91.01 | 11.42 | -       | 8.20  | 157.01                     | 210.92              | 151.64              | -                  | 35.35 | 176.43                    | 197.58 | 237.47 | -      |
|                             | COSMO                | -               | 126.90                     | 95.12 | 33.32 | -       | 17.34 | 158.23                     | 219.31              | 191.20              | -                  | 14.08 | 175.86                    | 189.48 | 205.97 | -      |
|                             |                      | $f_{\text{XC}}$ | 126.31                     | 92.11 | 14.52 | -       | 9.35  | 156.93                     | 212.75              | 155.16              | -                  | 33.07 | 175.56                    | 190.89 | 221.89 | -      |
| QZ3P-1D                     | isolated             | -               | 126.30                     | 98.35 | 36.78 | -       | 19.99 | 157.73                     | 225.72              | 198.34              | -                  | 8.88  | 182.02                    | 203.74 | 229.20 | -      |
|                             |                      | $f_{\text{XC}}$ | 126.04                     | 93.49 | 11.60 | -       | 9.72  | 157.02                     | 214.47              | 143.78              | -                  | 38.79 | 183.15                    | 201.68 | 249.39 | -      |
|                             | COSMO                | -               | 127.53                     | 99.37 | 39.64 | -       | 21.74 | 157.74                     | 227.65              | 202.07              | -                  | 7.04  | 182.64                    | 198.11 | 216.72 | -      |
|                             |                      | $f_{\text{XC}}$ | 127.26                     | 94.57 | 14.82 | -       | 10.85 | 157.05                     | 215.86              | 146.29              | -                  | 37.17 | 182.49                    | 196.39 | 231.27 | -      |
| jcpl                        | isolated             | -               | 122.25                     | 96.01 | 33.85 | -133.11 | 21.08 | 154.54                     | 221.98              | 193.67              | 77.26              | 13.34 | 181.35                    | 202.11 | 221.52 | 237.59 |
|                             |                      | $f_{\text{XC}}$ | 122.05                     | 93.76 | 19.51 | -160.49 | 9.66  | 153.96                     | 216.72              | 161.25              | 5.05               | 51.42 | 180.99                    | 204.18 | 241.86 | 361.14 |
|                             | COSMO                | -               | 123.31                     | 97.02 | 36.35 | -126.27 | 24.43 | 154.52                     | 223.81              | 197.23              | 86.05              | 9.30  | 181.83                    | 195.28 | 209.11 | 213.00 |
|                             |                      | $f_{\text{XC}}$ | 123.10                     | 94.82 | 22.35 | -155.13 | 11.40 | 153.94                     | 218.55              | 164.91              | 12.83              | 47.03 | 181.47                    | 196.91 | 226.69 | 322.25 |
| QZ4P                        | isolated             | -               | 126.43                     | 98.34 | 33.74 | -129.34 | 23.00 | 156.77                     | 227.18              | 199.89              | 94.59              | 6.53  | 181.26                    | 202.56 | 227.95 | 243.99 |
|                             |                      | $f_{\text{XC}}$ | 126.25                     | 96.20 | 20.82 | -156.62 | 11.52 | 156.20                     | 222.14              | 169.87              | 27.39              | 39.31 | 181.17                    | 203.38 | 247.34 | 358.17 |
|                             | COSMO                | -               | 127.66                     | 99.44 | 36.65 | -121.87 | 26.78 | 156.61                     | 229.15              | 203.69              | 103.61             | 6.54  | 182.38                    | 197.40 | 215.42 | 219.55 |
|                             |                      | $f_{\text{XC}}$ | 127.48                     | 97.34 | 24.05 | -151.29 | 13.75 | 156.05                     | 224.10              | 173.66              | 34.29              | 35.27 | 182.22                    | 198.68 | 232.78 | 323.87 |
| QZ4P-J                      | isolated             | -               | 126.18                     | 96.73 | 32.71 | -132.10 | 21.37 | 158.27                     | 226.15              | 199.15              | 92.30              | 7.57  | 180.53                    | 202.59 | 227.38 | 244.03 |
|                             |                      | $f_{\text{XC}}$ | 125.98                     | 94.31 | 18.56 | -163.25 | 9.83  | 157.64                     | 220.57              | 166.84              | 19.73              | 43.51 | 180.23                    | 203.21 | 247.39 | 360.53 |
|                             | COSMO                | -               | 127.39                     | 97.78 | 35.59 | -124.82 | 25.05 | 158.11                     | 228.03              | 202.83              | 100.99             | 6.64  | 181.57                    | 197.21 | 214.90 | 219.63 |
|                             |                      | $f_{\text{XC}}$ | 127.21                     | 95.40 | 21.80 | -158.17 | 11.38 | 157.51                     | 222.45              | 170.55              | 26.20              | 39.69 | 181.27                    | 198.41 | 232.61 | 326.25 |
| Experimental <sup>e,f</sup> |                      |                 | 122.20 <sup>g</sup>        | 77.22 | 9.67  | -162.08 | -     | 150.70 <sup>h</sup>        | 236.30 <sup>h</sup> | 207.00 <sup>h</sup> | 95.00 <sup>h</sup> | -     | 175.00 <sup>g</sup>       | -      | -      | -      |

<sup>a</sup> in ppm. <sup>b</sup> Estimated by the deviation between theoretical and experimental values. <sup>c</sup> COSMO was applied with parameters for chloroform. <sup>d</sup> Terms from the DFT exchange-correlation response kernel ( $f_{\text{XC}}$ ) were included to improve the spin-orbit (SO) contribution. <sup>e</sup> Experimental  $\delta^{13}\text{C}$  for  $\text{CH}_4$  is equal to -8.65 ppm. <sup>f</sup> Error = 0.01 ppm. <sup>g</sup> Reference 2. <sup>h</sup> Reference 3.

**Table S5:** Carbon chemical shifts<sup>a</sup> ( $\delta^{13}\text{C}$ ) and the root mean square deviation (RMSD)<sup>b</sup> calculated for  $\text{CHX}_3$ ,  $\text{CX}_3^+$ , and  $\text{CX}_3^-$  (X = F, Cl, Br, or I) molecules. Calculations were performed combining OPBE functional with different levels of theory.

| Basis set                   | Solvent <sup>c</sup> | Neutral ( $\text{CHX}_3$ ) |       |       |         |       | Cation ( $\text{CX}_3^+$ ) |                     |                     |                    |       | Anion ( $\text{CX}_3^-$ ) |        |        |        |
|-----------------------------|----------------------|----------------------------|-------|-------|---------|-------|----------------------------|---------------------|---------------------|--------------------|-------|---------------------------|--------|--------|--------|
|                             |                      | F                          | Cl    | Br    | I       | RMSD  | F                          | Cl                  | Br                  | I                  | RMSD  | F                         | Cl     | Br     | I      |
| TZ2P                        | isolated             | 120.17                     | 93.66 | 34.09 | -125.99 | 23.31 | 151.81                     | 215.52              | 187.35              | 72.70              | 18.14 | 178.24                    | 192.93 | 208.67 | 222.21 |
|                             | COSMO                | 121.37                     | 94.75 | 36.43 | -119.52 | 26.62 | 151.94                     | 217.48              | 190.94              | 81.34              | 14.14 | 178.53                    | 186.77 | 197.48 | 199.64 |
| TZ2P-J                      | isolated             | 126.28                     | 92.89 | 31.57 | -126.30 | 22.48 | 157.29                     | 217.63              | 190.03              | 84.03              | 14.14 | 175.22                    | 196.16 | 215.53 | 229.91 |
|                             | COSMO                | 127.82                     | 94.28 | 34.19 | -119.66 | 26.09 | 157.42                     | 219.67              | 193.72              | 92.83              | 11.21 | 176.54                    | 190.29 | 203.76 | 205.93 |
| ATZ2P                       | isolated             | 124.21                     | 91.83 | 32.06 | -       | 15.48 | 156.71                     | 210.88              | 181.94              | -                  | 20.90 | 172.39                    | 186.27 | 206.02 | -      |
|                             | COSMO                | 125.57                     | 92.96 | 34.63 | -       | 17.15 | 156.85                     | 212.83              | 185.40              | -                  | 18.75 | 172.42                    | 181.52 | 195.32 | -      |
| QZ3P-1D                     | isolated             | 124.68                     | 95.87 | 37.96 | -       | 19.62 | 155.87                     | 219.35              | 192.09              | -                  | 13.37 | 178.61                    | 195.56 | 217.40 | -      |
|                             | COSMO                | 126.07                     | 96.98 | 40.63 | -       | 21.32 | 156.09                     | 221.41              | 195.83              | -                  | 11.19 | 179.23                    | 190.28 | 205.84 | -      |
| jcpl                        | isolated             | 119.38                     | 92.61 | 34.15 | -125.32 | 23.43 | 151.55                     | 214.09              | 186.57              | 71.44              | 19.15 | 176.34                    | 191.20 | 207.98 | 221.08 |
|                             | COSMO                | 120.56                     | 93.71 | 36.47 | -119.18 | 26.61 | 151.70                     | 216.01              | 190.05              | 79.81              | 15.25 | 176.62                    | 185.08 | 196.73 | 198.68 |
| QZ4P                        | isolated             | 124.72                     | 95.97 | 34.84 | -120.75 | 25.98 | 154.48                     | 220.82              | 193.78              | 89.95              | 10.66 | 177.68                    | 193.84 | 215.75 | 227.67 |
|                             | COSMO                | 126.13                     | 97.16 | 37.58 | -113.95 | 29.62 | 154.56                     | 222.90              | 197.55              | 98.54              | 8.61  | 178.70                    | 189.08 | 204.20 | 205.37 |
| QZ4P-J                      | isolated             | 124.48                     | 94.18 | 33.60 | -123.65 | 24.20 | 156.14                     | 219.43              | 192.91              | 87.78              | 11.88 | 176.97                    | 193.68 | 215.06 | 227.59 |
|                             | COSMO                | 125.70                     | 95.32 | 36.32 | -117.03 | 27.75 | 156.23                     | 221.46              | 196.61              | 96.08              | 9.49  | 177.93                    | 188.73 | 203.57 | 205.34 |
| Experimental <sup>d,e</sup> |                      | 122.20 <sup>f</sup>        | 77.22 | 9.67  | -162.08 | -     | 150.70 <sup>g</sup>        | 236.30 <sup>g</sup> | 207.00 <sup>g</sup> | 95.00 <sup>g</sup> | -     | 175.00 <sup>f</sup>       | -      | -      | -      |

<sup>a</sup> in ppm. <sup>b</sup> Estimated by the deviation between theoretical and experimental values. <sup>c</sup> COSMO was applied with parameters for chloroform. <sup>d</sup> Experimental  $\delta^{13}\text{C}$  for  $\text{CH}_4$  is equal to -8.65 ppm.<sup>1</sup> <sup>e</sup> Error = 0.01 ppm. <sup>f</sup> Reference 2. <sup>g</sup> Reference 3.

**Table S6:** Carbon chemical shifts<sup>a</sup> ( $\delta^{13}\text{C}$ ) and the root mean square deviation (RMSD)<sup>b</sup> calculated for  $\text{CHX}_3$ ,  $\text{CX}_3^+$ , and  $\text{CX}_3^-$  (X = F, Cl, Br, or I) molecules. Calculations were performed combining PBE functional with different levels of theory.

| Basis set                   | Solvent <sup>c</sup> | XC <sup>d</sup> | Neutral ( $\text{CHX}_3$ ) |        |       |         |       | Cation ( $\text{CX}_3^+$ ) |                     |                     |                    |       | Anion ( $\text{CX}_3^-$ ) |        |        |        |
|-----------------------------|----------------------|-----------------|----------------------------|--------|-------|---------|-------|----------------------------|---------------------|---------------------|--------------------|-------|---------------------------|--------|--------|--------|
|                             |                      |                 | F                          | Cl     | Br    | I       | RMSD  | F                          | Cl                  | Br                  | I                  | RMSD  | F                         | Cl     | Br     | I      |
| TZ2P                        | isolated             | -               | 126.59                     | 97.93  | 31.78 | -145.63 | 17.38 | 159.62                     | 230.70              | 200.65              | 77.71              | 10.61 | 191.17                    | 210.11 | 229.41 | 247.90 |
|                             |                      | $f_{\text{XC}}$ | 126.40                     | 96.02  | 20.09 | -170.98 | 11.82 | 159.12                     | 226.70              | 177.37              | 29.36              | 36.57 | 190.84                    | 211.28 | 241.98 | 322.04 |
|                             | COSMO                | -               | 127.74                     | 99.00  | 34.41 | -138.14 | 20.56 | 159.58                     | 232.75              | 204.48              | 86.86              | 6.40  | 191.50                    | 202.18 | 215.20 | 219.73 |
|                             |                      | $f_{\text{XC}}$ | 127.56                     | 97.14  | 23.05 | -163.90 | 12.33 | 159.10                     | 228.76              | 181.36              | 38.29              | 31.63 | 191.19                    | 203.05 | 225.95 | 286.39 |
| TZ2P-J                      | isolated             | -               | 132.57                     | 97.60  | 29.56 | -147.47 | 16.82 | 165.42                     | 232.82              | 203.15              | 86.82              | 8.81  | 187.35                    | 212.96 | 236.72 | 256.42 |
|                             |                      | $f_{\text{XC}}$ | 132.40                     | 95.77  | 18.47 | -170.90 | 12.28 | 164.97                     | 228.96              | 180.61              | 39.70              | 31.67 | 187.05                    | 214.21 | 249.26 | 329.24 |
|                             | COSMO                | -               | 134.04                     | 98.95  | 32.46 | -139.78 | 20.18 | 165.35                     | 234.90              | 207.01              | 96.03              | 7.38  | 188.70                    | 205.35 | 221.80 | 226.59 |
|                             |                      | $f_{\text{XC}}$ | 133.88                     | 97.17  | 21.68 | -163.72 | 13.05 | 164.91                     | 231.05              | 184.63              | 48.59              | 26.85 | 188.42                    | 206.29 | 232.53 | 292.19 |
| ATZ2P                       | isolated             | -               | 130.33                     | 95.81  | 29.06 | -       | 16.20 | 164.38                     | 225.82              | 194.49              | -                  | 12.29 | 184.20                    | 202.23 | 225.75 | -      |
|                             |                      | $f_{\text{XC}}$ | 129.95                     | 93.69  | 16.51 | -       | 11.23 | 163.58                     | 221.60              | 171.77              | -                  | 23.26 | 184.25                    | 203.80 | 238.01 | -      |
|                             | COSMO                | -               | 131.62                     | 96.87  | 31.82 | -       | 17.94 | 164.38                     | 227.83              | 198.15              | -                  | 10.60 | 184.23                    | 196.30 | 212.39 | -      |
|                             |                      | $f_{\text{XC}}$ | 131.24                     | 94.79  | 19.57 | -       | 12.76 | 163.57                     | 223.62              | 175.55              | -                  | 20.94 | 183.95                    | 197.11 | 222.33 | -      |
| QZ3P-1D                     | isolated             | -               | 130.67                     | 99.95  | 34.83 | -       | 20.18 | 163.46                     | 233.82              | 205.75              | -                  | 7.54  | 189.73                    | 210.09 | 236.30 | -      |
|                             |                      | $f_{\text{XC}}$ | 130.46                     | 97.14  | 19.03 | -       | 13.57 | 162.96                     | 227.90              | 175.52              | -                  | 20.10 | 189.76                    | 209.49 | 247.65 | -      |
|                             | COSMO                | -               | 132.01                     | 100.94 | 37.67 | -       | 21.93 | 163.54                     | 235.86              | 209.66              | -                  | 7.57  | 190.53                    | 203.70 | 222.17 | -      |
|                             |                      | $f_{\text{XC}}$ | 131.80                     | 98.17  | 22.14 | -       | 15.13 | 163.05                     | 229.71              | 179.27              | -                  | 17.93 | 190.33                    | 203.12 | 230.98 | -      |
| jcpl                        | isolated             | -               | 126.71                     | 97.75  | 32.26 | -145.74 | 17.46 | 160.20                     | 230.29              | 200.53              | 75.93              | 11.53 | 190.44                    | 209.67 | 230.26 | 248.82 |
|                             |                      | $f_{\text{XC}}$ | 126.55                     | 96.05  | 21.76 | -167.77 | 11.75 | 159.78                     | 226.68              | 179.27              | 30.19              | 35.86 | 190.14                    | 210.96 | 243.02 | 321.69 |
|                             | COSMO                | -               | 127.84                     | 98.79  | 34.84 | -138.58 | 20.51 | 160.18                     | 232.26              | 204.22              | 84.79              | 7.39  | 190.69                    | 201.73 | 215.86 | 220.61 |
|                             |                      | $f_{\text{XC}}$ | 127.67                     | 97.14  | 24.63 | -161.12 | 12.76 | 159.77                     | 228.68              | 183.11              | 38.78              | 31.11 | 190.40                    | 202.71 | 226.78 | 286.27 |
| QZ4P                        | isolated             | -               | 131.41                     | 100.43 | 31.78 | -143.77 | 19.02 | 163.27                     | 235.83              | 206.52              | 91.53              | 6.53  | 190.71                    | 210.42 | 236.14 | 254.57 |
|                             |                      | $f_{\text{XC}}$ | 131.28                     | 98.77  | 21.67 | -166.05 | 13.29 | 162.87                     | 232.27              | 185.77              | 48.38              | 26.40 | 190.57                    | 211.14 | 247.99 | 321.88 |
|                             | COSMO                | -               | 132.77                     | 101.54 | 34.73 | -136.16 | 22.38 | 163.21                     | 237.93              | 210.48              | 100.63             | 7.12  | 191.61                    | 204.34 | 221.73 | 226.36 |
|                             |                      | $f_{\text{XC}}$ | 132.63                     | 99.91  | 24.89 | -159.40 | 14.68 | 162.81                     | 234.36              | 189.83              | 56.47              | 21.96 | 191.45                    | 205.19 | 232.33 | 289.19 |
| QZ4P-J                      | isolated             | -               | 131.08                     | 98.89  | 30.77 | -146.03 | 17.69 | 164.46                     | 234.39              | 205.33              | 89.52              | 7.51  | 189.33                    | 209.96 | 235.23 | 254.11 |
|                             |                      | $f_{\text{XC}}$ | 130.92                     | 97.04  | 20.05 | -170.29 | 12.69 | 164.02                     | 230.54              | 183.58              | 43.70              | 29.12 | 189.07                    | 210.59 | 247.54 | 323.14 |
|                             | COSMO                | -               | 132.41                     | 99.94  | 33.68 | -138.62 | 20.90 | 164.41                     | 236.42              | 209.20              | 98.26              | 7.13  | 190.15                    | 203.75 | 220.98 | 226.19 |
|                             |                      | $f_{\text{XC}}$ | 132.25                     | 98.13  | 23.26 | -163.83 | 13.47 | 163.97                     | 232.57              | 187.56              | 51.39              | 24.85 | 189.89                    | 204.55 | 231.92 | 290.79 |
| Experimental <sup>e,f</sup> |                      |                 | 122.20 <sup>g</sup>        | 77.22  | 9.67  | -162.08 | -     | 150.70 <sup>h</sup>        | 236.30 <sup>h</sup> | 207.00 <sup>h</sup> | 95.00 <sup>h</sup> | -     | 175.00 <sup>g</sup>       | -      | -      | -      |

<sup>a</sup> in ppm. <sup>b</sup> Estimated by the deviation between theoretical and experimental values. <sup>c</sup> COSMO was applied with parameters for chloroform. <sup>d</sup> Terms from the DFT exchange-correlation response kernel ( $f_{\text{XC}}$ ) were included to improve the spin-orbit (SO) contribution. <sup>e</sup> Experimental  $\delta^{13}\text{C}$  for  $\text{CH}_4$  is equal to -8.65 ppm. <sup>f</sup> Error = 0.01 ppm. <sup>g</sup> Reference 2. <sup>h</sup> Reference 3.

**Table S7:** Carbon chemical shifts<sup>a</sup> ( $\delta^{13}\text{C}$ ) and the root mean square deviation (RMSD)<sup>b</sup> calculated for  $\text{CHX}_3$ ,  $\text{CX}_3^+$ , and  $\text{CX}_3^-$  ( $\text{X} = \text{F}, \text{Cl}, \text{Br}, \text{or I}$ ) molecules. Calculations were performed combining PW91 functional with different levels of theory.

| Basis set                   | Solvent <sup>c</sup> | XC <sup>d</sup> | Neutral ( $\text{CHX}_3$ ) |        |       |         |       | Cation ( $\text{CX}_3^+$ ) |                     |                     |                    |       | Anion ( $\text{CX}_3^-$ ) |        |        |        |
|-----------------------------|----------------------|-----------------|----------------------------|--------|-------|---------|-------|----------------------------|---------------------|---------------------|--------------------|-------|---------------------------|--------|--------|--------|
|                             |                      |                 | F                          | Cl     | Br    | I       | RMSD  | F                          | Cl                  | Br                  | I                  | RMSD  | F                         | Cl     | Br     | I      |
| TZ2P                        | isolated             | -               | 127.19                     | 98.81  | 31.98 | -146.89 | 17.46 | 160.22                     | 232.49              | 202.00              | 78.50              | 10.03 | 192.13                    | 212.38 | 232.46 | 251.71 |
|                             |                      | $f_{\text{XC}}$ | 126.98                     | 96.64  | 18.74 | -175.20 | 12.79 | 159.66                     | 227.96              | 175.61              | 23.89              | 39.34 | 191.75                    | 213.56 | 245.63 | 331.82 |
|                             | COSMO                | -               | 128.33                     | 99.88  | 34.65 | -139.40 | 20.55 | 160.15                     | 234.52              | 205.84              | 87.66              | 6.08  | 192.51                    | 204.41 | 218.20 | 223.47 |
|                             |                      | $f_{\text{XC}}$ | 128.12                     | 97.76  | 21.76 | -168.25 | 12.66 | 159.59                     | 230.00              | 179.62              | 32.71              | 34.45 | 192.15                    | 205.25 | 229.39 | 295.33 |
| TZ2P-J                      | isolated             | -               | 132.99                     | 98.37  | 29.59 | -149.01 | 16.82 | 165.93                     | 234.52              | 204.40              | 87.34              | 8.67  | 188.30                    | 215.21 | 239.85 | 260.51 |
|                             |                      | $f_{\text{XC}}$ | 132.81                     | 96.34  | 17.29 | -174.47 | 13.13 | 165.44                     | 230.28              | 179.53              | 35.73              | 33.62 | 187.97                    | 216.55 | 253.48 | 341.08 |
|                             | COSMO                | -               | 134.45                     | 99.72  | 32.53 | -141.31 | 20.06 | 165.83                     | 236.59              | 208.26              | 96.56              | 7.63  | 189.70                    | 207.56 | 224.87 | 230.61 |
|                             |                      | $f_{\text{XC}}$ | 134.26                     | 97.73  | 20.55 | -167.43 | 13.35 | 165.34                     | 232.34              | 183.55              | 44.49              | 28.86 | 189.37                    | 208.54 | 236.51 | 303.12 |
| ATZ2P                       | isolated             | -               | 131.20                     | 96.82  | 29.36 | -       | 16.86 | 165.29                     | 227.91              | 196.14              | -                  | 11.56 | 185.55                    | 204.63 | 229.10 | -      |
|                             |                      | $f_{\text{XC}}$ | 130.75                     | 94.40  | 15.12 | -       | 11.52 | 164.35                     | 223.10              | 170.42              | -                  | 23.80 | 185.57                    | 206.17 | 241.74 | -      |
|                             | COSMO                | -               | 132.47                     | 97.87  | 32.15 | -       | 18.59 | 165.24                     | 229.90              | 199.78              | -                  | 10.07 | 185.62                    | 198.66 | 215.63 | -      |
|                             |                      | $f_{\text{XC}}$ | 132.02                     | 95.51  | 18.24 | -       | 12.97 | 164.31                     | 225.11              | 174.22              | -                  | 21.49 | 185.26                    | 199.38 | 225.78 | -      |
| QZ3P-1D                     | isolated             | -               | 131.12                     | 100.47 | 34.75 | -       | 20.41 | 163.98                     | 235.31              | 206.81              | -                  | 7.69  | 190.80                    | 212.25 | 239.49 | -      |
|                             |                      | $f_{\text{XC}}$ | 130.89                     | 97.33  | 17.33 | -       | 13.40 | 163.42                     | 228.41              | 172.22              | -                  | 21.86 | 190.79                    | 211.14 | 253.16 | -      |
|                             | COSMO                | -               | 132.45                     | 101.48 | 37.64 | -       | 22.18 | 164.03                     | 237.33              | 210.68              | -                  | 8.01  | 191.49                    | 205.76 | 225.17 | -      |
|                             |                      | $f_{\text{XC}}$ | 132.21                     | 98.36  | 20.49 | -       | 14.88 | 163.48                     | 230.11              | 175.65              | -                  | 19.87 | 191.25                    | 204.96 | 234.94 | -      |
| jcpl                        | isolated             | -               | 127.29                     | 98.59  | 32.32 | -147.30 | 17.42 | 160.81                     | 232.12              | 201.87              | 76.51              | 11.04 | 191.49                    | 212.05 | 233.45 | 252.94 |
|                             |                      | $f_{\text{XC}}$ | 127.12                     | 96.71  | 20.63 | -171.29 | 12.34 | 160.35                     | 228.13              | 178.23              | 26.00              | 37.91 | 191.14                    | 213.41 | 247.17 | 332.92 |
|                             | COSMO                | -               | 128.42                     | 99.65  | 34.95 | -140.12 | 20.39 | 160.77                     | 234.09              | 205.57              | 85.39              | 7.08  | 191.79                    | 204.06 | 218.98 | 224.61 |
|                             |                      | $f_{\text{XC}}$ | 128.24                     | 97.81  | 23.58 | -164.76 | 12.86 | 160.32                     | 230.11              | 182.09              | 34.49              | 33.21 | 191.46                    | 205.08 | 230.70 | 296.63 |
| QZ4P                        | isolated             | -               | 131.88                     | 101.07 | 31.69 | -145.58 | 18.84 | 163.84                     | 237.54              | 207.67              | 91.85              | 6.79  | 191.68                    | 212.56 | 239.36 | 258.81 |
|                             |                      | $f_{\text{XC}}$ | 131.74                     | 99.28  | 20.79 | -168.83 | 13.66 | 163.41                     | 233.71              | 185.39              | 45.82              | 27.63 | 191.50                    | 213.27 | 252.63 | 333.62 |
|                             | COSMO                | -               | 133.21                     | 102.18 | 34.66 | -137.96 | 22.08 | 163.73                     | 239.62              | 211.64              | 100.96             | 7.71  | 192.60                    | 206.45 | 224.84 | 230.50 |
|                             |                      | $f_{\text{XC}}$ | 133.07                     | 100.43 | 24.07 | -162.37 | 14.70 | 163.31                     | 235.80              | 189.44              | 53.78              | 23.27 | 192.43                    | 207.39 | 236.74 | 300.64 |
| QZ4P-J                      | isolated             | -               | 131.55                     | 99.60  | 30.72 | -147.73 | 17.59 | 165.02                     | 236.05              | 206.50              | 89.91              | 7.60  | 190.26                    | 212.10 | 238.40 | 258.31 |
|                             |                      | $f_{\text{XC}}$ | 131.38                     | 97.54  | 18.80 | -174.19 | 13.48 | 164.52                     | 231.80              | 182.52              | 39.49              | 31.19 | 189.93                    | 212.64 | 251.89 | 334.15 |
|                             | COSMO                | -               | 132.87                     | 100.65 | 33.66 | -140.33 | 20.68 | 164.92                     | 238.05              | 210.36              | 98.63              | 7.58  | 191.15                    | 205.86 | 224.03 | 230.26 |
|                             |                      | $f_{\text{XC}}$ | 132.70                     | 98.63  | 22.08 | -167.94 | 13.76 | 164.44                     | 233.80              | 186.47              | 47.02              | 27.01 | 190.85                    | 206.67 | 235.99 | 301.45 |
| Experimental <sup>e,f</sup> |                      |                 | 122.20 <sup>g</sup>        | 77.22  | 9.67  | -162.08 | -     | 150.70 <sup>h</sup>        | 236.30 <sup>h</sup> | 207.00 <sup>h</sup> | 95.00 <sup>h</sup> | -     | 175.00 <sup>g</sup>       | -      | -      | -      |

<sup>a</sup> in ppm. <sup>b</sup> Estimated by the deviation between theoretical and experimental values. <sup>c</sup> COSMO was applied with parameters for chloroform. <sup>d</sup> Terms from the DFT exchange-correlation response kernel ( $f_{\text{XC}}$ ) were included to improve the spin-orbit (SO) contribution. <sup>e</sup> Experimental  $\delta^{13}\text{C}$  for  $\text{CH}_4$  is equal to -8.65 ppm. <sup>f</sup> Error = 0.01 ppm. <sup>g</sup> Reference 2. <sup>h</sup> Reference 3.

**Table S8:** Carbon chemical shifts<sup>a</sup> ( $\delta^{13}\text{C}$ ) and the root mean square deviation (RMSD)<sup>b</sup> calculated for  $\text{CHX}_3$ ,  $\text{CX}_3^+$ , and  $\text{CX}_3^-$  ( $\text{X} = \text{F}, \text{Cl}, \text{Br}, \text{or I}$ ) molecules. Calculations were performed combining B1PW91 functional with different levels of theory.

| Basis set                   | Solvent <sup>c</sup> | XC <sup>d</sup> | Neutral ( $\text{CHX}_3$ ) |       |       |         |       | Cation ( $\text{CX}_3^+$ ) |                     |                     |                    |       | Anion ( $\text{CX}_3^-$ ) |        |        |        |
|-----------------------------|----------------------|-----------------|----------------------------|-------|-------|---------|-------|----------------------------|---------------------|---------------------|--------------------|-------|---------------------------|--------|--------|--------|
|                             |                      |                 | F                          | Cl    | Br    | I       | RMSD  | F                          | Cl                  | Br                  | I                  | RMSD  | F                         | Cl     | Br     | I      |
| TZ2P                        | isolated             | -               | 118.60                     | 87.93 | 22.59 | -153.64 | 9.56  | 158.42                     | 245.61              | 221.72              | 112.00             | 12.77 | 184.11                    | 198.14 | 222.85 | 269.15 |
|                             |                      | $f_{\text{XC}}$ | 118.46                     | 86.41 | 13.12 | -175.87 | 8.67  | 158.01                     | 242.12              | 200.59              | 62.10              | 17.40 | 183.90                    | 199.47 | 238.72 | 384.85 |
|                             | COSMO                | -               | 119.79                     | 89.09 | 25.28 | -146.18 | 12.68 | 158.14                     | 247.55              | 225.58              | 121.64             | 17.58 | 183.75                    | 190.19 | 207.68 | 233.96 |
|                             |                      | $f_{\text{XC}}$ | 119.65                     | 87.61 | 16.06 | -168.74 | 7.06  | 157.74                     | 244.08              | 204.62              | 71.94              | 12.72 | 183.55                    | 191.21 | 220.86 | 327.75 |
| TZ2P-J                      | isolated             | -               | 124.69                     | 87.56 | 20.28 | -155.28 | 8.25  | 164.06                     | 247.99              | 225.37              | 123.44             | 19.11 | 180.98                    | 201.48 | 230.14 | 277.50 |
|                             |                      | $f_{\text{XC}}$ | 124.56                     | 86.09 | 11.17 | -176.13 | 8.42  | 163.67                     | 244.58              | 204.62              | 74.08              | 13.04 | 180.79                    | 202.84 | 245.83 | 391.51 |
|                             | COSMO                | -               | 126.20                     | 89.00 | 23.24 | -147.58 | 11.72 | 163.77                     | 249.91              | 229.25              | 133.15             | 24.01 | 181.71                    | 193.88 | 214.27 | 240.69 |
|                             |                      | $f_{\text{XC}}$ | 126.07                     | 87.57 | 14.36 | -168.83 | 6.89  | 163.39                     | 246.52              | 208.69              | 83.92              | 9.89  | 181.53                    | 194.93 | 227.31 | 333.18 |
| ATZ2P                       | isolated             | -               | 119.74                     | 87.75 | 22.01 | -       | 9.47  | 159.41                     | 242.70              | 220.54              | -                  | 10.00 | 177.68                    | 193.75 | 221.76 | -      |
|                             |                      | $f_{\text{XC}}$ | 119.60                     | 86.24 | 12.63 | -       | 5.68  | 159.00                     | 239.25              | 199.23              | -                  | 6.78  | 177.53                    | 194.95 | 237.02 | -      |
|                             | COSMO                | -               | 121.11                     | 88.88 | 24.76 | -       | 11.03 | 159.15                     | 244.53              | 224.15              | -                  | 12.02 | 178.21                    | 187.72 | 207.47 | -      |
|                             |                      | $f_{\text{XC}}$ | 120.97                     | 87.42 | 15.66 | -       | 6.87  | 158.75                     | 241.10              | 203.03              | -                  | 5.88  | 178.03                    | 188.69 | 220.41 | -      |
| QZ3P-1D                     | isolated             | -               | 122.21                     | 88.48 | 21.45 | -       | 9.41  | 161.82                     | 248.58              | 225.28              | -                  | 14.24 | 182.80                    | 198.42 | 227.21 | -      |
|                             |                      | $f_{\text{XC}}$ | 122.04                     | 86.95 | 12.10 | -       | 5.79  | 161.38                     | 244.97              | 203.87              | -                  | 8.15  | 182.71                    | 199.63 | 242.16 | -      |
|                             | COSMO                | -               | 123.46                     | 89.50 | 24.18 | -       | 11.00 | 161.53                     | 250.40              | 229.30              | -                  | 16.47 | 182.88                    | 191.36 | 211.89 | -      |
|                             |                      | $f_{\text{XC}}$ | 123.30                     | 88.00 | 15.06 | -       | 6.99  | 161.11                     | 246.81              | 208.05              | -                  | 8.56  | 182.72                    | 192.33 | 224.64 | -      |
| jcpl                        | isolated             | -               | 118.35                     | 87.64 | 23.04 | -153.16 | 9.77  | 158.74                     | 245.00              | 221.66              | 110.41             | 12.17 | 183.22                    | 197.59 | 223.62 | 270.16 |
|                             |                      | $f_{\text{XC}}$ | 118.23                     | 86.28 | 14.42 | -172.93 | 7.72  | 158.39                     | 241.80              | 202.05              | 62.28              | 17.21 | 183.02                    | 199.01 | 239.63 | 384.48 |
|                             | COSMO                | -               | 119.53                     | 88.77 | 25.69 | -145.99 | 12.81 | 158.49                     | 246.90              | 225.40              | 119.78             | 16.78 | 182.74                    | 189.63 | 208.24 | 235.02 |
|                             |                      | $f_{\text{XC}}$ | 119.41                     | 87.45 | 17.29 | -166.15 | 6.84  | 158.15                     | 243.73              | 205.96              | 71.80              | 12.75 | 182.55                    | 190.74 | 221.54 | 327.96 |
| QZ4P                        | isolated             | -               | 122.05                     | 88.16 | 21.73 | -153.85 | 9.12  | 161.59                     | 247.86              | 227.36              | 126.79             | 20.48 | 181.62                    | 199.58 | 228.30 | 273.57 |
|                             |                      | $f_{\text{XC}}$ | 121.92                     | 86.74 | 13.07 | -172.84 | 7.38  | 161.24                     | 244.58              | 207.67              | 80.97              | 9.71  | 181.48                    | 200.83 | 243.40 | 380.30 |
|                             | COSMO                | -               | 123.46                     | 89.32 | 24.72 | -146.21 | 12.51 | 161.34                     | 249.88              | 231.41              | 136.32             | 25.50 | 181.76                    | 192.88 | 213.56 | 239.61 |
|                             |                      | $f_{\text{XC}}$ | 123.34                     | 87.93 | 16.26 | -165.61 | 6.56  | 160.99                     | 246.62              | 211.86              | 90.50              | 8.00  | 181.61                    | 193.93 | 226.36 | 328.33 |
| QZ4P-J                      | isolated             | -               | 122.86                     | 88.85 | 21.53 | -153.53 | 9.35  | 162.24                     | 248.49              | 227.30              | 125.37             | 20.10 | 184.32                    | 199.79 | 228.52 | 273.39 |
|                             |                      | $f_{\text{XC}}$ | 122.71                     | 87.31 | 12.42 | -173.68 | 7.81  | 161.86                     | 245.04              | 206.61              | 77.05              | 11.44 | 184.14                    | 201.05 | 243.83 | 381.26 |
|                             | COSMO                | -               | 124.26                     | 90.00 | 24.49 | -146.05 | 12.69 | 161.96                     | 250.46              | 231.28              | 134.69             | 24.96 | 183.78                    | 193.23 | 213.71 | 239.83 |
|                             |                      | $f_{\text{XC}}$ | 124.12                     | 88.49 | 15.61 | -166.58 | 6.82  | 161.60                     | 247.03              | 210.75              | 86.39              | 8.97  | 183.61                    | 194.28 | 226.73 | 329.91 |
| Experimental <sup>e,f</sup> |                      |                 | 122.20 <sup>g</sup>        | 77.22 | 9.67  | -162.08 | -     | 150.70 <sup>h</sup>        | 236.30 <sup>h</sup> | 207.00 <sup>h</sup> | 95.00 <sup>h</sup> | -     | 175.00 <sup>g</sup>       | -      | -      | -      |

<sup>a</sup> in ppm. <sup>b</sup> Estimated by the deviation between theoretical and experimental values. <sup>c</sup> COSMO was applied with parameters for chloroform. <sup>d</sup> Terms from the DFT exchange-correlation response kernel ( $f_{\text{XC}}$ ) were included to improve the spin-orbit (SO) contribution. <sup>e</sup> Experimental  $\delta^{13}\text{C}$  for  $\text{CH}_4$  is equal to -8.65 ppm. <sup>f</sup> Error = 0.01 ppm. <sup>g</sup> Reference 2. <sup>h</sup> Reference 3.

**Table S9:** Carbon chemical shifts<sup>a</sup> ( $\delta^{13}\text{C}$ ) and the root mean square deviation (RMSD)<sup>b</sup> calculated for  $\text{CHX}_3$ ,  $\text{CX}_3^+$ , and  $\text{CX}_3^-$  ( $\text{X} = \text{F}, \text{Cl}, \text{Br}, \text{or I}$ ) molecules. Calculations were performed combining B3LYP functional with different levels of theory.

| Basis set                   | Solvent <sup>c</sup> | XC <sup>d</sup> | Neutral ( $\text{CHX}_3$ ) |       |       |         |       | Cation ( $\text{CX}_3^+$ ) |                     |                     |                    |       | Anion ( $\text{CX}_3^-$ ) |        |        |        |
|-----------------------------|----------------------|-----------------|----------------------------|-------|-------|---------|-------|----------------------------|---------------------|---------------------|--------------------|-------|---------------------------|--------|--------|--------|
|                             |                      |                 | F                          | Cl    | Br    | I       | RMSD  | F                          | Cl                  | Br                  | I                  | RMSD  | F                         | Cl     | Br     | I      |
| TZ2P                        | isolated             | -               | 121.89                     | 92.36 | 23.93 | -158.79 | 10.53 | 160.63                     | 250.05              | 225.05              | 113.11             | 15.34 | 189.75                    | 209.98 | 236.69 | 281.20 |
|                             |                      | $f_{\text{XC}}$ | 121.71                     | 90.24 | 10.47 | -188.55 | 14.76 | 160.09                     | 245.17              | 174.48              | 41.29              | 32.05 | 189.48                    | 212.00 | 261.92 | 483.84 |
|                             | COSMO                | -               | 122.97                     | 93.44 | 26.79 | -150.73 | 13.09 | 160.24                     | 251.95              | 228.98              | 122.97             | 20.01 | 189.60                    | 201.30 | 220.43 | 244.67 |
|                             |                      | $f_{\text{XC}}$ | 122.80                     | 91.39 | 13.66 | -181.38 | 12.14 | 159.72                     | 247.10              | 198.88              | 50.97              | 23.47 | 189.34                    | 202.84 | 241.07 | 402.34 |
| TZ2P-J                      | isolated             | -               | 127.42                     | 91.74 | 21.67 | -160.64 | 9.80  | 165.87                     | 251.85              | 228.08              | 123.16             | 20.67 | 185.51                    | 212.49 | 244.27 | 290.60 |
|                             |                      | $f_{\text{XC}}$ | 127.25                     | 89.73 | 8.98  | -187.79 | 14.52 | 165.38                     | 247.17              | 198.93              | 53.79              | 22.90 | 185.27                    | 214.67 | 270.02 | 494.52 |
|                             | COSMO                | -               | 128.79                     | 93.10 | 24.79 | -152.32 | 12.44 | 165.42                     | 253.69              | 231.98              | 133.07             | 25.46 | 186.38                    | 204.17 | 227.26 | 252.28 |
|                             |                      | $f_{\text{XC}}$ | 128.64                     | 91.14 | 12.42 | -180.46 | 12.05 | 164.95                     | 249.04              | 203.06              | 63.42              | 18.56 | 186.15                    | 205.86 | 248.42 | 411.26 |
| ATZ2P                       | isolated             | -               | 122.73                     | 91.80 | 22.93 | -       | 11.38 | 161.27                     | 246.99              | 223.84              | -                  | 13.03 | 182.40                    | 204.09 | 234.82 | -      |
|                             |                      | $f_{\text{XC}}$ | 122.55                     | 89.68 | 9.62  | -       | 7.20  | 160.74                     | 242.13              | 193.17              | -                  | 10.43 | 182.26                    | 205.91 | 259.07 | -      |
|                             | COSMO                | -               | 123.97                     | 92.86 | 25.85 | -       | 13.03 | 160.85                     | 248.72              | 227.42              | -                  | 14.99 | 183.19                    | 197.75 | 219.75 | -      |
|                             |                      | $f_{\text{XC}}$ | 123.79                     | 90.79 | 12.89 | -       | 8.10  | 160.32                     | 243.88              | 196.97              | -                  | 9.14  | 182.96                    | 199.22 | 240.09 | -      |
| QZ3P-1D                     | isolated             | -               | 125.31                     | 92.68 | 22.82 | -       | 11.85 | 163.84                     | 252.70              | 228.01              | -                  | 17.16 | 187.64                    | 208.84 | 240.36 | -      |
|                             |                      | $f_{\text{XC}}$ | 125.09                     | 90.51 | 9.41  | -       | 7.85  | 163.26                     | 247.60              | 197.09              | -                  | 11.31 | 187.67                    | 210.70 | 264.00 | -      |
|                             | COSMO                | -               | 126.43                     | 93.63 | 25.72 | -       | 13.48 | 163.44                     | 254.42              | 232.00              | -                  | 19.28 | 187.83                    | 201.35 | 224.15 | -      |
|                             |                      | $f_{\text{XC}}$ | 126.21                     | 91.51 | 12.60 | -       | 8.73  | 162.87                     | 249.34              | 201.26              | -                  | 10.82 | 187.66                    | 202.82 | 244.12 | -      |
| jcpl                        | isolated             | -               | 122.32                     | 92.51 | 24.51 | -158.71 | 10.79 | 161.52                     | 250.09              | 225.36              | 111.56             | 15.15 | 189.57                    | 210.17 | 238.41 | 283.39 |
|                             |                      | $f_{\text{XC}}$ | 122.16                     | 90.63 | 12.40 | -184.58 | 13.17 | 161.06                     | 245.67              | 197.52              | 43.33              | 27.18 | 189.33                    | 212.39 | 264.53 | 487.17 |
|                             | COSMO                | -               | 123.40                     | 93.59 | 27.35 | -150.92 | 13.29 | 161.17                     | 251.95              | 229.17              | 121.17             | 19.56 | 189.31                    | 201.47 | 221.87 | 246.72 |
|                             |                      | $f_{\text{XC}}$ | 123.25                     | 91.76 | 15.52 | -177.78 | 11.10 | 160.73                     | 247.55              | 201.52              | 52.70              | 22.62 | 189.07                    | 203.19 | 243.29 | 405.79 |
| QZ4P                        | isolated             | -               | 125.24                     | 92.40 | 22.92 | -159.47 | 10.27 | 163.89                     | 251.85              | 230.10              | 126.61             | 22.07 | 186.89                    | 210.27 | 241.70 | 286.95 |
|                             |                      | $f_{\text{XC}}$ | 125.08                     | 90.46 | 10.89 | -183.65 | 12.75 | 163.43                     | 247.34              | 202.39              | 62.95              | 18.25 | 186.76                    | 212.31 | 266.76 | 479.49 |
|                             | COSMO                | -               | 126.50                     | 93.47 | 26.05 | -151.20 | 12.93 | 163.46                     | 253.78              | 234.15              | 136.38             | 27.01 | 186.96                    | 203.06 | 226.03 | 251.25 |
|                             |                      | $f_{\text{XC}}$ | 126.34                     | 91.57 | 14.28 | -176.43 | 10.61 | 163.02                     | 249.28              | 206.59              | 72.28              | 14.46 | 186.78                    | 204.79 | 247.03 | 404.69 |
| QZ4P-J                      | isolated             | -               | 125.93                     | 92.94 | 22.49 | -159.48 | 10.39 | 164.10                     | 252.35              | 229.86              | 124.96             | 21.55 | 189.51                    | 210.30 | 241.74 | 286.35 |
|                             |                      | $f_{\text{XC}}$ | 125.74                     | 90.82 | 9.77  | -185.30 | 13.57 | 163.62                     | 247.59              | 200.67              | 57.82              | 20.72 | 189.34                    | 212.33 | 267.03 | 480.65 |
|                             | COSMO                | -               | 127.17                     | 94.00 | 25.60 | -151.41 | 12.98 | 163.67                     | 254.18              | 233.82              | 134.49             | 26.30 | 188.92                    | 203.26 | 225.98 | 251.08 |
|                             |                      | $f_{\text{XC}}$ | 127.00                     | 91.92 | 13.17 | -178.25 | 11.32 | 163.20                     | 249.44              | 204.80              | 66.92              | 16.75 | 188.72                    | 204.97 | 247.23 | 406.60 |
| Experimental <sup>e,f</sup> |                      |                 | 122.20 <sup>g</sup>        | 77.22 | 9.67  | -162.08 | -     | 150.70 <sup>h</sup>        | 236.30 <sup>h</sup> | 207.00 <sup>h</sup> | 95.00 <sup>h</sup> | -     | 175.00 <sup>g</sup>       | -      | -      | -      |

<sup>a</sup> in ppm. <sup>b</sup> Estimated by the deviation between theoretical and experimental values. <sup>c</sup> COSMO was applied with parameters for chloroform. <sup>d</sup> Terms from the DFT exchange-correlation response kernel ( $f_{\text{XC}}$ ) were included to improve the spin-orbit (SO) contribution. <sup>e</sup> Experimental  $\delta^{13}\text{C}$  for  $\text{CH}_4$  is equal to -8.65 ppm. <sup>f</sup> Error = 0.01 ppm. <sup>g</sup> Reference 2. <sup>h</sup> Reference 3.

**Table S10:** Carbon chemical shifts<sup>a</sup> ( $\delta^{13}\text{C}$ ) and the root mean square deviation (RMSD)<sup>b</sup> calculated for  $\text{CHX}_3$ ,  $\text{CX}_3^+$ , and  $\text{CX}_3^-$  (X = F, Cl, Br, or I) molecules. Calculations were performed combining OPBE0 functional with different levels of theory.

| Basis set                   | Solvent <sup>c</sup> | XC <sup>d</sup> | Neutral ( $\text{CHX}_3$ ) |       |       |         |       | Cation ( $\text{CX}_3^+$ ) |                     |                     |                    |       | Anion ( $\text{CX}_3^-$ ) |        |        |        |
|-----------------------------|----------------------|-----------------|----------------------------|-------|-------|---------|-------|----------------------------|---------------------|---------------------|--------------------|-------|---------------------------|--------|--------|--------|
|                             |                      |                 | F                          | Cl    | Br    | I       | RMSD  | F                          | Cl                  | Br                  | I                  | RMSD  | F                         | Cl     | Br     | I      |
| TZ2P                        | isolated             | -               | 115.31                     | 85.86 | 25.36 | -138.16 | 15.33 | 153.66                     | 233.25              | 210.27              | 104.86             | 5.61  | 175.43                    | 186.44 | 206.53 | 243.08 |
|                             |                      | $f_{\text{XC}}$ | 115.18                     | 84.52 | 16.99 | -158.20 | 6.54  | 153.28                     | 230.04              | 190.80              | 58.16              | 20.41 | 175.23                    | 187.59 | 219.31 | 330.46 |
|                             | COSMO                | -               | 116.53                     | 87.00 | 27.78 | -131.54 | 18.63 | 153.55                     | 235.15              | 213.97              | 114.12             | 10.29 | 175.25                    | 179.71 | 193.75 | 213.78 |
|                             |                      | $f_{\text{XC}}$ | 116.40                     | 85.69 | 19.64 | -151.82 | 8.80  | 153.17                     | 231.96              | 194.65              | 67.65              | 15.21 | 175.06                    | 180.62 | 204.62 | 287.16 |
| TZ2P-J                      | isolated             | -               | 121.29                     | 85.14 | 22.91 | -138.45 | 14.12 | 158.87                     | 235.80              | 214.18              | 118.18             | 12.80 | 172.52                    | 189.50 | 212.98 | 249.88 |
|                             |                      | $f_{\text{XC}}$ | 121.17                     | 83.85 | 14.89 | -157.29 | 4.88  | 158.51                     | 232.69              | 195.19              | 72.19              | 13.54 | 172.34                    | 190.64 | 225.36 | 334.25 |
|                             | COSMO                | -               | 122.86                     | 86.58 | 25.61 | -131.63 | 17.81 | 158.76                     | 237.72              | 217.97              | 127.58             | 17.67 | 173.40                    | 183.12 | 199.63 | 219.20 |
|                             |                      | $f_{\text{XC}}$ | 122.74                     | 85.32 | 17.80 | -150.75 | 8.07  | 158.40                     | 234.62              | 199.14              | 81.77              | 8.64  | 173.23                    | 184.03 | 210.17 | 290.15 |
| ATZ2P                       | isolated             | -               | 116.42                     | 85.63 | 25.10 | -       | 10.68 | 154.44                     | 230.16              | 208.80              | -                  | 4.28  | 169.27                    | 181.90 | 205.33 | -      |
|                             |                      | $f_{\text{XC}}$ | 116.29                     | 84.31 | 16.77 | -       | 6.72  | 154.06                     | 227.00              | 193.05              | -                  | 9.87  | 169.14                    | 182.89 | 217.31 | -      |
|                             | COSMO                | -               | 117.84                     | 86.79 | 27.67 | -       | 12.04 | 154.35                     | 231.99              | 212.27              | -                  | 4.46  | 169.94                    | 176.83 | 193.22 | -      |
|                             |                      | $f_{\text{XC}}$ | 117.71                     | 85.51 | 19.58 | -       | 7.90  | 153.97                     | 228.84              | 192.85              | -                  | 9.43  | 169.77                    | 177.66 | 203.62 | -      |
| QZ3P-1D                     | isolated             | -               | 119.21                     | 86.51 | 24.64 | -       | 10.32 | 157.20                     | 236.77              | 214.79              | -                  | 5.86  | 175.27                    | 187.31 | 211.45 | -      |
|                             |                      | $f_{\text{XC}}$ | 119.07                     | 85.17 | 16.50 | -       | 6.32  | 156.81                     | 233.49              | 195.35              | -                  | 7.77  | 175.25                    | 188.34 | 223.36 | -      |
|                             | COSMO                | -               | 120.46                     | 87.53 | 27.15 | -       | 11.76 | 157.02                     | 238.57              | 218.65              | -                  | 7.76  | 175.41                    | 181.25 | 198.38 | -      |
|                             |                      | $f_{\text{XC}}$ | 120.30                     | 86.22 | 19.19 | -       | 7.64  | 156.63                     | 235.30              | 199.33              | -                  | 5.63  | 175.28                    | 182.09 | 208.74 | -      |
| jcpl                        | isolated             | -               | 114.68                     | 85.17 | 25.74 | -136.84 | 15.93 | 153.56                     | 231.99              | 209.78              | 103.70             | 5.25  | 173.85                    | 185.06 | 206.19 | 242.11 |
|                             |                      | $f_{\text{XC}}$ | 114.57                     | 83.97 | 18.16 | -154.63 | 7.61  | 153.23                     | 229.09              | 191.89              | 58.99              | 19.90 | 173.67                    | 186.25 | 218.85 | 326.72 |
|                             | COSMO                | -               | 115.91                     | 86.31 | 28.13 | -130.52 | 19.10 | 153.47                     | 233.86              | 213.37              | 112.68             | 9.58  | 173.61                    | 178.37 | 193.34 | 213.10 |
|                             |                      | $f_{\text{XC}}$ | 115.79                     | 85.15 | 20.76 | -148.60 | 10.11 | 153.15                     | 230.97              | 195.63              | 68.16              | 14.87 | 173.43                    | 179.33 | 204.13 | 284.45 |
| QZ4P                        | isolated             | -               | 118.17                     | 85.67 | 25.21 | -135.33 | 16.16 | 155.81                     | 235.54              | 216.43              | 122.37             | 14.70 | 172.78                    | 187.55 | 210.84 | 245.56 |
|                             |                      | $f_{\text{XC}}$ | 118.05                     | 84.43 | 17.63 | -152.36 | 7.53  | 155.48                     | 232.58              | 198.57              | 79.97              | 9.13  | 172.66                    | 188.56 | 222.56 | 322.97 |
|                             | COSMO                | -               | 119.63                     | 86.86 | 27.99 | -128.43 | 19.80 | 155.71                     | 237.59              | 220.36              | 131.44             | 19.58 | 173.04                    | 181.75 | 198.59 | 217.59 |
|                             |                      | $f_{\text{XC}}$ | 119.51                     | 85.65 | 20.59 | -145.75 | 10.77 | 155.39                     | 234.64              | 202.61              | 89.06              | 4.45  | 172.90                    | 182.63 | 208.75 | 284.12 |
| QZ4P-J                      | isolated             | -               | 119.59                     | 86.64 | 25.02 | -135.39 | 16.15 | 157.55                     | 236.89              | 217.11              | 121.30             | 14.50 | 176.42                    | 188.11 | 211.82 | 246.09 |
|                             |                      | $f_{\text{XC}}$ | 119.46                     | 85.29 | 17.02 | -153.54 | 7.06  | 157.19                     | 233.74              | 198.25              | 76.43              | 10.84 | 176.26                    | 189.13 | 223.79 | 324.82 |
|                             | COSMO                | -               | 121.04                     | 87.82 | 27.79 | -128.58 | 19.78 | 157.41                     | 238.88              | 220.96              | 130.23             | 19.29 | 176.01                    | 182.41 | 199.41 | 218.38 |
|                             |                      | $f_{\text{XC}}$ | 120.91                     | 86.49 | 19.99 | -147.00 | 10.27 | 157.06                     | 235.75              | 202.23              | 85.39              | 6.24  | 175.85                    | 183.28 | 209.81 | 286.31 |
| Experimental <sup>e,f</sup> |                      |                 | 122.20 <sup>g</sup>        | 77.22 | 9.67  | -162.08 | -     | 150.70 <sup>h</sup>        | 236.30 <sup>h</sup> | 207.00 <sup>h</sup> | 95.00 <sup>h</sup> | -     | 175.00 <sup>g</sup>       | -      | -      | -      |

<sup>a</sup> in ppm. <sup>b</sup> Estimated by the deviation between theoretical and experimental values. <sup>c</sup> COSMO was applied with parameters for chloroform. <sup>d</sup> Terms from the DFT exchange-correlation response kernel ( $f_{\text{XC}}$ ) were included to improve the spin-orbit (SO) contribution. <sup>e</sup> Experimental  $\delta^{13}\text{C}$  for  $\text{CH}_4$  is equal to -8.65 ppm. <sup>f</sup> Error = 0.01 ppm. <sup>g</sup> Reference 2. <sup>h</sup> Reference 3.

**Table S11:** Carbon chemical shifts<sup>a</sup> ( $\delta^{13}\text{C}$ ) and the root mean square deviation (RMSD)<sup>b</sup> calculated for  $\text{CHX}_3$ ,  $\text{CX}_3^+$ , and  $\text{CX}_3^-$  (X = F, Cl, Br, or I) molecules. Calculations were performed combining PBE0 functional with different levels of theory.

| Basis set                   | Solvent <sup>c</sup> | XC <sup>d</sup> | Neutral ( $\text{CHX}_3$ ) |       |       |         |       | Cation ( $\text{CX}_3^+$ ) |                     |                     |                    |       | Anion ( $\text{CX}_3^-$ ) |        |        |        |
|-----------------------------|----------------------|-----------------|----------------------------|-------|-------|---------|-------|----------------------------|---------------------|---------------------|--------------------|-------|---------------------------|--------|--------|--------|
|                             |                      |                 | F                          | Cl    | Br    | I       | RMSD  | F                          | Cl                  | Br                  | I                  | RMSD  | F                         | Cl     | Br     | I      |
| TZ2P                        | isolated             | -               | 119.77                     | 88.61 | 23.15 | -153.61 | 9.86  | 159.50                     | 245.70              | 221.83              | 111.25             | 12.75 | 185.10                    | 199.03 | 223.05 | 269.46 |
|                             |                      | $f_{\text{XC}}$ | 119.63                     | 87.11 | 13.77 | -175.61 | 8.72  | 159.09                     | 242.24              | 200.87              | 61.66              | 17.71 | 184.88                    | 200.37 | 239.03 | 386.44 |
|                             | COSMO                | -               | 120.97                     | 89.75 | 25.79 | -146.21 | 12.94 | 159.26                     | 247.65              | 225.69              | 120.89             | 17.48 | 184.86                    | 190.91 | 207.57 | 233.46 |
|                             |                      | $f_{\text{XC}}$ | 120.83                     | 88.28 | 16.65 | -168.54 | 7.33  | 158.86                     | 244.20              | 204.90              | 71.49              | 13.10 | 184.65                    | 191.94 | 220.78 | 327.80 |
| TZ2P-J                      | isolated             | -               | 125.67                     | 88.24 | 20.92 | -155.06 | 8.79  | 164.97                     | 248.11              | 225.36              | 122.54             | 18.96 | 181.60                    | 201.93 | 230.03 | 277.46 |
|                             |                      | $f_{\text{XC}}$ | 125.54                     | 86.79 | 11.92 | -175.67 | 8.55  | 164.58                     | 244.73              | 204.80              | 73.54              | 13.50 | 181.40                    | 203.30 | 245.77 | 392.40 |
|                             | COSMO                | -               | 127.18                     | 89.66 | 23.84 | -147.43 | 12.20 | 164.72                     | 250.04              | 229.25              | 132.25             | 23.81 | 182.43                    | 194.18 | 213.85 | 239.82 |
|                             |                      | $f_{\text{XC}}$ | 127.07                     | 88.25 | 15.07 | -168.44 | 7.33  | 164.36                     | 246.69              | 208.89              | 83.39              | 10.40 | 182.26                    | 195.25 | 226.90 | 332.59 |
| ATZ2P                       | isolated             | -               | 120.80                     | 88.41 | 22.61 | -       | 9.91  | 160.36                     | 242.74              | 220.58              | -                  | 10.32 | 178.36                    | 194.03 | 221.57 | -      |
|                             |                      | $f_{\text{XC}}$ | 120.66                     | 86.92 | 13.31 | -       | 6.05  | 159.96                     | 239.32              | 199.44              | -                  | 7.12  | 178.21                    | 195.23 | 236.73 | -      |
|                             | COSMO                | -               | 122.17                     | 89.52 | 25.33 | -       | 11.50 | 160.12                     | 244.57              | 224.18              | -                  | 12.28 | 179.03                    | 188.00 | 207.10 | -      |
|                             |                      | $f_{\text{XC}}$ | 122.04                     | 88.07 | 16.30 | -       | 7.34  | 159.73                     | 241.16              | 203.23              | -                  | 6.31  | 178.85                    | 188.97 | 219.98 | -      |
| QZ3P-1D                     | isolated             | -               | 123.36                     | 89.31 | 22.28 | -       | 10.11 | 162.86                     | 248.87              | 225.50              | -                  | 14.70 | 183.66                    | 198.87 | 227.13 | -      |
|                             |                      | $f_{\text{XC}}$ | 123.20                     | 87.81 | 13.08 | -       | 6.45  | 162.43                     | 245.30              | 204.32              | -                  | 8.68  | 183.60                    | 200.07 | 241.90 | -      |
|                             | COSMO                | -               | 124.60                     | 90.29 | 24.95 | -       | 11.69 | 162.59                     | 250.67              | 229.48              | -                  | 16.86 | 183.81                    | 191.75 | 211.60 | -      |
|                             |                      | $f_{\text{XC}}$ | 124.43                     | 88.81 | 15.95 | -       | 7.72  | 162.17                     | 247.11              | 208.44              | -                  | 9.14  | 183.65                    | 192.70 | 224.22 | -      |
| jcpl                        | isolated             | -               | 119.70                     | 88.44 | 23.71 | -152.95 | 10.16 | 159.94                     | 245.15              | 221.81              | 109.73             | 12.25 | 184.28                    | 198.52 | 223.85 | 270.35 |
|                             |                      | $f_{\text{XC}}$ | 119.58                     | 87.09 | 15.19 | -172.48 | 7.79  | 159.60                     | 241.99              | 202.39              | 61.99              | 17.48 | 184.08                    | 199.94 | 239.92 | 385.59 |
|                             | COSMO                | -               | 120.90                     | 89.57 | 26.33 | -145.85 | 13.18 | 159.75                     | 247.06              | 225.56              | 119.10             | 16.76 | 183.94                    | 190.41 | 208.17 | 234.41 |
|                             |                      | $f_{\text{XC}}$ | 120.78                     | 88.26 | 19.03 | -165.77 | 7.50  | 159.41                     | 243.92              | 206.31              | 71.50              | 13.10 | 183.75                    | 191.52 | 221.48 | 327.61 |
| QZ4P                        | isolated             | -               | 123.09                     | 88.89 | 22.47 | -153.39 | 9.70  | 162.53                     | 248.05              | 227.49              | 126.20             | 20.44 | 182.44                    | 199.88 | 227.95 | 273.27 |
|                             |                      | $f_{\text{XC}}$ | 122.96                     | 87.49 | 13.92 | -172.12 | 7.50  | 162.17                     | 244.81              | 208.00              | 80.82              | 10.08 | 182.31                    | 201.12 | 242.99 | 380.20 |
|                             | COSMO                | -               | 124.50                     | 90.03 | 25.38 | -145.83 | 13.04 | 162.30                     | 250.08              | 231.54              | 135.69             | 25.41 | 182.61                    | 193.10 | 213.03 | 238.66 |
|                             |                      | $f_{\text{XC}}$ | 124.37                     | 88.65 | 17.02 | -164.99 | 7.03  | 161.95                     | 246.84              | 212.18              | 90.30              | 8.46  | 182.45                    | 194.14 | 225.73 | 327.21 |
| QZ4P-J                      | isolated             | -               | 123.95                     | 89.54 | 22.14 | -153.28 | 9.85  | 163.23                     | 248.70              | 227.37              | 124.54             | 19.99 | 185.23                    | 200.05 | 228.18 | 273.09 |
|                             |                      | $f_{\text{XC}}$ | 123.81                     | 88.01 | 13.14 | -173.17 | 7.97  | 162.85                     | 245.28              | 206.87              | 76.66              | 11.88 | 185.07                    | 201.29 | 243.43 | 381.23 |
|                             | COSMO                | -               | 125.36                     | 90.67 | 25.05 | -145.87 | 13.14 | 162.98                     | 250.67              | 231.34              | 133.83             | 24.79 | 184.72                    | 193.41 | 213.17 | 238.90 |
|                             |                      | $f_{\text{XC}}$ | 125.21                     | 89.17 | 16.26 | -166.16 | 7.28  | 162.61                     | 247.26              | 210.99              | 85.96              | 9.48  | 184.54                    | 194.45 | 226.11 | 328.87 |
| Experimental <sup>e,f</sup> |                      |                 | 122.20 <sup>g</sup>        | 77.22 | 9.67  | -162.08 | -     | 150.70 <sup>h</sup>        | 236.30 <sup>h</sup> | 207.00 <sup>h</sup> | 95.00 <sup>h</sup> | -     | 175.00 <sup>g</sup>       | -      | -      | -      |

<sup>a</sup> in ppm. <sup>b</sup> Estimated by the deviation between theoretical and experimental values. <sup>c</sup> COSMO was applied with parameters for chloroform. <sup>d</sup> Terms from the DFT exchange-correlation response kernel ( $f_{\text{XC}}$ ) were included to improve the spin-orbit (SO) contribution. <sup>e</sup> Experimental  $\delta^{13}\text{C}$  for  $\text{CH}_4$  is equal to -8.65 ppm. <sup>f</sup> Error = 0.01 ppm. <sup>g</sup> Reference 2. <sup>h</sup> Reference 3.



## 4 Individual contributions of the $\sigma^{13}\text{C}$ NMR

In this work, the  $\sigma^{\text{para}}$  refers to the paramagnetic shielding obtained from SR-ZORA calculation, whereas the  $\sigma^{\text{SO}}$  is given by the difference between SO-ZORA and SR-ZORA calculations. The  $\sigma^{\text{dia}}$  contribution is obtained from SO-ZORA calculation. Table S12 shows the isotropic value for each contribution, while it is decomposed into principal components ( $\sigma_{xx}$ ,  $\sigma_{yy}$ , and  $\sigma_{zz}$ ) in Table S13.

**Table S12:** Carbon shielding tensors ( $\sigma$ )<sup>a-c</sup>, and their diamagnetic ( $\sigma^{\text{dia}}$ ), paramagnetic ( $\sigma^{\text{para}}$ ), and spin-orbit ( $\sigma^{\text{SO}}$ ) contributions<sup>b,c</sup> obtained for  $\text{CHX}_3$ ,  $\text{CX}_3^+$ , and  $\text{CX}_3^-$  (X = F, Cl, Br, or I) compounds.

| Compound                           | $\sigma^{\text{dia}}$ | $\sigma^{\text{para}}$ | $\sigma^{\text{SO}}$ | $\sigma$ |
|------------------------------------|-----------------------|------------------------|----------------------|----------|
| <b>CHF<sub>3</sub></b>             | 267.88                | -210.36                | 2.54                 | 60.06    |
| <b>CHCl<sub>3</sub></b>            | 257.75                | -179.65                | 15.49                | 93.59    |
| <b>CHBr<sub>3</sub></b>            | 256.62                | -173.95                | 83.91                | 166.58   |
| <b>CHI<sub>3</sub></b>             | 236.44                | -116.94                | 228.87               | 348.37   |
| <b>CF<sub>3</sub><sup>+</sup></b>  | 265.10                | -244.73                | 2.76                 | 23.13    |
| <b>CCl<sub>3</sub><sup>+</sup></b> | 275.61                | -361.00                | 20.19                | -65.21   |
| <b>CBr<sub>3</sub><sup>+</sup></b> | 270.97                | -417.93                | 117.66               | -29.30   |
| <b>CI<sub>3</sub><sup>+</sup></b>  | 266.17                | -497.59                | 324.79               | 93.37    |
| <b>CF<sub>3</sub><sup>-</sup></b>  | 262.61                | -265.26                | 2.69                 | 0.03     |
| <b>CCl<sub>3</sub><sup>-</sup></b> | 254.72                | -269.71                | 4.46                 | -10.52   |
| <b>CBr<sub>3</sub><sup>-</sup></b> | 248.20                | -286.76                | -4.41                | -42.96   |
| <b>CI<sub>3</sub><sup>-</sup></b>  | 248.93                | -265.34                | -127.30              | -143.71  |

<sup>a</sup>  $\sigma = \sigma^{\text{dia}} + \sigma^{\text{para}} + \sigma^{\text{SO}}$ . <sup>b</sup> All values are in ppm. <sup>c</sup> Results were obtained using B1PW91/QZ4P level of theory, the COSMO solvent model, the spin-orbit (SO) ZORA approach to consider the relativistic effects, and terms from the DFT exchange-correlation response kernel ( $f_{\text{XC}}$ ) were included to improve the SO contribution.

**Table S13:** Carbon shielding tensors ( $\sigma$ )<sup>a-c</sup>, and their diamagnetic ( $\sigma^{\text{dia}}$ ), paramagnetic ( $\sigma^{\text{para}}$ ), and spin-orbit ( $\sigma^{\text{SO}}$ ) contributions<sup>b,c</sup> in terms of principal components ( $\sigma_{xx}$ ,  $\sigma_{yy}$ , and  $\sigma_{zz}$ ) obtained for  $\text{CHX}_3$ ,  $\text{CX}_3^+$ , and  $\text{CX}_3^-$  (X = F, Cl, Br, or I) compounds.

| Compound                           | $\sigma^{\text{dia}}$ |               |               | $\sigma^{\text{para}}$ |               |               | $\sigma^{\text{SO}}$ |               |               | $\sigma$      |               |               |
|------------------------------------|-----------------------|---------------|---------------|------------------------|---------------|---------------|----------------------|---------------|---------------|---------------|---------------|---------------|
|                                    | $\sigma_{xx}$         | $\sigma_{yy}$ | $\sigma_{zz}$ | $\sigma_{xx}$          | $\sigma_{yy}$ | $\sigma_{zz}$ | $\sigma_{xx}$        | $\sigma_{yy}$ | $\sigma_{zz}$ | $\sigma_{xx}$ | $\sigma_{yy}$ | $\sigma_{zz}$ |
| <b>CHF<sub>3</sub></b>             | 275.90                | 275.90        | 251.85        | -211.44                | -211.43       | -208.21       | 2.19                 | 2.19          | 3.25          | 66.65         | 66.65         | 46.89         |
| <b>CHCl<sub>3</sub></b>            | 256.86                | 256.78        | 259.61        | -158.60                | -158.41       | -221.94       | 10.77                | 10.76         | 24.94         | 109.03        | 109.13        | 62.61         |
| <b>CHBr<sub>3</sub></b>            | 258.59                | 258.62        | 252.66        | -151.45                | -151.45       | -218.96       | 51.09                | 51.09         | 149.55        | 158.22        | 158.25        | 183.26        |
| <b>CHI<sub>3</sub></b>             | 235.90                | 235.92        | 237.51        | -92.40                 | -92.38        | -166.05       | 96.72                | 96.76         | 493.12        | 240.23        | 240.31        | 564.57        |
| <b>CF<sub>3</sub><sup>+</sup></b>  | 269.56                | 269.55        | 256.20        | -259.69                | -259.59       | -214.93       | 2.17                 | 2.17          | 3.93          | 12.04         | 12.12         | 45.21         |
| <b>CCl<sub>3</sub><sup>+</sup></b> | 280.49                | 280.49        | 265.84        | -436.66                | -436.51       | -209.84       | 14.65                | 14.66         | 31.25         | -141.51       | -141.37       | 87.26         |
| <b>CBr<sub>3</sub><sup>+</sup></b> | 278.86                | 278.87        | 255.18        | -526.49                | -526.24       | -201.05       | 81.81                | 81.85         | 189.31        | -165.82       | -165.52       | 243.43        |
| <b>Cl<sub>3</sub><sup>+</sup></b>  | 277.18                | 277.14        | 244.20        | -670.71                | -670.15       | -151.92       | 194.80               | 195.06        | 584.50        | -198.73       | -197.95       | 676.79        |
| <b>CF<sub>3</sub><sup>-</sup></b>  | 266.27                | 266.28        | 255.28        | -300.83                | -300.83       | -194.13       | 2.26                 | 2.26          | 3.54          | -32.30        | -32.29        | 64.69         |
| <b>CCl<sub>3</sub><sup>-</sup></b> | 255.65                | 255.66        | 252.86        | -291.83                | -291.80       | -225.48       | 3.95                 | 3.95          | 5.49          | -32.23        | -32.19        | 32.86         |
| <b>CBr<sub>3</sub><sup>-</sup></b> | 250.33                | 250.35        | 243.93        | -311.70                | -311.66       | -236.91       | 0.73                 | 0.73          | -14.68        | -60.65        | -60.58        | -7.66         |
| <b>Cl<sub>3</sub><sup>-</sup></b>  | 253.61                | 253.64        | 239.54        | -292.76                | -292.65       | -210.60       | -71.00               | -71.03        | -239.88       | -110.15       | -110.04       | -210.93       |

<sup>a</sup>  $\sigma = \sigma^{\text{dia}} + \sigma^{\text{para}} + \sigma^{\text{SO}}$ . <sup>b</sup> All values are in ppm. <sup>c</sup> Results were obtained using B1PW91/QZ4P level of theory, the COSMO solvent model, the spin-orbit (SO) ZORA approach to consider the relativistic effects, and terms from the DFT exchange-correlation response kernel ( $f_{\text{XC}}$ ) were included to improve the SO contribution.

## 5 NLMO's contributions to the $\sigma^{13}\text{C}$ NMR

NLMO's contributions to diamagnetic, paramagnetic, and spin-orbit terms of the  $\sigma^{13}\text{C}$  NMR are displayed in Tables S14-S17 for all studied compounds. NLMOs were designated according to atom numbering present in the Figure S1.

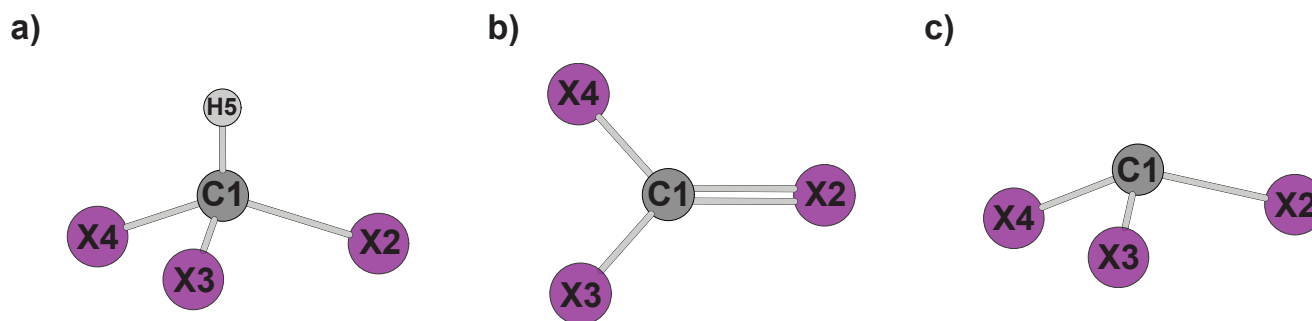

**Figure S1:** Structures and atom numbering of a) neutral (CHX<sub>3</sub>), b) cation (CX<sub>3</sub><sup>+</sup>), and c) anion (CX<sub>3</sub><sup>-</sup>) compounds (X = F, Cl, Br, or I).

## 5.1 NLMO's contributions to the $\sigma^{\text{dia}}$

**Table S14:** NLMO's contributions<sup>a</sup> to the  $\sigma^{\text{dia}}$  of the  $\sigma^{13}\text{C}$  NMR obtained for  $\text{CHX}_3$ ,  $\text{CX}_3^+$ , and  $\text{CX}_3^-$  ( $\text{X} = \text{F}, \text{Cl}, \text{Br}$  or  $\text{I}$ ) compounds.

| Parent NBO                                                 | Neutral ( $\text{CHX}_3$ ) |        |        |        | Cation ( $\text{CX}_3^+$ ) |        |        |        | Anion ( $\text{CX}_3^-$ ) |        |        |        |
|------------------------------------------------------------|----------------------------|--------|--------|--------|----------------------------|--------|--------|--------|---------------------------|--------|--------|--------|
|                                                            | F                          | Cl     | Br     | I      | F                          | Cl     | Br     | I      | F                         | Cl     | Br     | I      |
| <b>CR(C1)</b>                                              | 200.58                     | 200.57 | 200.57 | 200.57 | 200.61                     | 200.59 | 200.59 | 200.59 | 200.44                    | 200.40 | 200.37 | 200.38 |
| <b><math>\Sigma\text{CR}(\text{X})^{\text{b}}</math></b>   | 0.14                       | 0.06   | -0.06  | 0.30   | 0.16                       | 0.04   | -0.04  | 0.56   | 0.10                      | 0.06   | -0.01  | 0.23   |
| $\sigma_{\text{C1-X2}}$                                    | 7.83                       | 11.10  | 10.20  | 6.58   | 8.93                       | 14.68  | 14.32  | 13.52  | 5.38                      | 5.85   | 3.36   | 3.58   |
| $\sigma_{\text{C1-X3}}$                                    | 7.83                       | 11.10  | 10.18  | 6.59   | 8.94                       | 14.67  | 14.32  | 13.44  | 5.38                      | 5.84   | 3.37   | 3.58   |
| $\sigma_{\text{C1-X4}}$                                    | 7.83                       | 11.06  | 10.18  | 6.57   | 8.94                       | 14.68  | 14.32  | 13.44  | 5.38                      | 5.86   | 3.36   | 3.56   |
| $\sigma_{\text{C1-H5}}$                                    | 21.62                      | 9.66   | 12.55  | 5.84   | -                          | -      | -      | -      | -                         | -      | -      | -      |
| $\pi_{\text{C1-X2}}$                                       | -                          | -      | -      | -      | 7.03                       | 8.10   | 8.01   | 8.10   | -                         | -      | -      | -      |
| <b>LP(C1)</b>                                              | -                          | -      | -      | -      | -                          | -      | -      | -      | 29.53                     | 22.94  | 25.10  | 26.62  |
| <b><math>\Sigma\text{LP}_1(\text{X})^{\text{b}}</math></b> | 6.68                       | 4.27   | 3.67   | 3.07   | 7.06                       | 5.21   | 4.05   | 3.78   | 5.43                      | 4.33   | 3.51   | 3.37   |
| <b><math>\Sigma\text{LP}_2(\text{X})^{\text{b}}</math></b> | 7.52                       | 4.02   | 4.17   | 3.22   | 12.61                      | 7.10   | 5.63   | 3.70   | 4.78                      | 4.30   | 4.29   | 3.66   |
| <b><math>\Sigma\text{LP}_3(\text{X})^{\text{b}}</math></b> | 7.86                       | 5.92   | 5.18   | 3.68   | 10.84                      | 10.53  | 9.77   | 8.89   | 6.20                      | 5.15   | 4.85   | 3.77   |
| $\sigma_{\text{C1-X2}}^*$                                  | 0.00                       | 0.00   | 0.01   | 0.04   | 0.00                       | 0.00   | 0.00   | 0.00   | 0.00                      | 0.00   | 0.01   | 0.05   |
| $\sigma_{\text{C1-X3}}^*$                                  | 0.00                       | 0.00   | 0.01   | 0.04   | 0.00                       | 0.00   | 0.00   | 0.00   | 0.00                      | 0.00   | 0.01   | 0.05   |
| $\sigma_{\text{C1-X4}}^*$                                  | 0.00                       | 0.00   | 0.01   | 0.04   | 0.00                       | 0.00   | 0.00   | 0.00   | 0.00                      | 0.00   | 0.01   | 0.05   |
| $\sigma_{\text{C1-H5}}^*$                                  | 0.00                       | 0.00   | 0.00   | -0.01  | -                          | -      | -      | -      | -                         | -      | -      | -      |
| $\pi_{\text{C1-X2}}^*$                                     | -                          | -      | -      | -      | 0.00                       | 0.00   | 0.03   | 0.14   | -                         | -      | -      | -      |
| <b><math>\Sigma\text{RY}(\text{C1})^{\text{c}}</math></b>  | 0.00                       | 0.00   | -0.03  | -0.19  | 0.00                       | 0.00   | -0.03  | -0.06  | 0.00                      | 0.00   | -0.02  | -0.01  |
| <b><math>\Sigma\text{RY}(\text{X})^{\text{b,c}}</math></b> | 0.00                       | 0.00   | 0.02   | 0.16   | 0.00                       | 0.00   | 0.02   | 0.09   | 0.00                      | 0.00   | 0.01   | 0.04   |
| <b><math>\Sigma\text{RY}(\text{H})^{\text{c}}</math></b>   | 0.00                       | 0.00   | -0.01  | -0.05  | -                          | -      | -      | -      | -                         | -      | -      | -      |
| <b><math>\Sigma_{\text{total}}^{\text{d}}</math></b>       | 267.88                     | 257.75 | 256.62 | 236.44 | 265.10                     | 275.61 | 270.97 | 266.17 | 262.61                    | 254.72 | 248.20 | 248.93 |

<sup>a</sup> in ppm. <sup>b</sup> Sum of halogen atom contributions. <sup>c</sup> Sum of Rydberg's contributions. <sup>d</sup> Sum of all NLMO's contributions.

## 5.2 NLMO's contributions to the $\sigma^{\text{para}}$

**Table S15:** NLMO's contributions<sup>a</sup> to the  $\sigma^{\text{para}}$  of the  $\sigma^{13\text{C}}$  NMR obtained for  $\text{CHX}_3$ ,  $\text{CX}_3^+$ , and  $\text{CX}_3^-$  (X = F, Cl, Br, or I) compounds.

| Parent NBO                                                  | Neutral ( $\text{CHX}_3$ ) |         |         |         | Cation ( $\text{CX}_3^+$ ) |         |         |         | Anion ( $\text{CX}_3^-$ ) |         |         |         |
|-------------------------------------------------------------|----------------------------|---------|---------|---------|----------------------------|---------|---------|---------|---------------------------|---------|---------|---------|
|                                                             | F                          | Cl      | Br      | I       | F                          | Cl      | Br      | I       | F                         | Cl      | Br      | I       |
| <b>CR(C1)</b>                                               | 0.00                       | 0.00    | 0.00    | 0.00    | 0.00                       | 0.00    | 0.00    | 0.00    | 0.00                      | -0.03   | 0.00    | 0.00    |
| <b><math>\Sigma\text{CR(X)}</math><sup>b</sup></b>          | 0.33                       | -0.15   | 0.34    | 0.21    | 0.39                       | -0.18   | 0.43    | 0.24    | 0.31                      | -0.12   | 0.20    | 0.09    |
| $\sigma_{\text{C1-X2}}$                                     | -38.28                     | -35.01  | -33.88  | -20.07  | -61.27                     | -97.99  | -112.83 | -131.66 | -41.88                    | -51.20  | -62.76  | -61.70  |
| $\sigma_{\text{C1-X3}}$                                     | -38.28                     | -35.01  | -33.89  | -20.05  | -61.29                     | -97.98  | -112.77 | -132.50 | -41.86                    | -51.00  | -62.77  | -61.70  |
| $\sigma_{\text{C1-X4}}$                                     | -38.28                     | -34.99  | -33.90  | -20.04  | -61.29                     | -97.98  | -112.77 | -132.50 | -41.87                    | -51.14  | -62.76  | -61.71  |
| $\sigma_{\text{C1-H5}}$                                     | -67.85                     | -52.41  | -48.08  | -34.23  | -                          | -       | -       | -       | -                         | -       | -       | -       |
| $\pi_{\text{C1-X2}}$                                        | -                          | -       | -       | -       | -15.52                     | -21.96  | -26.70  | -31.58  | -                         | -       | -       | -       |
| <b>LP(C1)</b>                                               | -                          | -       | -       | -       | -                          | -       | -       | -       | -115.34                   | -85.09  | -61.24  | -37.77  |
| <b><math>\Sigma\text{LP}_1(\text{X})</math><sup>b</sup></b> | -13.62                     | -10.33  | -13.03  | -16.07  | -27.42                     | -27.23  | -32.09  | -37.19  | -13.21                    | -18.63  | -23.63  | -30.45  |
| <b><math>\Sigma\text{LP}_2(\text{X})</math><sup>b</sup></b> | -5.07                      | -3.52   | -2.90   | -0.03   | 4.40                       | 7.99    | 7.80    | -1.56   | -3.11                     | -2.56   | -4.61   | -4.31   |
| <b><math>\Sigma\text{LP}_3(\text{X})</math><sup>b</sup></b> | -9.31                      | -8.23   | -8.62   | -6.66   | -22.74                     | -25.67  | -29.00  | -30.85  | -8.31                     | -9.94   | -9.19   | -7.80   |
| $\sigma_{\text{C1-X2}}^*$                                   | 0.00                       | 0.00    | 0.00    | 0.00    | 0.00                       | 0.00    | 0.00    | 0.00    | 0.00                      | 0.00    | 0.00    | 0.00    |
| $\sigma_{\text{C1-X3}}^*$                                   | 0.00                       | 0.00    | 0.00    | 0.00    | 0.00                       | 0.00    | 0.00    | 0.00    | 0.00                      | 0.00    | 0.00    | 0.00    |
| $\sigma_{\text{C1-X4}}^*$                                   | 0.00                       | 0.00    | 0.00    | 0.00    | 0.00                       | 0.00    | 0.00    | 0.00    | 0.00                      | 0.00    | 0.00    | 0.00    |
| $\sigma_{\text{C1-H5}}^*$                                   | 0.00                       | 0.00    | 0.00    | 0.00    | -                          | -       | -       | -       | -                         | -       | -       | -       |
| $\pi_{\text{C1-X2}}^*$                                      | -                          | -       | -       | -       | 0.00                       | 0.00    | 0.00    | 0.00    | -                         | -       | -       | -       |
| <b><math>\Sigma\text{RY(C1)}</math><sup>c</sup></b>         | 0.00                       | 0.00    | 0.00    | 0.00    | 0.00                       | 0.00    | 0.00    | 0.00    | 0.00                      | 0.00    | 0.00    | 0.00    |
| <b><math>\Sigma\text{RY(X)}</math><sup>b,c</sup></b>        | 0.00                       | 0.00    | 0.00    | 0.00    | 0.00                       | 0.00    | 0.00    | 0.00    | 0.00                      | 0.00    | 0.00    | 0.00    |
| <b><math>\Sigma\text{RY(H)}</math><sup>c</sup></b>          | 0.00                       | 0.00    | 0.00    | 0.00    | -                          | -       | -       | -       | -                         | -       | -       | -       |
| <b><math>\Sigma_{\text{total}}</math><sup>d</sup></b>       | -210.36                    | -179.65 | -173.95 | -116.94 | -244.73                    | -361.00 | -417.93 | -497.59 | -265.26                   | -269.71 | -286.76 | -265.34 |

<sup>a</sup> in ppm. <sup>b</sup> Sum of halogen atom contributions. <sup>c</sup> Sum of Rydberg's contributions. <sup>d</sup> Sum of all NLMO's contributions.

### 5.3 NLMO's contributions to the $\sigma^{\text{SO}}$

**Table S16:** NLMO's contributions<sup>a</sup> to the  $\sigma^{\text{SO}}$  of the  $\sigma^{13\text{C}}$  NMR obtained for  $\text{CHX}_3$ ,  $\text{CX}_3^+$ , and  $\text{CX}_3^-$  ( $\text{X} = \text{F}, \text{Cl}, \text{Br}, \text{or I}$ ) compounds.

| Parent NBO                                                 | Neutral ( $\text{CHX}_3$ ) |       |        |        | Cation ( $\text{CX}_3^+$ ) |       |        |         | Anion ( $\text{CX}_3^-$ ) |       |        |         |
|------------------------------------------------------------|----------------------------|-------|--------|--------|----------------------------|-------|--------|---------|---------------------------|-------|--------|---------|
|                                                            | F                          | Cl    | Br     | I      | F                          | Cl    | Br     | I       | F                         | Cl    | Br     | I       |
| <b>CR(C1)</b>                                              | 0.64                       | 0.60  | 0.37   | 0.26   | 0.46                       | -0.39 | -4.57  | -9.48   | 0.64                      | -0.41 | -7.01  | -34.68  |
| <b><math>\Sigma\text{CR(X)}^{\text{b}}</math></b>          | 0.00                       | 0.00  | 0.00   | 0.03   | 0.00                       | 0.00  | 0.00   | 0.03    | 0.00                      | 0.00  | 0.00   | 0.03    |
| $\sigma_{\text{C1-X2}}$                                    | 0.25                       | 2.75  | 16.59  | 49.56  | 0.55                       | 4.43  | 25.86  | 70.39   | 0.24                      | 2.20  | 12.32  | 45.05   |
| $\sigma_{\text{C1-X3}}$                                    | 0.25                       | 2.75  | 16.51  | 49.56  | 0.55                       | 4.43  | 25.87  | 69.66   | 0.24                      | 2.19  | 12.34  | 45.18   |
| $\sigma_{\text{C1-X4}}$                                    | 0.25                       | 2.74  | 16.48  | 49.09  | 0.55                       | 4.43  | 25.87  | 69.66   | 0.24                      | 2.20  | 12.35  | 44.96   |
| $\sigma_{\text{C1-H5}}$                                    | 0.39                       | -0.87 | -8.17  | -31.19 | -                          | -     | -      | -       | -                         | -     | -      | -       |
| $\pi_{\text{C1-X2}}$                                       | -                          | -     | -      | -      | -0.05                      | -0.26 | -1.36  | -2.81   | -                         | -     | -      | -       |
| <b>LP(C1)</b>                                              | -                          | -     | -      | -      | -                          | -     | -      | -       | 0.59                      | -6.93 | -56.64 | -274.62 |
| <b><math>\Sigma\text{LP}_1(\text{X})^{\text{b}}</math></b> | 0.15                       | 0.69  | 3.33   | 7.95   | 0.35                       | 1.32  | 6.68   | 16.02   | 0.17                      | 0.72  | 3.34   | 10.59   |
| <b><math>\Sigma\text{LP}_2(\text{X})^{\text{b}}</math></b> | 0.01                       | 0.22  | 1.07   | 2.23   | -0.04                      | -0.15 | -0.62  | -0.61   | 0.02                      | -0.05 | 0.47   | -3.93   |
| <b><math>\Sigma\text{LP}_3(\text{X})^{\text{b}}</math></b> | -0.02                      | 0.00  | 0.07   | 0.28   | -0.06                      | -0.29 | -1.39  | -2.54   | -0.02                     | -0.01 | -0.02  | 0.03    |
| $\sigma_{\text{C1-X2}}^*$                                  | 0.10                       | 3.45  | 18.75  | 45.59  | 0.01                       | 3.37  | 22.35  | 64.59   | 0.16                      | 2.29  | 7.94   | 13.29   |
| $\sigma_{\text{C1-X3}}^*$                                  | 0.10                       | 3.33  | 18.09  | 44.89  | 0.01                       | 3.36  | 22.34  | 61.05   | 0.16                      | 2.18  | 7.66   | 12.26   |
| $\sigma_{\text{C1-X4}}^*$                                  | 0.10                       | 3.21  | 17.45  | 43.07  | 0.01                       | 3.36  | 22.34  | 61.05   | 0.16                      | 2.24  | 8.23   | 12.77   |
| $\sigma_{\text{C1-H5}}^*$                                  | 0.01                       | -0.02 | 0.21   | 0.39   | -                          | -     | -      | -       | -                         | -     | -      | -       |
| $\pi_{\text{C1-X2}}^*$                                     | -                          | -     | -      | -      | -0.09                      | -0.52 | -2.81  | -7.10   | -                         | -     | -      | -       |
| <b><math>\Sigma\text{RY}(\text{C1})^{\text{c}}</math></b>  | -0.05                      | 1.69  | 1.97   | -17.03 | 0.81                       | 2.07  | 16.96  | 49.19   | 0.43                      | 3.43  | 12.42  | 39.67   |
| <b><math>\Sigma\text{RY}(\text{X})^{\text{b,c}}</math></b> | 0.35                       | -5.06 | -16.71 | -11.20 | -0.30                      | -4.96 | -39.85 | -114.29 | -0.34                     | -5.60 | -17.81 | -37.89  |
| <b><math>\Sigma\text{RY}(\text{H})^{\text{c}}</math></b>   | -0.01                      | 0.04  | -2.09  | -4.60  | -                          | -     | -      | -       | -                         | -     | -      | -       |
| <b><math>\Sigma_{\text{total}}^{\text{d}}</math></b>       | 2.54                       | 15.49 | 83.91  | 228.87 | 2.76                       | 20.19 | 117.66 | 324.79  | 2.69                      | 4.46  | -4.41  | -127.30 |

<sup>a</sup> in ppm. <sup>b</sup> Sum of halogen atom contributions. <sup>c</sup> Sum of Rydberg's contributions. <sup>d</sup> Sum of all NLMO's contributions.

## 5.4 NLMO's contributions to the $\sigma$

**Table S17:** NLMO's contributions<sup>a</sup> to the  $\sigma$  of the  $\sigma^{13}\text{C}$  NMR obtained for  $\text{CHX}_3$ ,  $\text{CX}_3^+$ , and  $\text{CX}_3^-$  (X = F, Cl, Br, or I) compounds.

| Parent NBO                                                 | Neutral ( $\text{CHX}_3$ ) |        |        |        | Cation ( $\text{CX}_3^+$ ) |        |        |         | Anion ( $\text{CX}_3^-$ ) |        |        |         |
|------------------------------------------------------------|----------------------------|--------|--------|--------|----------------------------|--------|--------|---------|---------------------------|--------|--------|---------|
|                                                            | F                          | Cl     | Br     | I      | F                          | Cl     | Br     | I       | F                         | Cl     | Br     | I       |
| <b>CR(C1)</b>                                              | 201.22                     | 201.17 | 200.93 | 200.83 | 201.07                     | 200.20 | 196.02 | 191.10  | 201.09                    | 199.96 | 193.36 | 165.70  |
| <b><math>\Sigma\text{CR(X)}^{\text{b}}</math></b>          | 0.47                       | -0.10  | 0.27   | 0.54   | 0.54                       | -0.14  | 0.39   | 0.83    | 0.41                      | -0.05  | 0.18   | 0.34    |
| $\sigma_{\text{C1-X2}}$                                    | -30.20                     | -21.16 | -7.10  | 36.07  | -51.78                     | -78.89 | -72.65 | -47.75  | -36.26                    | -43.14 | -47.08 | -13.06  |
| $\sigma_{\text{C1-X3}}$                                    | -30.20                     | -21.17 | -7.20  | 36.10  | -51.80                     | -78.87 | -72.58 | -49.41  | -36.25                    | -42.97 | -47.06 | -12.95  |
| $\sigma_{\text{C1-X4}}$                                    | -30.20                     | -21.19 | -7.25  | 35.62  | -51.80                     | -78.87 | -72.58 | -49.41  | -36.26                    | -43.08 | -47.05 | -13.19  |
| $\sigma_{\text{C1-H5}}$                                    | -45.84                     | -43.62 | -43.71 | -59.58 | -                          | -      | -      | -       | -                         | -      | -      | -       |
| $\pi_{\text{C1-X2}}$                                       | -                          | -      | -      | -      | -8.54                      | -14.12 | -20.04 | -26.30  | -                         | -      | -      | -       |
| <b>LP(C1)</b>                                              | -                          | -      | -      | -      | -                          | -      | -      | -       | -85.22                    | -69.08 | -92.77 | -285.78 |
| <b><math>\Sigma\text{LP}_1(\text{X})^{\text{b}}</math></b> | -6.80                      | -5.38  | -6.03  | -5.05  | -20.02                     | -20.70 | -21.37 | -17.40  | -7.61                     | -13.58 | -16.79 | -16.48  |
| <b><math>\Sigma\text{LP}_2(\text{X})^{\text{b}}</math></b> | 2.47                       | 0.72   | 2.34   | 5.42   | 16.97                      | 14.93  | 12.81  | 1.52    | 1.69                      | 1.68   | 0.15   | -4.57   |
| <b><math>\Sigma\text{LP}_3(\text{X})^{\text{b}}</math></b> | -1.48                      | -2.31  | -3.37  | -2.70  | -11.97                     | -15.43 | -20.62 | -24.50  | -2.13                     | -4.80  | -4.35  | -4.00   |
| $\sigma_{\text{C1-X2}}^*$                                  | 0.10                       | 3.45   | 18.76  | 45.63  | 0.01                       | 3.37   | 22.35  | 64.59   | 0.16                      | 2.29   | 7.95   | 13.34   |
| $\sigma_{\text{C1-X3}}^*$                                  | 0.10                       | 3.33   | 18.10  | 44.93  | 0.01                       | 3.36   | 22.34  | 61.05   | 0.16                      | 2.18   | 7.67   | 12.30   |
| $\sigma_{\text{C1-X4}}^*$                                  | 0.10                       | 3.21   | 17.46  | 43.11  | 0.01                       | 3.36   | 22.34  | 61.05   | 0.16                      | 2.24   | 8.23   | 12.82   |
| $\sigma_{\text{C1-H5}}^*$                                  | 0.01                       | -0.02  | 0.21   | 0.38   | -                          | -      | -      | -       | -                         | -      | -      | -       |
| $\pi_{\text{C1-X2}}^*$                                     | -                          | -      | -      | -      | -0.09                      | -0.52  | -2.79  | -6.96   | -                         | -      | -      | -       |
| <b><math>\Sigma\text{RY}(\text{C1})^{\text{c}}</math></b>  | -0.05                      | 1.68   | 1.94   | -17.22 | 0.81                       | 2.07   | 16.93  | 49.12   | 0.43                      | 3.43   | 12.40  | 39.66   |
| <b><math>\Sigma\text{RY}(\text{X})^{\text{b,c}}</math></b> | 0.35                       | -5.06  | -16.69 | -11.04 | -0.30                      | -4.96  | -39.84 | -114.20 | -0.34                     | -5.60  | -17.81 | -37.84  |
| <b><math>\Sigma\text{RY}(\text{H})^{\text{c}}</math></b>   | -0.01                      | 0.04   | -2.10  | -4.65  | -                          | -      | -      | -       | -                         | -      | -      | -       |
| <b><math>\Sigma_{\text{total}}^{\text{d}}</math></b>       | 60.06                      | 93.59  | 166.58 | 348.37 | 23.13                      | -65.21 | -29.30 | 93.37   | 0.03                      | -10.52 | -42.96 | -143.71 |

<sup>a</sup> in ppm. <sup>b</sup> Sum of halogen atom contributions. <sup>c</sup> Sum of Rydberg's contributions. <sup>d</sup> Sum of all NLMO's contributions.

## 6 NLMO's contributions to the $\sigma^{13}\text{C}$ NMR in terms of principal axis system (PAS)

NLMO's contributions to diamagnetic, paramagnetic, and spin-orbit operators decomposed in terms of principal axis system ( $\sigma_{xx}$ ,  $\sigma_{yy}$ , and  $\sigma_{zz}$ ) of the  $\sigma^{13}\text{C}$  NMR are displayed in Tables S18-S29.

### 6.1 NLMO's contributions to the $\sigma^{\text{dia}}$

#### 6.1.1 Neutral ( $\text{CHX}_3$ )

**Table S18:** NLMO's contributions<sup>a</sup> to the  $\sigma^{\text{dia}}$  in terms of principal axis system ( $\sigma_{xx}$ ,  $\sigma_{yy}$ , and  $\sigma_{zz}$ ) for  $\text{CHX}_3$  (X = F, Cl, Br, or I) compounds.

| Parent NBO                                                 | F             |               |               | Cl            |               |               | Br            |               |               | I             |               |               |
|------------------------------------------------------------|---------------|---------------|---------------|---------------|---------------|---------------|---------------|---------------|---------------|---------------|---------------|---------------|
|                                                            | $\sigma_{xx}$ | $\sigma_{yy}$ | $\sigma_{zz}$ |
| <b>CR(C1)</b>                                              | 200.58        | 200.58        | 200.58        | 200.57        | 200.57        | 200.57        | 200.57        | 200.57        | 200.57        | 200.57        | 200.57        | 200.56        |
| <b><math>\Sigma\text{CR(X)}^{\text{b}}</math></b>          | 0.17          | 0.17          | 0.09          | 0.48          | 0.48          | -0.80         | 1.47          | 1.47          | -3.12         | 2.97          | 2.97          | -5.05         |
| $\sigma_{\text{C1-X2}}$                                    | 6.67          | 10.93         | 5.89          | 10.98         | 11.15         | 11.17         | 10.19         | 10.19         | 10.21         | 5.01          | 7.66          | 7.09          |
| $\sigma_{\text{C1-X3}}$                                    | 9.30          | 8.31          | 5.89          | 10.99         | 11.13         | 11.17         | 10.86         | 9.51          | 10.19         | 8.53          | 4.15          | 7.10          |
| $\sigma_{\text{C1-X4}}$                                    | 10.43         | 7.17          | 5.89          | 11.21         | 10.85         | 11.12         | 9.50          | 10.85         | 10.18         | 5.47          | 7.20          | 7.04          |
| $\sigma_{\text{C1-H5}}$                                    | 24.78         | 24.78         | 15.30         | 6.62          | 6.62          | 15.74         | 10.92         | 10.92         | 15.79         | 1.03          | 1.03          | 15.46         |
| <b><math>\Sigma\text{LP}_1(\text{X})^{\text{b}}</math></b> | 6.73          | 6.73          | 6.57          | 4.82          | 4.82          | 3.17          | 4.43          | 4.43          | 2.15          | 4.03          | 4.03          | 1.15          |
| <b><math>\Sigma\text{LP}_2(\text{X})^{\text{b}}</math></b> | 10.43         | 10.43         | 1.71          | 5.93          | 5.91          | 0.23          | 5.98          | 5.99          | 0.53          | 4.58          | 4.59          | 0.48          |
| <b><math>\Sigma\text{LP}_3(\text{X})^{\text{b}}</math></b> | 6.81          | 6.81          | 9.94          | 5.25          | 5.25          | 7.24          | 4.67          | 4.68          | 6.18          | 3.69          | 3.70          | 3.66          |
| $\sigma_{\text{C1-X2}}^*$                                  | 0.00          | 0.00          | 0.00          | 0.00          | 0.00          | 0.00          | 0.01          | 0.01          | 0.00          | 0.04          | 0.06          | 0.02          |
| $\sigma_{\text{C1-X3}}^*$                                  | 0.00          | 0.00          | 0.00          | 0.00          | 0.00          | 0.00          | 0.01          | 0.00          | 0.00          | 0.07          | 0.03          | 0.02          |
| $\sigma_{\text{C1-X4}}^*$                                  | 0.00          | 0.00          | 0.00          | 0.00          | 0.00          | 0.00          | 0.00          | 0.01          | 0.00          | 0.04          | 0.06          | 0.02          |
| $\sigma_{\text{C1-H5}}^*$                                  | 0.00          | 0.00          | 0.00          | 0.00          | 0.00          | 0.00          | 0.00          | 0.00          | 0.00          | -0.01         | -0.01         | -0.01         |
| <b><math>\Sigma\text{RY(C1)}^{\text{c}}</math></b>         | 0.00          | 0.00          | 0.00          | 0.00          | 0.00          | 0.00          | -0.02         | -0.02         | -0.04         | -0.13         | -0.13         | -0.31         |
| <b><math>\Sigma\text{RY(X)}^{\text{b,c}}</math></b>        | 0.00          | 0.00          | 0.00          | 0.00          | 0.00          | 0.00          | 0.02          | 0.02          | 0.03          | 0.10          | 0.11          | 0.26          |
| <b><math>\Sigma\text{RY(H)}^{\text{c}}</math></b>          | 0.00          | 0.00          | 0.00          | 0.00          | 0.00          | 0.00          | -0.02         | -0.02         | 0.00          | -0.09         | -0.09         | 0.01          |
| <b><math>\Sigma_{\text{total}}^{\text{d}}</math></b>       | 275.90        | 275.90        | 251.85        | 256.86        | 256.78        | 259.61        | 258.59        | 258.62        | 252.66        | 235.90        | 235.92        | 237.51        |

<sup>a</sup> in ppm. <sup>b</sup> Sum of halogen atom contributions. <sup>c</sup> Sum of Rydberg's contributions. <sup>d</sup> Sum of all NLMO's contributions.



## 6.1.2 Cation (CX<sub>3</sub><sup>+</sup>)

**Table S19:** NLMO's contributions<sup>a</sup> to the  $\sigma^{\text{dia}}$  in terms of principal axis system ( $\sigma_{xx}$ ,  $\sigma_{yy}$ , and  $\sigma_{zz}$ ) for CX<sub>3</sub><sup>+</sup> (X = F, Cl, Br, or I) compounds.

| Parent NBO                                              | F             |               |               | Cl            |               |               | Br            |               |               | I             |               |               |
|---------------------------------------------------------|---------------|---------------|---------------|---------------|---------------|---------------|---------------|---------------|---------------|---------------|---------------|---------------|
|                                                         | $\sigma_{xx}$ | $\sigma_{yy}$ | $\sigma_{zz}$ |
| <b>CR(C1)</b>                                           | 200.60        | 200.60        | 200.62        | 200.59        | 200.59        | 200.60        | 200.59        | 200.59        | 200.59        | 200.59        | 200.59        | 200.59        |
| <b><math>\Sigma</math>CR(X)<sup>b</sup></b>             | 0.21          | 0.21          | 0.05          | 0.79          | 0.79          | -1.45         | 2.49          | 2.49          | -5.10         | 4.56          | 4.56          | -7.44         |
| $\sigma_{\text{C1-X2}}$                                 | 7.63          | 11.94         | 7.24          | 14.83         | 14.12         | 15.07         | 14.05         | 14.51         | 14.39         | 12.49         | 15.05         | 13.01         |
| $\sigma_{\text{C1-X3}}$                                 | 10.86         | 8.71          | 7.24          | 14.29         | 14.66         | 15.08         | 14.40         | 14.17         | 14.39         | 14.35         | 13.04         | 12.92         |
| $\sigma_{\text{C1-X4}}$                                 | 10.86         | 8.71          | 7.24          | 14.29         | 14.66         | 15.08         | 14.40         | 14.17         | 14.39         | 14.35         | 13.04         | 12.92         |
| $\pi_{\text{C1-X2}}$                                    | 9.90          | 7.65          | 3.52          | 11.02         | 9.35          | 3.74          | 10.74         | 9.54          | 3.74          | 10.69         | 9.88          | 3.72          |
| <b><math>\Sigma</math>LP<sub>1</sub>(X)<sup>b</sup></b> | 6.89          | 6.88          | 7.41          | 5.58          | 5.59          | 4.46          | 4.68          | 4.69          | 2.77          | 4.45          | 4.46          | 2.42          |
| <b><math>\Sigma</math>LP<sub>2</sub>(X)<sup>b</sup></b> | 9.86          | 9.87          | 18.08         | 6.26          | 6.25          | 8.80          | 5.27          | 5.26          | 6.37          | 4.06          | 4.05          | 2.97          |
| <b><math>\Sigma</math>LP<sub>3</sub>(X)<sup>b</sup></b> | 12.74         | 14.99         | 4.80          | 12.82         | 14.50         | 4.27          | 12.23         | 13.43         | 3.66          | 11.39         | 12.20         | 3.10          |
| $\sigma_{\text{C1-X2}}^*$                               | 0.00          | 0.00          | 0.00          | 0.00          | 0.00          | 0.00          | 0.00          | 0.01          | -0.01         | 0.00          | 0.06          | -0.05         |
| $\sigma_{\text{C1-X3}}^*$                               | 0.00          | 0.00          | 0.00          | 0.00          | 0.00          | 0.00          | 0.01          | 0.00          | -0.01         | 0.04          | 0.01          | -0.05         |
| $\sigma_{\text{C1-X4}}^*$                               | 0.00          | 0.00          | 0.00          | 0.00          | 0.00          | 0.00          | 0.01          | 0.00          | -0.01         | 0.04          | 0.01          | -0.05         |
| $\pi_{\text{C1-X2}}^*$                                  | 0.00          | 0.00          | 0.00          | 0.00          | 0.00          | 0.00          | 0.03          | 0.03          | 0.01          | 0.17          | 0.18          | 0.08          |
| <b><math>\Sigma</math>RY(C1)<sup>c</sup></b>            | 0.00          | 0.00          | 0.00          | 0.00          | 0.00          | 0.00          | -0.02         | -0.03         | -0.05         | -0.03         | -0.04         | -0.13         |
| <b><math>\Sigma</math>RY(X)<sup>b,c</sup></b>           | 0.00          | 0.00          | 0.00          | 0.00          | 0.00          | 0.00          | 0.02          | 0.01          | 0.03          | 0.04          | 0.04          | 0.19          |
| <b><math>\Sigma_{\text{total}}^{\text{d}}</math></b>    | 269.55        | 269.56        | 256.20        | 280.49        | 280.49        | 265.84        | 278.86        | 278.87        | 255.18        | 277.18        | 277.14        | 244.20        |

<sup>a</sup> in ppm. <sup>b</sup> Sum of halogen atom contributions. <sup>c</sup> Sum of Rydberg's contributions. <sup>d</sup> Sum of all NLMO's contributions.

### 6.1.3 Anion (CX<sub>3</sub><sup>-</sup>)

**Table S20:** NLMO's contributions<sup>a</sup> to the  $\sigma^{\text{dia}}$  in terms of principal axis system ( $\sigma_{xx}$ ,  $\sigma_{yy}$ , and  $\sigma_{zz}$ ) for CX<sub>3</sub><sup>-</sup> (X = F, Cl, Br, or I) compounds.

| Parent NBO                                              | F             |               |               | Cl            |               |               | Br            |               |               | I             |               |               |
|---------------------------------------------------------|---------------|---------------|---------------|---------------|---------------|---------------|---------------|---------------|---------------|---------------|---------------|---------------|
|                                                         | $\sigma_{xx}$ | $\sigma_{yy}$ | $\sigma_{zz}$ |
| <b>CR(C1)</b>                                           | 200.44        | 200.44        | 200.45        | 200.39        | 200.39        | 200.40        | 200.37        | 200.37        | 200.37        | 200.38        | 200.38        | 200.38        |
| <b><math>\Sigma</math>CR(X)<sup>b</sup></b>             | 0.11          | 0.11          | 0.08          | 0.29          | 0.29          | -0.38         | 0.82          | 0.82          | -1.68         | 1.81          | 1.81          | -2.94         |
| $\sigma_{\text{C1-X2}}$                                 | 6.27          | 4.71          | 5.17          | 6.57          | 5.76          | 5.22          | 3.58          | 3.91          | 2.59          | 5.31          | 3.22          | 2.22          |
| $\sigma_{\text{C1-X3}}$                                 | 4.41          | 6.56          | 5.16          | 4.63          | 7.69          | 5.21          | 6.29          | 1.22          | 2.60          | 6.42          | 2.11          | 2.21          |
| $\sigma_{\text{C1-X4}}$                                 | 5.78          | 5.19          | 5.16          | 7.30          | 5.05          | 5.23          | 1.38          | 6.11          | 2.59          | 1.04          | 7.46          | 2.18          |
| <b>LP(C1)</b>                                           | 32.28         | 32.28         | 24.02         | 21.67         | 21.67         | 25.49         | 24.09         | 24.09         | 27.13         | 26.05         | 26.05         | 27.76         |
| <b><math>\Sigma</math>LP<sub>1</sub>(X)<sup>b</sup></b> | 5.41          | 5.41          | 5.48          | 5.02          | 5.02          | 2.96          | 4.29          | 4.29          | 1.95          | 4.30          | 4.30          | 1.51          |
| <b><math>\Sigma</math>LP<sub>2</sub>(X)<sup>b</sup></b> | 6.09          | 6.09          | 2.17          | 5.34          | 5.34          | 2.22          | 5.37          | 5.33          | 2.18          | 4.60          | 4.61          | 1.77          |
| <b><math>\Sigma</math>LP<sub>3</sub>(X)<sup>b</sup></b> | 5.49          | 5.49          | 7.61          | 4.46          | 4.46          | 6.52          | 4.15          | 4.20          | 6.20          | 3.47          | 3.48          | 4.35          |
| $\sigma_{\text{C1-X2}}^*$                               | 0.00          | 0.00          | 0.00          | 0.00          | 0.00          | 0.00          | 0.00          | 0.00          | 0.01          | 0.05          | 0.05          | 0.05          |
| $\sigma_{\text{C1-X3}}^*$                               | 0.00          | 0.00          | 0.00          | 0.00          | 0.00          | 0.00          | 0.00          | 0.00          | 0.01          | 0.05          | 0.05          | 0.05          |
| $\sigma_{\text{C1-X4}}^*$                               | 0.00          | 0.00          | 0.00          | 0.00          | 0.00          | 0.00          | 0.00          | 0.00          | 0.01          | 0.05          | 0.05          | 0.05          |
| <b><math>\Sigma</math>RY(C1)<sup>c</sup></b>            | 0.00          | 0.00          | 0.00          | 0.00          | 0.00          | 0.00          | -0.01         | 0.00          | -0.04         | 0.06          | 0.06          | -0.14         |
| <b><math>\Sigma</math>RY(X)<sup>b,c</sup></b>           | 0.00          | 0.00          | 0.00          | 0.00          | 0.00          | 0.00          | 0.02          | 0.01          | 0.00          | 0.00          | 0.00          | 0.12          |
| <b><math>\Sigma_{\text{total}}^{\text{d}}</math></b>    | 266.27        | 266.28        | 255.28        | 255.65        | 255.66        | 252.86        | 250.33        | 250.35        | 243.93        | 253.61        | 253.64        | 239.54        |

<sup>a</sup> in ppm. <sup>b</sup> Sum of halogen atom contributions. <sup>c</sup> Sum of Rydberg's contributions. <sup>d</sup> Sum of all NLMO's contributions.

## 6.2 NLMO's contributions to the $\sigma^{\text{para}}$

### 6.2.1 Neutral (CHX<sub>3</sub>)

**Table S21:** NLMO's contributions<sup>a</sup> to the  $\sigma^{\text{para}}$  in terms of principal axis system ( $\sigma_{xx}$ ,  $\sigma_{yy}$ , and  $\sigma_{zz}$ ) for CHX<sub>3</sub> (X = F, Cl, Br, or I) compounds.

| Parent NBO                                              | F             |               |               | Cl            |               |               | Br            |               |               | I             |               |               |
|---------------------------------------------------------|---------------|---------------|---------------|---------------|---------------|---------------|---------------|---------------|---------------|---------------|---------------|---------------|
|                                                         | $\sigma_{xx}$ | $\sigma_{yy}$ | $\sigma_{zz}$ |
| <b>CR(C1)</b>                                           | 0.00          | 0.00          | 0.00          | 0.00          | 0.00          | 0.00          | 0.00          | 0.00          | 0.00          | 0.00          | 0.00          | 0.00          |
| <b><math>\Sigma</math>CR(X)<sup>b</sup></b>             | 0.29          | 0.29          | 0.41          | -0.03         | -0.05         | -0.22         | 0.28          | 0.28          | 0.45          | 0.18          | 0.18          | 0.28          |
| $\sigma_{\text{C1-X2}}$                                 | -50.50        | -10.77        | -53.56        | -29.07        | -14.57        | -61.39        | -26.00        | -15.93        | -59.72        | -8.05         | -8.73         | -43.44        |
| $\sigma_{\text{C1-X3}}$                                 | -25.99        | -35.27        | -53.57        | -27.77        | -15.85        | -61.41        | -8.41         | -33.43        | -59.82        | -6.14         | -10.62        | -43.38        |
| $\sigma_{\text{C1-X4}}$                                 | -15.40        | -45.86        | -53.57        | -8.57         | -34.93        | -61.47        | -28.38        | -13.42        | -59.88        | -10.87        | -5.68         | -43.57        |
| $\sigma_{\text{C1-H5}}$                                 | -101.93       | -101.93       | 0.31          | -78.71        | -78.61        | 0.09          | -72.16        | -72.18        | 0.10          | -51.52        | -51.47        | 0.28          |
| <b><math>\Sigma</math>LP<sub>1</sub>(X)<sup>b</sup></b> | -9.91         | -9.90         | -21.06        | -8.57         | -8.58         | -13.85        | -10.95        | -10.95        | -17.18        | -13.98        | -13.99        | -20.24        |
| <b><math>\Sigma</math>LP<sub>2</sub>(X)<sup>b</sup></b> | -6.37         | -6.37         | -2.47         | -4.78         | -4.72         | -1.07         | -3.86         | -3.85         | -0.98         | 0.02          | -0.04         | -0.06         |
| <b><math>\Sigma</math>LP<sub>3</sub>(X)<sup>b</sup></b> | -1.62         | -1.62         | -24.70        | -1.06         | -1.06         | -22.56        | -1.96         | -1.96         | -21.93        | -2.03         | -2.02         | -15.93        |
| $\sigma_{\text{C1-X2}}^*$                               | 0.00          | 0.00          | 0.00          | 0.00          | 0.00          | 0.00          | 0.00          | 0.00          | 0.00          | 0.00          | 0.00          | 0.00          |
| $\sigma_{\text{C1-X3}}^*$                               | 0.00          | 0.00          | 0.00          | 0.00          | 0.00          | 0.00          | 0.00          | 0.00          | 0.00          | 0.00          | 0.00          | 0.00          |
| $\sigma_{\text{C1-X4}}^*$                               | 0.00          | 0.00          | 0.00          | 0.00          | 0.00          | 0.00          | 0.00          | 0.00          | 0.00          | 0.00          | 0.00          | 0.00          |
| $\sigma_{\text{C1-H5}}^*$                               | 0.00          | 0.00          | 0.00          | 0.00          | 0.00          | 0.00          | 0.00          | 0.00          | 0.00          | 0.00          | 0.00          | 0.00          |
| <b><math>\Sigma</math>RY(C1)<sup>c</sup></b>            | 0.00          | 0.00          | 0.00          | 0.00          | 0.00          | 0.00          | 0.00          | 0.00          | 0.00          | 0.00          | 0.00          | 0.00          |
| <b><math>\Sigma</math>RY(X)<sup>b,c</sup></b>           | 0.00          | 0.00          | 0.00          | 0.00          | 0.00          | 0.00          | 0.00          | 0.00          | 0.00          | 0.00          | 0.00          | 0.00          |
| <b><math>\Sigma</math>RY(H)<sup>c</sup></b>             | 0.00          | 0.00          | 0.00          | 0.00          | 0.00          | 0.00          | 0.00          | 0.00          | 0.00          | 0.00          | 0.00          | 0.00          |
| <b><math>\Sigma_{\text{total}}^{\text{d}}</math></b>    | -211.44       | -211.43       | -208.21       | -158.60       | -158.41       | -221.94       | -151.45       | -151.45       | -218.96       | -92.40        | -92.38        | -166.05       |

<sup>a</sup> in ppm. <sup>b</sup> Sum of halogen atom contributions. <sup>c</sup> Sum of Rydberg's contributions. <sup>d</sup> Sum of all NLMO's contributions.

## 6.2.2 Cation (CX<sub>3</sub><sup>+</sup>)

**Table S22:** NLMO's contributions<sup>a</sup> to the  $\sigma^{\text{para}}$  in terms of principal axis system ( $\sigma_{xx}$ ,  $\sigma_{yy}$ , and  $\sigma_{zz}$ ) for CX<sub>3</sub><sup>+</sup> (X = F, Cl, Br, or I) compounds.

| Parent NBO                                              | F             |               |               | Cl            |               |               | Br            |               |               | I             |               |               |
|---------------------------------------------------------|---------------|---------------|---------------|---------------|---------------|---------------|---------------|---------------|---------------|---------------|---------------|---------------|
|                                                         | $\sigma_{xx}$ | $\sigma_{yy}$ | $\sigma_{zz}$ |
| <b>CR(C1)</b>                                           | 0.00          | 0.00          | 0.00          | 0.00          | 0.00          | 0.00          | 0.00          | 0.00          | 0.00          | 0.00          | 0.00          | 0.00          |
| <b><math>\Sigma</math>CR(X)<sup>b</sup></b>             | 0.42          | 0.42          | 0.32          | -0.16         | -0.15         | -0.23         | 0.33          | 0.32          | 0.65          | 0.14          | 0.14          | 0.45          |
| $\sigma_{\text{C1-X2}}$                                 | -129.14       | -0.08         | -54.59        | -237.43       | -0.06         | -56.49        | -284.65       | -0.06         | -53.79        | -355.89       | -0.03         | -39.05        |
| $\sigma_{\text{C1-X3}}$                                 | -32.37        | -96.90        | -54.60        | -59.40        | -178.06       | -56.48        | -71.17        | -213.39       | -53.74        | -90.00        | -268.17       | -39.33        |
| $\sigma_{\text{C1-X4}}$                                 | -32.35        | -96.92        | -54.59        | -59.39        | -178.06       | -56.48        | -71.16        | -213.40       | -53.74        | -90.00        | -268.17       | -39.33        |
| $\pi_{\text{C1-X2}}$                                    | -41.40        | -3.88         | -1.27         | -69.84        | 4.61          | -0.66         | -86.55        | 6.74          | -0.27         | -108.47       | 13.68         | 0.05          |
| <b><math>\Sigma</math>LP<sub>1</sub>(X)<sup>b</sup></b> | -33.93        | -33.95        | -14.39        | -35.49        | -35.54        | -10.66        | -40.56        | -40.62        | -15.09        | -47.38        | -46.74        | -17.46        |
| <b><math>\Sigma</math>LP<sub>2</sub>(X)<sup>b</sup></b> | 22.82         | 22.82         | -32.43        | 24.77         | 24.88         | -25.70        | 22.88         | 23.03         | -22.52        | 5.14          | 5.31          | -15.13        |
| <b><math>\Sigma</math>LP<sub>3</sub>(X)<sup>b</sup></b> | -13.66        | -51.20        | -3.38         | 0.28          | -74.14        | -3.15         | 4.40          | -88.85        | -2.56         | 15.73         | -106.16       | -2.13         |
| $\sigma_{\text{C1-X2}}^*$                               | 0.00          | 0.00          | 0.00          | 0.00          | 0.00          | 0.00          | 0.00          | 0.00          | 0.00          | 0.00          | 0.00          | 0.00          |
| $\sigma_{\text{C1-X3}}^*$                               | 0.00          | 0.00          | 0.00          | 0.00          | 0.00          | 0.00          | 0.00          | 0.00          | 0.00          | 0.00          | 0.00          | 0.00          |
| $\sigma_{\text{C1-X4}}^*$                               | 0.00          | 0.00          | 0.00          | 0.00          | 0.00          | 0.00          | 0.00          | 0.00          | 0.00          | 0.00          | 0.00          | 0.00          |
| $\pi_{\text{C1-X2}}^*$                                  | 0.00          | 0.00          | 0.00          | 0.00          | 0.00          | 0.00          | 0.00          | 0.00          | 0.00          | 0.00          | 0.00          | 0.00          |
| <b><math>\Sigma</math>RY(C1)<sup>c</sup></b>            | 0.00          | 0.00          | 0.00          | 0.00          | 0.00          | 0.00          | 0.00          | 0.00          | 0.00          | 0.00          | 0.00          | 0.00          |
| <b><math>\Sigma</math>RY(X)<sup>b,c</sup></b>           | 0.00          | 0.00          | 0.00          | 0.00          | 0.00          | 0.00          | 0.00          | 0.00          | 0.00          | 0.00          | 0.00          | 0.00          |
| <b><math>\Sigma_{\text{total}}^{\text{d}}</math></b>    | -259.59       | -259.69       | -214.93       | -436.66       | -436.51       | -209.84       | -526.49       | -526.24       | -201.05       | -670.71       | -670.15       | -151.92       |

<sup>a</sup> in ppm. <sup>b</sup> Sum of halogen atom contributions. <sup>c</sup> Sum of Rydberg's contributions. <sup>d</sup> Sum of all NLMO's contributions.

### 6.2.3 Anion (CX<sub>3</sub><sup>-</sup>)

**Table S23:** NLMO's contributions<sup>a</sup> to the  $\sigma^{\text{para}}$  in terms of principal axis system ( $\sigma_{xx}$ ,  $\sigma_{yy}$ , and  $\sigma_{zz}$ ) for CX<sub>3</sub><sup>-</sup> (X = F, Cl, Br, or I) compounds.

| Parent NBO                                              | F             |               |               | Cl            |               |               | Br            |               |               | I             |               |               |
|---------------------------------------------------------|---------------|---------------|---------------|---------------|---------------|---------------|---------------|---------------|---------------|---------------|---------------|---------------|
|                                                         | $\sigma_{xx}$ | $\sigma_{yy}$ | $\sigma_{zz}$ |
| <b>CR(C1)</b>                                           | 0.00          | 0.00          | 0.00          | -0.04         | -0.04         | 0.00          | 0.00          | 0.00          | 0.00          | 0.00          | 0.00          | 0.00          |
| <b><math>\Sigma</math>CR(X)<sup>b</sup></b>             | 0.30          | 0.30          | 0.33          | -0.06         | -0.06         | -0.22         | 0.16          | 0.16          | 0.27          | 0.09          | 0.09          | 0.09          |
| $\sigma_{\text{C1-X2}}$                                 | -28.44        | -45.61        | -51.58        | -40.79        | -50.03        | -62.77        | -65.25        | -57.66        | -65.38        | -83.55        | -45.11        | -56.45        |
| $\sigma_{\text{C1-X3}}$                                 | -51.47        | -22.53        | -51.59        | -60.44        | -29.58        | -62.99        | -36.93        | -85.98        | -65.39        | -28.53        | -100.05       | -56.51        |
| $\sigma_{\text{C1-X4}}$                                 | -31.12        | -42.90        | -51.59        | -34.48        | -56.07        | -62.87        | -82.23        | -40.72        | -65.35        | -80.88        | -47.71        | -56.54        |
| <b>LP(C1)</b>                                           | -173.12       | -173.11       | 0.22          | -128.49       | -128.47       | 1.68          | -92.55        | -92.52        | 1.37          | -57.37        | -57.34        | 1.39          |
| <b><math>\Sigma</math>LP<sub>1</sub>(X)<sup>b</sup></b> | -10.78        | -10.79        | -18.07        | -19.75        | -19.75        | -16.38        | -25.01        | -25.02        | -20.87        | -33.28        | -33.26        | -24.79        |
| <b><math>\Sigma</math>LP<sub>2</sub>(X)<sup>b</sup></b> | -3.71         | -3.72         | -1.90         | -3.15         | -3.15         | -1.40         | -6.29         | -6.07         | -1.47         | -5.94         | -5.93         | -1.04         |
| <b><math>\Sigma</math>LP<sub>3</sub>(X)<sup>b</sup></b> | -2.49         | -2.48         | -19.96        | -4.65         | -4.64         | -20.54        | -3.60         | -3.86         | -20.09        | -3.30         | -3.33         | -16.76        |
| $\sigma_{\text{C1-X2}}^*$                               | 0.00          | 0.00          | 0.00          | 0.00          | 0.00          | 0.00          | 0.00          | 0.00          | 0.00          | 0.00          | 0.00          | 0.00          |
| $\sigma_{\text{C1-X3}}^*$                               | 0.00          | 0.00          | 0.00          | 0.00          | 0.00          | 0.00          | 0.00          | 0.00          | 0.00          | 0.00          | 0.00          | 0.00          |
| $\sigma_{\text{C1-X4}}^*$                               | 0.00          | 0.00          | 0.00          | 0.00          | 0.00          | 0.00          | 0.00          | 0.00          | 0.00          | 0.00          | 0.00          | 0.00          |
| <b><math>\Sigma</math>RY(C1)<sup>c</sup></b>            | 0.00          | 0.00          | 0.00          | 0.00          | 0.00          | 0.00          | 0.00          | 0.00          | 0.00          | 0.00          | 0.00          | 0.00          |
| <b><math>\Sigma</math>RY(X)<sup>b,c</sup></b>           | 0.00          | 0.00          | 0.00          | 0.00          | 0.00          | 0.00          | 0.00          | 0.00          | 0.00          | 0.00          | 0.00          | 0.00          |
| <b><math>\Sigma_{\text{total}}^{\text{d}}</math></b>    | -300.83       | -300.83       | -194.13       | -291.83       | -291.80       | -225.48       | -311.70       | -311.66       | -236.91       | -292.76       | -292.65       | -210.60       |

<sup>a</sup> in ppm. <sup>b</sup> Sum of halogen atom contributions. <sup>c</sup> Sum of Rydberg's contributions. <sup>d</sup> Sum of all NLMO's contributions.

## 6.3 NLMO's contributions to the $\sigma^{\text{SO}}$

### 6.3.1 Neutral ( $\text{CHX}_3$ )

**Table S24:** NLMO's contributions<sup>a</sup> to the  $\sigma^{\text{SO}}$  in terms of principal axis system ( $\sigma_{xx}$ ,  $\sigma_{yy}$ , and  $\sigma_{zz}$ ) for  $\text{CHX}_3$  (X = F, Cl, Br, or I) compounds.

| Parent NBO                                                  | F             |               |               | Cl            |               |               | Br            |               |               | I             |               |               |
|-------------------------------------------------------------|---------------|---------------|---------------|---------------|---------------|---------------|---------------|---------------|---------------|---------------|---------------|---------------|
|                                                             | $\sigma_{xx}$ | $\sigma_{yy}$ | $\sigma_{zz}$ |
| <b>CR(Cl)</b>                                               | 0.65          | 0.65          | 0.64          | 0.43          | 0.43          | 0.94          | -0.60         | -0.60         | 2.29          | -3.85         | -3.85         | 8.48          |
| <b><math>\Sigma\text{CR(X)}</math><sup>b</sup></b>          | 0.00          | 0.00          | 0.00          | 0.00          | 0.00          | 0.00          | 0.00          | 0.00          | -0.01         | 0.02          | 0.03          | 0.04          |
| $\sigma_{\text{C1-X2}}$                                     | 0.29          | 0.01          | 0.45          | 2.79          | 0.80          | 4.66          | 15.37         | 5.28          | 29.12         | 51.31         | 3.03          | 94.34         |
| $\sigma_{\text{C1-X3}}$                                     | 0.09          | 0.21          | 0.45          | 2.68          | 0.90          | 4.66          | -2.08         | 22.68         | 28.92         | -15.24        | 69.62         | 94.28         |
| $\sigma_{\text{C1-X4}}$                                     | 0.07          | 0.23          | 0.45          | -0.08         | 3.67          | 4.62          | 17.59         | 2.93          | 28.90         | 45.17         | 8.67          | 93.43         |
| $\sigma_{\text{C1-H5}}$                                     | 0.48          | 0.48          | 0.20          | -0.02         | -0.02         | -2.58         | -2.66         | -2.65         | -19.21        | -13.23        | -13.29        | -67.05        |
| <b><math>\Sigma\text{LP}_1(\text{X})</math><sup>b</sup></b> | 0.13          | 0.13          | 0.18          | 0.58          | 0.58          | 0.90          | 2.94          | 2.95          | 4.11          | 8.51          | 8.52          | 6.83          |
| <b><math>\Sigma\text{LP}_2(\text{X})</math><sup>b</sup></b> | -0.02         | -0.02         | 0.08          | -0.03         | -0.03         | 0.71          | -0.53         | -0.55         | 4.28          | -4.82         | -4.75         | 16.25         |
| <b><math>\Sigma\text{LP}_3(\text{X})</math><sup>b</sup></b> | -0.01         | -0.01         | -0.04         | 0.03          | 0.03          | -0.05         | 0.18          | 0.17          | -0.14         | 0.41          | 0.33          | 0.09          |
| $\sigma_{\text{C1-X2}}^*$                                   | 0.15          | 0.01          | 0.14          | 3.23          | 1.31          | 5.81          | 10.31         | 10.23         | 35.71         | 28.58         | -3.58         | 111.76        |
| $\sigma_{\text{C1-X3}}^*$                                   | 0.07          | 0.10          | 0.14          | 2.93          | 1.45          | 5.59          | 1.85          | 17.99         | 34.44         | -13.88        | 38.50         | 110.04        |
| $\sigma_{\text{C1-X4}}^*$                                   | 0.03          | 0.14          | 0.14          | 0.41          | 3.81          | 5.39          | 17.61         | 1.55          | 33.19         | 21.91         | 1.70          | 105.59        |
| $\sigma_{\text{C1-H5}}^*$                                   | 0.03          | 0.03          | -0.02         | 0.05          | 0.05          | -0.16         | 0.41          | 0.41          | -0.19         | 0.77          | 0.77          | -0.37         |
| <b><math>\Sigma\text{RY}(\text{Cl})</math><sup>c</sup></b>  | -0.1          | -0.1          | 0.06          | 1.34          | 1.33          | 2.39          | 2.95          | 2.95          | 0.00          | 0.67          | 0.67          | -52.43        |
| <b><math>\Sigma\text{RY}(\text{X})</math><sup>b,c</sup></b> | 0.33          | 0.34          | 0.39          | -3.66         | -3.67         | -7.87         | -11.31        | -11.31        | -27.50        | -8.63         | -8.63         | -16.34        |
| <b><math>\Sigma\text{RY}(\text{H})</math><sup>c</sup></b>   | -0.01         | -0.01         | -0.02         | 0.10          | 0.10          | -0.08         | -0.96         | -0.95         | -4.37         | -0.99         | -0.98         | -11.83        |
| <b><math>\Sigma_{\text{total}}</math><sup>d</sup></b>       | 2.19          | 2.19          | 3.25          | 10.77         | 10.76         | 24.94         | 51.09         | 51.08         | 149.55        | 96.73         | 96.76         | 493.12        |

<sup>a</sup> in ppm. <sup>b</sup> Sum of halogen atom contributions. <sup>c</sup> Sum of Rydberg's contributions. <sup>d</sup> Sum of all NLMO's contributions.

### 6.3.2 Cation (CX<sub>3</sub><sup>+</sup>)

**Table S25:** NLMO's contributions<sup>a</sup> to the  $\sigma^{\text{SO}}$  in terms of principal axis system ( $\sigma_{\text{xx}}$ ,  $\sigma_{\text{yy}}$ , and  $\sigma_{\text{zz}}$ ) for CX<sub>3</sub><sup>+</sup> (X = F, Cl, Br, or I) compounds.

| Parent NBO                                              | F                    |                      |                      | Cl                   |                      |                      | Br                   |                      |                      | I                    |                      |                      |
|---------------------------------------------------------|----------------------|----------------------|----------------------|----------------------|----------------------|----------------------|----------------------|----------------------|----------------------|----------------------|----------------------|----------------------|
|                                                         | $\sigma_{\text{xx}}$ | $\sigma_{\text{yy}}$ | $\sigma_{\text{zz}}$ |
| <b>CR(C1)</b>                                           | 0.31                 | 0.31                 | 0.77                 | -1.38                | -1.38                | 1.58                 | -10.32               | -10.33               | 6.94                 | -26.55               | -26.68               | 24.78                |
| <b><math>\Sigma</math>CR(X)<sup>b</sup></b>             | 0.00                 | 0.00                 | 0.00                 | 0.00                 | 0.00                 | 0.00                 | 0.00                 | -0.01                | 0.00                 | 0.03                 | 0.02                 | 0.04                 |
| $\sigma_{\text{C1-X2}}$                                 | 0.71                 | 0.39                 | 0.56                 | 5.99                 | 2.72                 | 4.58                 | 36.16                | 14.39                | 27.05                | 101.67               | 32.37                | 77.15                |
| $\sigma_{\text{C1-X3}}$                                 | 0.47                 | 0.63                 | 0.56                 | 3.54                 | 5.17                 | 4.58                 | 19.83                | 30.75                | 27.03                | 49.11                | 83.87                | 75.99                |
| $\sigma_{\text{C1-X4}}$                                 | 0.47                 | 0.63                 | 0.56                 | 3.54                 | 5.18                 | 4.57                 | 19.84                | 30.74                | 27.03                | 49.05                | 83.93                | 75.99                |
| $\pi_{\text{C1-X2}}$                                    | -0.09                | -0.06                | 0.02                 | -0.47                | -0.62                | 0.30                 | -2.32                | -3.58                | 1.84                 | -4.99                | -9.60                | 6.15                 |
| <b><math>\Sigma</math>LP<sub>1</sub>(X)<sup>b</sup></b> | 0.34                 | 0.35                 | 0.36                 | 1.34                 | 1.34                 | 1.27                 | 6.95                 | 6.94                 | 6.13                 | 16.77                | 16.74                | 14.54                |
| <b><math>\Sigma</math>LP<sub>2</sub>(X)<sup>b</sup></b> | -0.09                | -0.09                | 0.04                 | -0.37                | -0.37                | 0.28                 | -1.53                | -1.51                | 1.19                 | -1.50                | -1.40                | 1.05                 |
| <b><math>\Sigma</math>LP<sub>3</sub>(X)<sup>b</sup></b> | -0.09                | -0.13                | 0.02                 | -0.68                | -0.53                | 0.34                 | -3.74                | -2.48                | 2.03                 | -9.22                | -4.66                | 6.25                 |
| $\sigma_{\text{C1-X2}}^*$                               | 0.00                 | 0.01                 | 0.02                 | 3.14                 | 0.51                 | 6.45                 | 19.02                | 1.93                 | 46.09                | 42.54                | -10.67               | 161.91               |
| $\sigma_{\text{C1-X3}}^*$                               | 0.01                 | 0.00                 | 0.02                 | 1.16                 | 2.48                 | 6.45                 | 6.20                 | 14.75                | 46.07                | 1.72                 | 28.36                | 153.06               |
| $\sigma_{\text{C1-X4}}^*$                               | 0.01                 | 0.00                 | 0.02                 | 1.16                 | 2.48                 | 6.45                 | 6.20                 | 14.75                | 46.07                | 1.73                 | 28.35                | 153.06               |
| $\pi_{\text{C1-X2}}^*$                                  | -0.13                | -0.13                | -0.03                | -0.83                | -0.83                | 0.09                 | -4.34                | -4.35                | 0.24                 | -10.49               | -10.52               | -0.30                |
| <b><math>\Sigma</math>RY(C1)<sup>c</sup></b>            | 0.39                 | 0.39                 | 1.64                 | 1.05                 | 1.05                 | 4.13                 | 8.16                 | 8.17                 | 34.54                | 16.00                | 16.02                | 115.54               |
| <b><math>\Sigma</math>RY(X)<sup>b,c</sup></b>           | -0.14                | -0.14                | -0.62                | -2.54                | -2.53                | -9.82                | -18.31               | -18.31               | -82.94               | -31.06               | -31.09               | -280.72              |
| <b><math>\Sigma_{\text{total}}^{\text{d}}</math></b>    | 2.17                 | 2.17                 | 3.93                 | 14.65                | 14.66                | 31.25                | 81.81                | 81.85                | 189.31               | 194.80               | 195.06               | 584.50               |

<sup>a</sup> in ppm. <sup>b</sup> Sum of halogen atom contributions. <sup>c</sup> Sum of Rydberg's contributions. <sup>d</sup> Sum of all NLMO's contributions.

### 6.3.3 Anion (CX<sub>3</sub><sup>-</sup>)

**Table S26:** NLMO's contributions<sup>a</sup> to the  $\sigma^{SO}$  in terms of principal axis system ( $\sigma_{xx}$ ,  $\sigma_{yy}$ , and  $\sigma_{zz}$ ) for CX<sub>3</sub><sup>-</sup> (X = F, Cl, Br, or I) compounds.

| Parent NBO                                              | F             |               |               | Cl            |               |               | Br            |               |               | I             |               |               |
|---------------------------------------------------------|---------------|---------------|---------------|---------------|---------------|---------------|---------------|---------------|---------------|---------------|---------------|---------------|
|                                                         | $\sigma_{xx}$ | $\sigma_{yy}$ | $\sigma_{zz}$ |
| <b>CR(C1)</b>                                           | 0.65          | 0.65          | 0.62          | -0.24         | -0.24         | -0.74         | -4.36         | -4.36         | -12.29        | -18.33        | -18.32        | -67.41        |
| <b><math>\Sigma</math>CR(X)<sup>b</sup></b>             | 0.00          | 0.00          | 0.00          | 0.00          | 0.00          | 0.00          | 0.00          | 0.00          | 0.00          | 0.02          | 0.02          | 0.04          |
| $\sigma_{C1-X2}$                                        | 1.73          | -1.37         | 0.34          | 0.56          | 2.23          | 3.82          | 9.27          | 4.13          | 23.56         | 44.17         | -6.88         | 97.87         |
| $\sigma_{C1-X3}$                                        | 0.69          | -0.33         | 0.34          | 2.55          | 0.23          | 3.80          | 0.70          | 12.69         | 23.63         | -4.29         | 41.50         | 98.32         |
| $\sigma_{C1-X4}$                                        | -1.88         | 2.24          | 0.34          | 1.07          | 1.71          | 3.82          | 10.15         | 3.29          | 23.60         | 16.05         | 21.24         | 97.58         |
| <b>LP(C1)</b>                                           | 0.51          | 0.51          | 0.76          | -3.61         | -3.61         | -13.59        | -27.65        | -27.64        | -114.64       | -122.79       | -122.75       | -578.33       |
| <b><math>\Sigma</math>LP<sub>1</sub>(X)<sup>b</sup></b> | 0.16          | 0.17          | 0.19          | 0.68          | 0.68          | 0.81          | 2.66          | 2.67          | 4.68          | 6.38          | 6.38          | 19.02         |
| <b><math>\Sigma</math>LP<sub>2</sub>(X)<sup>b</sup></b> | -0.03         | -0.03         | 0.13          | -0.50         | -0.50         | 0.86          | -0.68         | -0.83         | 2.91          | -4.00         | -4.02         | -3.77         |
| <b><math>\Sigma</math>LP<sub>3</sub>(X)<sup>b</sup></b> | -0.01         | -0.01         | -0.04         | 0.03          | 0.03          | -0.07         | 0.05          | 0.20          | -0.29         | 0.19          | 0.21          | -0.30         |
| $\sigma_{C1-X2}^*$                                      | 0.04          | 0.20          | 0.24          | 1.43          | 2.07          | 3.37          | 4.80          | 4.51          | 14.51         | 1.38          | 5.63          | 32.87         |
| $\sigma_{C1-X3}^*$                                      | 0.23          | 0.01          | 0.24          | 2.88          | 0.47          | 3.20          | 1.01          | 8.01          | 13.98         | -1.00         | 7.48          | 30.28         |
| $\sigma_{C1-X4}^*$                                      | 0.09          | 0.15          | 0.24          | 0.83          | 2.60          | 3.29          | 8.16          | 1.45          | 15.08         | 9.73          | -2.99         | 31.58         |
| <b><math>\Sigma</math>RY(C1)<sup>c</sup></b>            | 0.39          | 0.39          | 0.51          | 2.86          | 2.86          | 4.57          | 7.92          | 7.93          | 21.40         | 15.97         | 15.97         | 87.06         |
| <b><math>\Sigma</math>RY(X)<sup>b,c</sup></b>           | -0.32         | -0.33         | -0.36         | -4.57         | -4.56         | -7.65         | -11.31        | -11.32        | -30.81        | -14.48        | -14.48        | -84.69        |
| <b><math>\Sigma_{total}^d</math></b>                    | 2.26          | 2.26          | 3.54          | 3.95          | 3.95          | 5.49          | 0.73          | 0.73          | -14.68        | -71.00        | -71.03        | -239.88       |

<sup>a</sup> in ppm. <sup>b</sup> Sum of halogen atom contributions. <sup>c</sup> Sum of Rydberg's contributions. <sup>d</sup> Sum of all NLMO's contributions.



## 6.4 NLMO's contributions to the $\sigma$

### 6.4.1 Neutral (CHX<sub>3</sub>)

**Table S27:** NLMO's contributions<sup>a</sup> to the  $\sigma$  in terms of principal axis system ( $\sigma_{xx}$ ,  $\sigma_{yy}$ , and  $\sigma_{zz}$ ) for CHX<sub>3</sub> (X = F, Cl, Br, or I) compounds.

| Parent NBO                                              | F             |               |               | Cl            |               |               | Br            |               |               | I             |               |               |
|---------------------------------------------------------|---------------|---------------|---------------|---------------|---------------|---------------|---------------|---------------|---------------|---------------|---------------|---------------|
|                                                         | $\sigma_{xx}$ | $\sigma_{yy}$ | $\sigma_{zz}$ |
| <b>CR(Cl)</b>                                           | 201.22        | 201.22        | 201.22        | 201.00        | 200.99        | 201.51        | 199.96        | 199.96        | 202.86        | 196.72        | 196.72        | 209.05        |
| <b><math>\Sigma</math>CR(X)<sup>b</sup></b>             | 0.46          | 0.46          | 0.50          | 0.40          | 0.40          | -1.09         | 1.75          | 1.75          | -2.67         | 3.17          | 3.18          | -4.74         |
| $\sigma_{C1-X2}$                                        | -43.54        | 0.17          | -47.22        | -15.30        | -2.61         | -45.56        | -0.44         | -0.46         | -20.39        | 48.27         | 1.95          | 57.99         |
| $\sigma_{C1-X3}$                                        | -16.61        | -26.75        | -47.23        | -14.10        | -3.82         | -45.59        | 0.36          | -1.25         | -20.70        | -12.86        | 63.15         | 58.00         |
| $\sigma_{C1-X4}$                                        | -4.90         | -38.47        | -47.24        | 2.56          | -20.41        | -45.73        | -1.29         | 0.36          | -20.81        | 39.77         | 10.18         | 56.90         |
| $\sigma_{C1-H5}$                                        | -76.67        | -76.67        | 15.81         | -72.11        | -72.01        | 13.25         | -63.90        | -63.91        | -3.32         | -63.71        | -63.73        | -51.31        |
| <b><math>\Sigma</math>L<sub>P1</sub>(X)<sup>b</sup></b> | -3.04         | -3.04         | -14.32        | -3.17         | -3.18         | -9.77         | -3.58         | -3.58         | -10.92        | -1.45         | -1.44         | -12.27        |
| <b><math>\Sigma</math>L<sub>P2</sub>(X)<sup>b</sup></b> | 4.04          | 4.04          | -0.68         | 1.13          | 1.16          | -0.13         | 1.60          | 1.60          | 3.84          | -0.22         | -0.20         | 16.68         |
| <b><math>\Sigma</math>L<sub>P3</sub>(X)<sup>b</sup></b> | 5.18          | 5.18          | -14.79        | 4.22          | 4.21          | -15.36        | 2.89          | 2.89          | -15.89        | 2.06          | 2.01          | -12.17        |
| $\sigma_{C1-X2}^*$                                      | 0.15          | 0.01          | 0.14          | 3.23          | 1.31          | 5.81          | 10.32         | 10.24         | 35.71         | 28.62         | -3.52         | 111.78        |
| $\sigma_{C1-X3}^*$                                      | 0.07          | 0.10          | 0.14          | 2.93          | 1.45          | 5.59          | 1.85          | 18.00         | 34.44         | -13.82        | 38.53         | 110.06        |
| $\sigma_{C1-X4}^*$                                      | 0.03          | 0.14          | 0.14          | 0.42          | 3.81          | 5.39          | 17.61         | 1.56          | 33.19         | 21.95         | 1.76          | 105.61        |
| $\sigma_{C1-H5}^*$                                      | 0.03          | 0.03          | -0.02         | 0.05          | 0.05          | -0.16         | 0.41          | 0.41          | -0.19         | 0.76          | 0.76          | -0.37         |
| <b><math>\Sigma</math>RY(Cl)<sup>c</sup></b>            | -0.10         | -0.10         | 0.06          | 1.34          | 1.33          | 2.39          | 2.93          | 2.93          | -0.04         | 0.55          | 0.55          | -52.74        |
| <b><math>\Sigma</math>RY(X)<sup>b,c</sup></b>           | 0.33          | 0.34          | 0.39          | -3.65         | -3.65         | -7.87         | -11.31        | -11.30        | -27.46        | -8.53         | -8.52         | -16.08        |
| <b><math>\Sigma</math>RY(H)<sup>c</sup></b>             | -0.01         | -0.01         | -0.02         | 0.09          | 0.09          | -0.08         | -0.97         | -0.97         | -4.37         | -1.07         | -1.06         | -11.83        |
| <b><math>\Sigma_{total}^d</math></b>                    | 66.65         | 66.65         | 46.89         | 109.03        | 109.13        | 62.61         | 158.22        | 158.25        | 183.26        | 240.23        | 240.31        | 564.57        |

<sup>a</sup> in ppm. <sup>b</sup> Sum of halogen atom contributions. <sup>c</sup> Sum of Rydberg's contributions. <sup>d</sup> Sum of all NLMO's contributions.

## 6.4.2 Cation (CX<sub>3</sub><sup>+</sup>)

**Table S28:** NLMO's contributions<sup>a</sup> to the  $\sigma$  in terms of principal axis system ( $\sigma_{xx}$ ,  $\sigma_{yy}$ , and  $\sigma_{zz}$ ) for CX<sub>3</sub><sup>+</sup> (X = F, Cl, Br, or I) compounds.

| Parent NBO                                              | F             |               |               | Cl            |               |               | Br            |               |               | I             |               |               |
|---------------------------------------------------------|---------------|---------------|---------------|---------------|---------------|---------------|---------------|---------------|---------------|---------------|---------------|---------------|
|                                                         | $\sigma_{xx}$ | $\sigma_{yy}$ | $\sigma_{zz}$ |
| <b>CR(C1)</b>                                           | 200.91        | 200.91        | 201.38        | 199.21        | 199.21        | 202.18        | 190.27        | 190.26        | 207.54        | 174.03        | 173.91        | 225.37        |
| <b><math>\Sigma</math>CR(X)<sup>b</sup></b>             | 0.63          | 0.62          | 0.38          | 0.64          | 0.64          | -1.68         | 2.81          | 2.82          | -4.46         | 4.73          | 4.72          | -6.95         |
| $\sigma_{C1-X2}$                                        | -120.80       | 12.25         | -46.79        | -216.61       | 16.78         | -36.84        | -234.44       | 28.84         | -12.36        | -241.73       | 47.39         | 51.11         |
| $\sigma_{C1-X3}$                                        | -21.04        | -87.56        | -46.80        | -41.56        | -158.23       | -36.83        | -36.95        | -168.47       | -12.32        | -26.55        | -171.26       | 49.58         |
| $\sigma_{C1-X4}$                                        | -21.02        | -87.58        | -46.79        | -41.56        | -158.23       | -36.83        | -36.93        | -168.49       | -12.32        | -26.60        | -171.20       | 49.58         |
| $\pi_{C1-X2}$                                           | -31.59        | 3.71          | 2.27          | -59.29        | 13.34         | 3.58          | -78.13        | 12.69         | 5.31          | -102.77       | 13.96         | 9.93          |
| <b><math>\Sigma</math>LP<sub>1</sub>(X)<sup>b</sup></b> | -26.70        | -26.72        | -6.63         | -28.57        | -28.61        | -4.93         | -28.94        | -29.00        | -6.19         | -26.15        | -25.54        | -0.51         |
| <b><math>\Sigma</math>LP<sub>2</sub>(X)<sup>b</sup></b> | 32.60         | 32.61         | -14.31        | 30.66         | 30.75         | -16.62        | 26.62         | 26.77         | -14.95        | 7.71          | 7.97          | -11.10        |
| <b><math>\Sigma</math>LP<sub>3</sub>(X)<sup>b</sup></b> | -1.01         | -36.33        | 1.44          | 12.42         | -60.17        | 1.46          | 12.89         | -77.90        | 3.14          | 17.91         | -98.62        | 7.22          |
| $\sigma_{C1-X2}^*$                                      | 0.00          | 0.01          | 0.02          | 3.14          | 0.51          | 6.45          | 19.02         | 1.94          | 46.08         | 42.54         | -10.62        | 161.86        |
| $\sigma_{C1-X3}^*$                                      | 0.01          | 0.00          | 0.02          | 1.17          | 2.48          | 6.45          | 6.21          | 14.75         | 46.06         | 1.76          | 28.37         | 153.02        |
| $\sigma_{C1-X4}^*$                                      | 0.01          | 0.00          | 0.02          | 1.17          | 2.48          | 6.45          | 6.21          | 14.75         | 46.06         | 1.77          | 28.36         | 153.02        |
| $\pi_{C1-X2}^*$                                         | -0.13         | -0.13         | -0.03         | -0.83         | -0.83         | 0.10          | -4.31         | -4.32         | 0.26          | -10.32        | -10.35        | -0.22         |
| <b><math>\Sigma</math>RY(C1)<sup>c</sup></b>            | 0.39          | 0.39          | 1.64          | 1.05          | 1.05          | 4.13          | 8.14          | 8.14          | 34.49         | 15.98         | 15.99         | 115.41        |
| <b><math>\Sigma</math>RY(X)<sup>b,c</sup></b>           | -0.14         | -0.14         | -0.62         | -2.54         | -2.53         | -9.82         | -18.31        | -18.29        | -82.91        | -31.02        | -31.05        | -280.54       |
| <b><math>\Sigma_{total}^d</math></b>                    | 12.12         | 12.04         | 45.21         | -141.51       | -141.37       | 87.26         | -165.82       | -165.52       | 243.43        | -198.73       | -197.95       | 676.79        |

<sup>a</sup> in ppm. <sup>b</sup> Sum of halogen atom contributions. <sup>c</sup> Sum of Rydberg's contributions. <sup>d</sup> Sum of all NLMO's contributions.

### 6.4.3 Anion (CX<sub>3</sub><sup>-</sup>)

**Table S29:** NLMO's contributions<sup>a</sup> to the  $\sigma$  in terms of principal axis system ( $\sigma_{xx}$ ,  $\sigma_{yy}$ , and  $\sigma_{zz}$ ) for CX<sub>3</sub><sup>-</sup> (X = F, Cl, Br, or I) compounds.

| Parent NBO                                              | F             |               |               | Cl            |               |               | Br            |               |               | I             |               |               |
|---------------------------------------------------------|---------------|---------------|---------------|---------------|---------------|---------------|---------------|---------------|---------------|---------------|---------------|---------------|
|                                                         | $\sigma_{xx}$ | $\sigma_{yy}$ | $\sigma_{zz}$ |
| <b>CR(C1)</b>                                           | 201.09        | 201.09        | 201.07        | 200.12        | 200.12        | 199.66        | 196.01        | 196.01        | 188.08        | 182.05        | 182.06        | 132.98        |
| <b><math>\Sigma</math>CR(X)<sup>b</sup></b>             | 0.41          | 0.41          | 0.41          | 0.22          | 0.22          | -0.60         | 0.98          | 0.98          | -1.41         | 1.92          | 1.91          | -2.82         |
| $\sigma_{C1-X2}$                                        | -20.44        | -42.26        | -46.07        | -33.66        | -42.04        | -53.73        | -52.40        | -49.61        | -39.22        | -34.06        | -48.77        | 43.65         |
| $\sigma_{C1-X3}$                                        | -46.37        | -16.29        | -46.09        | -53.26        | -21.66        | -53.98        | -29.94        | -72.08        | -39.17        | -26.40        | -56.45        | 44.01         |
| $\sigma_{C1-X4}$                                        | -27.21        | -35.47        | -46.09        | -26.11        | -49.32        | -53.82        | -70.70        | -31.31        | -39.15        | -63.78        | -19.01        | 43.22         |
| <b>LP(C1)</b>                                           | -140.33       | -140.32       | 24.99         | -110.43       | -110.41       | 13.59         | -96.11        | -96.07        | -86.14        | -154.12       | -154.05       | -549.18       |
| <b><math>\Sigma</math>LP<sub>1</sub>(X)<sup>b</sup></b> | -5.21         | -5.21         | -12.40        | -14.05        | -14.06        | -12.62        | -18.06        | -18.06        | -14.24        | -22.61        | -22.58        | -4.26         |
| <b><math>\Sigma</math>LP<sub>2</sub>(X)<sup>b</sup></b> | 2.35          | 2.34          | 0.40          | 1.69          | 1.68          | 1.68          | -1.60         | -1.57         | 3.62          | -5.34         | -5.34         | -3.03         |
| <b><math>\Sigma</math>LP<sub>3</sub>(X)<sup>b</sup></b> | 2.99          | 3.00          | -12.39        | -0.16         | -0.15         | -14.10        | 0.60          | 0.54          | -14.19        | 0.36          | 0.35          | -12.70        |
| $\sigma_{C1-X2}^*$                                      | 0.04          | 0.20          | 0.24          | 1.43          | 2.07          | 3.37          | 4.80          | 4.52          | 14.52         | 1.43          | 5.68          | 32.92         |
| $\sigma_{C1-X3}^*$                                      | 0.23          | 0.01          | 0.24          | 2.88          | 0.47          | 3.20          | 1.01          | 8.02          | 13.98         | -0.94         | 7.53          | 30.33         |
| $\sigma_{C1-X4}^*$                                      | 0.09          | 0.15          | 0.24          | 0.83          | 2.60          | 3.29          | 8.16          | 1.45          | 15.08         | 9.79          | -2.94         | 31.62         |
| <b><math>\Sigma</math>RY(C1)<sup>c</sup></b>            | 0.39          | 0.39          | 0.51          | 2.86          | 2.86          | 4.57          | 7.92          | 7.93          | 21.37         | 16.03         | 16.04         | 86.92         |
| <b><math>\Sigma</math>RY(X)<sup>b,c</sup></b>           | -0.32         | -0.33         | -0.36         | -4.57         | -4.56         | -7.65         | -11.30        | -11.31        | -30.80        | -14.48        | -14.48        | -84.57        |
| <b><math>\Sigma_{total}^d</math></b>                    | -32.30        | -32.29        | 64.69         | -32.23        | -32.19        | 32.86         | -60.65        | -60.58        | -7.66         | -110.15       | -110.04       | -210.93       |

<sup>a</sup> in ppm. <sup>b</sup> Sum of halogen atom contributions. <sup>c</sup> Sum of Rydberg's contributions. <sup>d</sup> Sum of all NLMO's contributions.

## 7 MO's contributions to the $\sigma^{13}\text{C}$ NMR

MO's contributions to paramagnetic and spin-orbit terms of the  $\sigma^{13}\text{C}$  NMR are displayed in Tables S30-S35. Each contribution is decomposed into values from couplings between pairs of occupied MOs (occ-occ) and between occupied and vacant MOs (occ-vac).

### 7.1 Neutral ( $\text{CHX}_3$ )

**Table S30:** MO's contributions<sup>a</sup> to the  $\sigma^{\text{para}}$  in terms of principal axis system ( $\sigma_{xx}$ ,  $\sigma_{yy}$ , and  $\sigma_{zz}$ ) for  $\text{CHX}_3$  (X = F, Cl, Br, or I) compounds.

| Contribution  | F       |         |         | Cl      |         |         | Br      |         |         | I       |         |         |
|---------------|---------|---------|---------|---------|---------|---------|---------|---------|---------|---------|---------|---------|
|               | occ-vac | occ-occ | total   |
| $\sigma_{xx}$ | -205.38 | -6.06   | -211.44 | -222.19 | 63.64   | -158.55 | -225.75 | 74.30   | -151.46 | -252.66 | 160.25  | -92.41  |
| $\sigma_{yy}$ | -205.37 | -6.06   | -211.43 | -222.18 | 63.72   | -158.46 | -225.75 | 74.31   | -151.44 | -252.74 | 160.37  | -92.37  |
| $\sigma_{zz}$ | -207.81 | -0.40   | -208.21 | -243.88 | 21.95   | -221.93 | -263.61 | 44.66   | -218.95 | -267.59 | 101.53  | -166.05 |
| $\sigma$      | -206.19 | -4.17   | -210.36 | -229.42 | 49.77   | -179.65 | -238.37 | 64.42   | -173.95 | -257.66 | 140.72  | -116.95 |

<sup>a</sup> in ppm.

**Table S31:** MO's contributions<sup>a</sup> to the  $\sigma^{\text{SO}}$  in terms of principal axis system ( $\sigma_{xx}$ ,  $\sigma_{yy}$ , and  $\sigma_{zz}$ ) for  $\text{CHX}_3$  (X = F, Cl, Br, or I) compounds.

| Contribution  | F       |         |       | Cl      |         |       | Br      |         |        | I       |         |        |
|---------------|---------|---------|-------|---------|---------|-------|---------|---------|--------|---------|---------|--------|
|               | occ-vac | occ-occ | total | occ-vac | occ-occ | total | occ-vac | occ-occ | total  | occ-vac | occ-occ | total  |
| $\sigma_{xx}$ | 1.37    | 0.82    | 2.19  | 7.61    | 3.16    | 10.77 | 38.09   | 13.01   | 51.12  | 65.17   | 31.54   | 96.71  |
| $\sigma_{yy}$ | 1.37    | 0.81    | 2.18  | 7.60    | 3.17    | 10.77 | 38.08   | 13.01   | 51.09  | 65.23   | 31.54   | 96.77  |
| $\sigma_{zz}$ | 2.43    | 0.82    | 3.25  | 21.21   | 3.73    | 24.94 | 128.01  | 21.54   | 149.55 | 429.75  | 63.37   | 493.12 |
| $\sigma$      | 1.72    | 0.82    | 2.54  | 12.14   | 3.35    | 15.49 | 68.06   | 15.85   | 83.92  | 186.72  | 42.15   | 228.87 |

<sup>a</sup> in ppm.

## 7.2 Cation (CX<sub>3</sub><sup>+</sup>)

**Table S32:** MO's contributions<sup>a</sup> to the  $\sigma^{\text{para}}$  in terms of principal axis system ( $\sigma_{xx}$ ,  $\sigma_{yy}$ , and  $\sigma_{zz}$ ) for CX<sub>3</sub><sup>+</sup> (X = F, Cl, Br, or I) compounds.

| Contribution  | F       |         |         | Cl      |         |         | Br      |         |         | I       |         |         |
|---------------|---------|---------|---------|---------|---------|---------|---------|---------|---------|---------|---------|---------|
|               | occ-vac | occ-occ | total   |
| $\sigma_{xx}$ | -233.26 | -26.33  | -259.59 | -424.81 | -11.85  | -436.66 | -515.89 | -10.60  | -526.49 | -671.69 | 0.98    | -670.71 |
| $\sigma_{yy}$ | -233.32 | -26.37  | -259.68 | -424.66 | -11.85  | -436.51 | -515.62 | -10.62  | -526.24 | -671.34 | 1.20    | -670.15 |
| $\sigma_{zz}$ | -198.70 | -16.23  | -214.93 | -221.65 | 11.81   | -209.84 | -239.50 | 38.45   | -201.05 | -227.46 | 75.55   | -151.92 |
| $\sigma$      | -221.76 | -22.98  | -244.73 | -357.04 | -3.96   | -361.00 | -423.67 | 5.74    | -417.93 | -523.50 | 25.91   | -497.59 |

<sup>a</sup> in ppm.

**Table S33:** MO's contributions<sup>a</sup> to the  $\sigma^{\text{SO}}$  in terms of principal axis system ( $\sigma_{xx}$ ,  $\sigma_{yy}$ , and  $\sigma_{zz}$ ) for CX<sub>3</sub><sup>+</sup> (X = F, Cl, Br, or I) compounds.

| Contribution  | F       |         |       | Cl      |         |       | Br      |         |        | I       |         |        |
|---------------|---------|---------|-------|---------|---------|-------|---------|---------|--------|---------|---------|--------|
|               | occ-vac | occ-occ | total | occ-vac | occ-occ | total | occ-vac | occ-occ | total  | occ-vac | occ-occ | total  |
| $\sigma_{xx}$ | 1.94    | 0.23    | 2.17  | 12.27   | 2.38    | 14.65 | 69.31   | 12.50   | 81.81  | 157.44  | 37.36   | 194.80 |
| $\sigma_{yy}$ | 1.95    | 0.22    | 2.16  | 12.28   | 2.38    | 14.66 | 69.35   | 12.50   | 81.85  | 157.66  | 37.41   | 195.07 |
| $\sigma_{zz}$ | 3.36    | 0.57    | 3.94  | 26.02   | 5.24    | 31.26 | 157.80  | 31.51   | 189.31 | 497.35  | 87.15   | 584.50 |
| $\sigma$      | 2.42    | 0.34    | 2.76  | 16.86   | 3.33    | 20.19 | 98.82   | 18.84   | 117.66 | 270.82  | 53.98   | 324.79 |

<sup>a</sup> in ppm.

### 7.3 Anion (CX<sub>3</sub><sup>-</sup>)

**Table S34:** MO's contributions<sup>a</sup> to the  $\sigma^{\text{para}}$  in terms of principal axis system ( $\sigma_{xx}$ ,  $\sigma_{yy}$ , and  $\sigma_{zz}$ ) for CX<sub>3</sub><sup>-</sup> (X = F, Cl, Br, or I) compounds.

| Contribution  | F       |         |         | Cl      |         |         | Br      |         |         | I       |         |         |
|---------------|---------|---------|---------|---------|---------|---------|---------|---------|---------|---------|---------|---------|
|               | occ-vac | occ-occ | total   |
| $\sigma_{xx}$ | -311.51 | 10.67   | -300.84 | -375.40 | 83.59   | -291.81 | -396.43 | 84.74   | -311.69 | -390.03 | 97.28   | -292.75 |
| $\sigma_{yy}$ | -311.51 | 10.68   | -300.83 | -375.39 | 83.57   | -291.82 | -396.43 | 84.76   | -311.68 | -390.05 | 97.39   | -292.66 |
| $\sigma_{zz}$ | -193.37 | -0.75   | -194.12 | -255.04 | 29.56   | -225.48 | -295.03 | 58.13   | -236.91 | -297.61 | 87.01   | -210.60 |
| $\sigma$      | -272.13 | 6.87    | -265.26 | -335.28 | 65.57   | -269.71 | -362.63 | 75.87   | -286.76 | -359.23 | 93.89   | -265.34 |

<sup>a</sup> in ppm.

**Table S35:** MO's contributions<sup>a</sup> to the  $\sigma^{\text{SO}}$  in terms of principal axis system ( $\sigma_{xx}$ ,  $\sigma_{yy}$ , and  $\sigma_{zz}$ ) for CX<sub>3</sub><sup>-</sup> (X = F, Cl, Br, or I) compounds.

| Contribution  | F       |         |       | Cl      |         |       | Br      |         |        | I       |         |         |
|---------------|---------|---------|-------|---------|---------|-------|---------|---------|--------|---------|---------|---------|
|               | occ-vac | occ-occ | total | occ-vac | occ-occ | total | occ-vac | occ-occ | total  | occ-vac | occ-occ | total   |
| $\sigma_{xx}$ | 1.37    | 0.90    | 2.27  | 1.26    | 2.69    | 3.95  | -7.58   | 8.31    | 0.73   | -84.39  | 13.42   | -70.97  |
| $\sigma_{yy}$ | 1.36    | 0.90    | 2.26  | 1.27    | 2.68    | 3.95  | -7.58   | 8.31    | 0.73   | -84.51  | 13.45   | -71.06  |
| $\sigma_{zz}$ | 2.54    | 0.99    | 3.53  | 2.77    | 2.71    | 5.48  | -25.93  | 11.26   | -14.68 | -266.79 | 26.92   | -239.87 |
| $\sigma$      | 1.76    | 0.93    | 2.69  | 1.77    | 2.69    | 4.46  | -13.70  | 9.29    | -4.40  | -145.23 | 17.93   | -127.30 |

<sup>a</sup> in ppm.

## 8 MSP contributions to the $\sigma^{\text{SO}}$ of iodine compounds

Table S36: Molecular spinor pair (MSP) contributions<sup>a</sup> to the  $\sigma^{\text{SO}}$  for  $\text{CHI}_3$ ,  $\text{Cl}_3^+$ , and  $\text{Cl}_3^-$ .

| MSP | $\text{CHI}_3$ | $\text{Cl}_3^+$ | $\text{Cl}_3^-$ | MSP          | $\text{CHI}_3$ | $\text{Cl}_3^+$ | $\text{Cl}_3^-$ |
|-----|----------------|-----------------|-----------------|--------------|----------------|-----------------|-----------------|
| 1   | 0.00           | 0.00            | 0.00            | 43           | -0.40          | -9.12           | -37.12          |
| 2   | 0.00           | 0.00            | 0.00            | 44           | 0.00           | 0.00            | 0.00            |
| 3   | 0.00           | 0.00            | 0.00            | 45           | 0.00           | 0.00            | 0.00            |
| 4   | 0.00           | 0.00            | 0.00            | 46           | 0.00           | 0.00            | 0.00            |
| 5   | 0.00           | 0.00            | 0.00            | 47           | 0.00           | 0.01            | 0.00            |
| 6   | 0.00           | 0.00            | 0.00            | 48           | 0.00           | 0.00            | 0.00            |
| 7   | 0.00           | 0.00            | 0.00            | 49           | 0.00           | 0.00            | 0.00            |
| 8   | 0.00           | 0.00            | 0.00            | 50           | -0.01          | -0.01           | 0.00            |
| 9   | 0.00           | 0.00            | 0.00            | 51           | -0.01          | -0.01           | 0.00            |
| 10  | 0.00           | 0.00            | 0.00            | 52           | -0.01          | -0.01           | 0.00            |
| 11  | 0.00           | 0.00            | 0.00            | 53           | 0.01           | 0.00            | 0.00            |
| 12  | 0.00           | 0.00            | 0.00            | 54           | 0.01           | 0.01            | 0.00            |
| 13  | 0.00           | 0.00            | 0.00            | 55           | 0.01           | 0.01            | 0.00            |
| 14  | 0.00           | 0.00            | 0.00            | 56           | -0.06          | -0.09           | -0.04           |
| 15  | 0.00           | 0.00            | 0.00            | 57           | -0.06          | -0.04           | -0.03           |
| 16  | 0.00           | 0.00            | 0.00            | 58           | 0.00           | -0.03           | 0.02            |
| 17  | 0.00           | 0.00            | 0.00            | 59           | 0.01           | 0.01            | 0.00            |
| 18  | 0.00           | 0.00            | 0.00            | 60           | 0.00           | 0.00            | 0.00            |
| 19  | 0.00           | 0.00            | 0.00            | 61           | 0.03           | 0.00            | 0.00            |
| 20  | 0.00           | 0.00            | 0.00            | 62           | 0.17           | 0.18            | 0.12            |
| 21  | 0.00           | 0.00            | 0.00            | 63           | 0.04           | 0.05            | 0.00            |
| 22  | 0.00           | 0.00            | 0.00            | 64           | -0.01          | 0.05            | 0.00            |
| 23  | 0.00           | 0.00            | 0.00            | 65           | 0.00           | -0.02           | -0.01           |
| 24  | 0.00           | 0.00            | 0.00            | 66           | -0.02          | -0.01           | -0.01           |
| 25  | 0.00           | 0.00            | 0.00            | 67           | -0.03          | -0.01           | -0.03           |
| 26  | 0.00           | 0.00            | 0.00            | 68           | 0.00           | 0.01            | 0.01            |
| 27  | 0.00           | 0.00            | 0.00            | 69           | 0.01           | 0.00            | 0.01            |
| 28  | 0.00           | 0.00            | 0.00            | 70           | 0.01           | 0.00            | 0.01            |
| 29  | 0.00           | 0.00            | 0.00            | 71           | 34.46          | 50.24           | 23.81           |
| 30  | 0.00           | 0.00            | 0.00            | 72           | 1.06           | 3.18            | 0.98            |
| 31  | 0.00           | 0.00            | 0.00            | 73           | -0.91          | -0.90           | -0.88           |
| 32  | 0.00           | 0.00            | 0.00            | 74           | 21.78          | 79.39           | 47.53           |
| 33  | 0.00           | 0.00            | 0.00            | 75           | 24.51          | 50.96           | 45.00           |
| 34  | 0.00           | 0.00            | 0.00            | 76           | 27.69          | -20.64          | 0.34            |
| 35  | 0.00           | 0.00            | 0.00            | 77           | -26.54         | -4.60           | -49.58          |
| 36  | 0.00           | 0.00            | 0.00            | 78           | 1.14           | 11.05           | -35.85          |
| 37  | 0.00           | 0.00            | 0.00            | 79           | -5.76          | 166.64          | -7.71           |
| 38  | 0.00           | 0.00            | 0.00            | 80           | 79.10          | -59.06          | 75.07           |
| 39  | 0.00           | 0.00            | 0.00            | 81           | 6.24           | -25.91          | -0.81           |
| 40  | 0.00           | 0.00            | 0.00            | 82           | 0.45           | 29.47           | 4.17            |
| 41  | 0.00           | 0.00            | 0.00            | 83           | 23.82          | -               | -210.26         |
| 42  | 0.00           | 0.00            | 0.00            | <b>Total</b> | 186.72         | 270.82          | -145.23         |

<sup>a</sup> in ppm.

## 9 NBO analyses

NBO analyses were performed using B1PW91/QZ4P level of theory, the COSMO solvent model, and SO-ZORA approach.

**Table S37:** Energies (in au) of valence NBO's for  $\text{CHX}_3$ ,  $\text{CX}_3^+$ , and  $\text{CX}_3^-$  ( $X = \text{F, Cl, Br, or I}$ ) compounds.

| NBO                     | Neutral ( $\text{CHX}_3$ ) |          |          |          | Cation ( $\text{CX}_3^+$ ) |          |          |          | Anion ( $\text{CX}_3^-$ ) |          |          |          |
|-------------------------|----------------------------|----------|----------|----------|----------------------------|----------|----------|----------|---------------------------|----------|----------|----------|
|                         | F                          | Cl       | Br       | I        | F                          | Cl       | Br       | I        | F                         | Cl       | Br       | I        |
| $\sigma_{\text{C-X}}$   | -0.66108                   | -0.44456 | -0.38831 | -0.33524 | -0.91825                   | -0.60345 | -0.52732 | -0.44645 | -0.47393                  | -0.30506 | -0.25778 | -0.21157 |
| $\sigma_{\text{C-H}}$   | -0.38315                   | -0.38231 | -0.37629 | -0.36291 | -                          | -        | -        | -        | -                         | -        | -        | -        |
| $\pi_{\text{C-X}}$      | -                          | -        | -        | -        | -0.40909                   | -0.30539 | -0.26731 | -0.22896 | -                         | -        | -        | -        |
| LP(C)                   | -                          | -        | -        | -        | -                          | -        | -        | -        | -0.08922                  | -0.15238 | -0.18091 | -0.18742 |
| LP <sub>1</sub> (X)     | -0.60820                   | -0.48942 | -0.47695 | -0.39400 | -0.73129                   | -0.57553 | -0.56089 | -0.47802 | -0.54634                  | -0.41863 | -0.41111 | -0.33933 |
| LP <sub>2</sub> (X)     | -0.16719                   | -0.16615 | -0.15529 | -0.15276 | -0.31157                   | -0.22642 | -0.19623 | -0.16860 | -0.07942                  | -0.11926 | -0.11195 | -0.10848 |
| LP <sub>3</sub> (X)     | -0.16735                   | -0.15335 | -0.13502 | -0.12100 | -0.32490                   | -0.23342 | -0.20194 | -0.17174 | -0.08012                  | -0.09504 | -0.08284 | -0.07638 |
| $\sigma_{\text{C-X}}^*$ | 0.37457                    | 0.19610  | 0.15631  | 0.11623  | 0.40226                    | 0.18896  | 0.19334  | 0.14725  | 0.38354                   | 0.22468  | 0.17657  | 0.17515  |
| $\sigma_{\text{C-H}}^*$ | 0.38540                    | 0.45297  | 0.49326  | 0.53740  | -                          | -        | -        | -        | -                         | -        | -        | -        |
| $\pi_{\text{C-X}}^*$    | -                          | -        | -        | -        | -0.14093                   | -0.14207 | -0.13322 | -0.12116 | -                         | -        | -        | -        |

**Table S38:** Occupancy of valence NBO's for  $\text{CHX}_3$ ,  $\text{CX}_3^+$ , and  $\text{CX}_3^-$  ( $X = \text{F, Cl, Br, or I}$ ) compounds.

| NBO                     | Neutral ( $\text{CHX}_3$ ) |         |         |         | Cation ( $\text{CX}_3^+$ ) |         |         |         | Anion ( $\text{CX}_3^-$ ) |         |         |         |
|-------------------------|----------------------------|---------|---------|---------|----------------------------|---------|---------|---------|---------------------------|---------|---------|---------|
|                         | F                          | Cl      | Br      | I       | F                          | Cl      | Br      | I       | F                         | Cl      | Br      | I       |
| $\sigma_{\text{C-X}}$   | 1.99561                    | 1.99259 | 1.99120 | 1.98882 | 1.99718                    | 1.99324 | 1.99008 | 1.98660 | 1.99332                   | 1.99127 | 1.99279 | 1.99305 |
| $\sigma_{\text{C-H}}$   | 1.99390                    | 1.99292 | 1.99377 | 1.99442 | -                          | -       | -       | -       | -                         | -       | -       | -       |
| $\pi_{\text{C-X}}$      | -                          | -       | -       | -       | 1.99913                    | 1.99792 | 1.99834 | 1.99736 | -                         | -       | -       | -       |
| LP(C)                   | -                          | -       | -       | -       | -                          | -       | -       | -       | 1.99358                   | 1.98137 | 1.98767 | 1.98695 |
| LP <sub>1</sub> (X)     | 1.99283                    | 1.99607 | 1.99651 | 1.99633 | 1.98691                    | 1.98720 | 1.98629 | 1.98341 | 1.99410                   | 1.99694 | 1.99705 | 1.99690 |
| LP <sub>2</sub> (X)     | 1.95226                    | 1.96052 | 1.96299 | 1.96552 | 1.92900                    | 1.92823 | 1.93274 | 1.94095 | 1.97081                   | 1.96931 | 1.96463 | 1.95834 |
| LP <sub>3</sub> (X)     | 1.94028                    | 1.94962 | 1.95431 | 1.96215 | 1.79797                    | 1.70149 | 1.68400 | 1.65292 | 1.95761                   | 1.96397 | 1.96518 | 1.96798 |
| $\sigma_{\text{C-X}}^*$ | 0.08545                    | 0.07110 | 0.06822 | 0.06110 | 0.07311                    | 0.07447 | 0.07487 | 0.07222 | 0.06872                   | 0.06405 | 0.06593 | 0.06665 |
| $\sigma_{\text{C-H}}^*$ | 0.05907                    | 0.04121 | 0.03574 | 0.03247 | -                          | -       | -       | -       | -                         | -       | -       | -       |
| $\pi_{\text{C-X}}^*$    | -                          | -       | -       | -       | 0.39185                    | 0.57784 | 0.61549 | 0.67939 | -                         | -       | -       | -       |



**Table S39:** Atomic hybrid contributions of carbon (in %) in the main NBO's for CHX<sub>3</sub>, CX<sub>3</sub><sup>+</sup>, and CX<sub>3</sub><sup>-</sup> (X = F, Cl, Br, or I) compounds.

| NBO              | Neutral (CHX <sub>3</sub> ) |       |       |       | Cation (CX <sub>3</sub> <sup>+</sup> ) |       |       |       | Anion (CX <sub>3</sub> <sup>-</sup> ) |       |       |       |
|------------------|-----------------------------|-------|-------|-------|----------------------------------------|-------|-------|-------|---------------------------------------|-------|-------|-------|
|                  | F                           | Cl    | Br    | I     | F                                      | Cl    | Br    | I     | F                                     | Cl    | Br    | I     |
| $\sigma_{C-X}$   | 28.47                       | 47.60 | 51.23 | 56.65 | 29.33                                  | 50.76 | 54.85 | 60.42 | 23.90                                 | 37.18 | 38.87 | 43.06 |
| $\sigma_{C-H}$   | 58.16                       | 63.95 | 63.86 | 63.21 | -                                      | -     | -     | -     | -                                     | -     | -     | -     |
| $\pi_{C-X}$      | -                           | -     | -     | -     | 12.51                                  | 20.90 | 22.77 | 26.21 | -                                     | -     | -     | -     |
| $\sigma_{C-X}^*$ | 71.53                       | 52.40 | 48.77 | 43.35 | 70.67                                  | 49.24 | 45.15 | 39.58 | 76.10                                 | 62.82 | 61.13 | 56.94 |
| $\sigma_{C-H}^*$ | 41.84                       | 36.05 | 36.14 | 36.79 | -                                      | -     | -     | -     | -                                     | -     | -     | -     |
| $\pi_{C-X}^*$    | -                           | -     | -     | -     | 87.49                                  | 79.10 | 77.23 | 73.79 | -                                     | -     | -     | -     |

**Table S40:** The *s* character of valence NBO's for CHX<sub>3</sub>, CX<sub>3</sub><sup>+</sup>, and CX<sub>3</sub><sup>-</sup> (X = F, Cl, Br, or I) compounds.

| NBO                 | Neutral (CHX <sub>3</sub> ) |       |       |       | Cation (CX <sub>3</sub> <sup>+</sup> ) |       |       |       | Anion (CX <sub>3</sub> <sup>-</sup> ) |       |       |       |
|---------------------|-----------------------------|-------|-------|-------|----------------------------------------|-------|-------|-------|---------------------------------------|-------|-------|-------|
|                     | F                           | Cl    | Br    | I     | F                                      | Cl    | Br    | I     | F                                     | Cl    | Br    | I     |
| $\sigma_{C-X}^a$    | 22.74                       | 23.27 | 23.03 | 23.03 | 33.30                                  | 33.19 | 33.16 | 33.16 | 14.76                                 | 10.46 | 8.04  | 6.56  |
| $\sigma_{C-H}^a$    | 32.23                       | 30.12 | 30.81 | 30.82 | -                                      | -     | -     | -     | -                                     | -     | -     | -     |
| $\pi_{C-X}^a$       | -                           | -     | -     | -     | 0.00                                   | 0.00  | 0.00  | 0.00  | -                                     | -     | -     | -     |
| LP(C)               | -                           | -     | -     | -     | -                                      | -     | -     | -     | 60.19                                 | 69.50 | 76.35 | 80.44 |
| LP <sub>1</sub> (X) | 73.65                       | 82.95 | 84.45 | 81.19 | 72.07                                  | 84.16 | 88.13 | 89.97 | 75.84                                 | 80.01 | 81.56 | 78.84 |
| LP <sub>2</sub> (X) | 0.08                        | 3.33  | 5.29  | 10.11 | 0.00                                   | 0.00  | 0.00  | 0.00  | 0.00                                  | 6.06  | 7.35  | 10.59 |
| LP <sub>3</sub> (X) | 0.00                        | 0.00  | 0.00  | 0.00  | 0.00                                   | 0.00  | 0.00  | 0.00  | 0.00                                  | 0.00  | 0.00  | 0.00  |
| $\sigma_{C-X}^{*a}$ | 22.74                       | 23.27 | 23.03 | 23.03 | 33.30                                  | 33.19 | 33.16 | 33.16 | 14.76                                 | 10.46 | 8.04  | 6.56  |
| $\sigma_{C-H}^{*a}$ | 32.23                       | 30.12 | 30.81 | 30.82 | -                                      | -     | -     | -     | -                                     | -     | -     | -     |
| $\pi_{C-X}^{*a}$    | -                           | -     | -     | -     | 0.00                                   | 0.00  | 0.00  | 0.00  | -                                     | -     | -     | -     |

<sup>a</sup> Values refer to *s* character of carbon atom in the hybrid orbital.

# 10 $^{13}\text{C}$ NMR Spectra

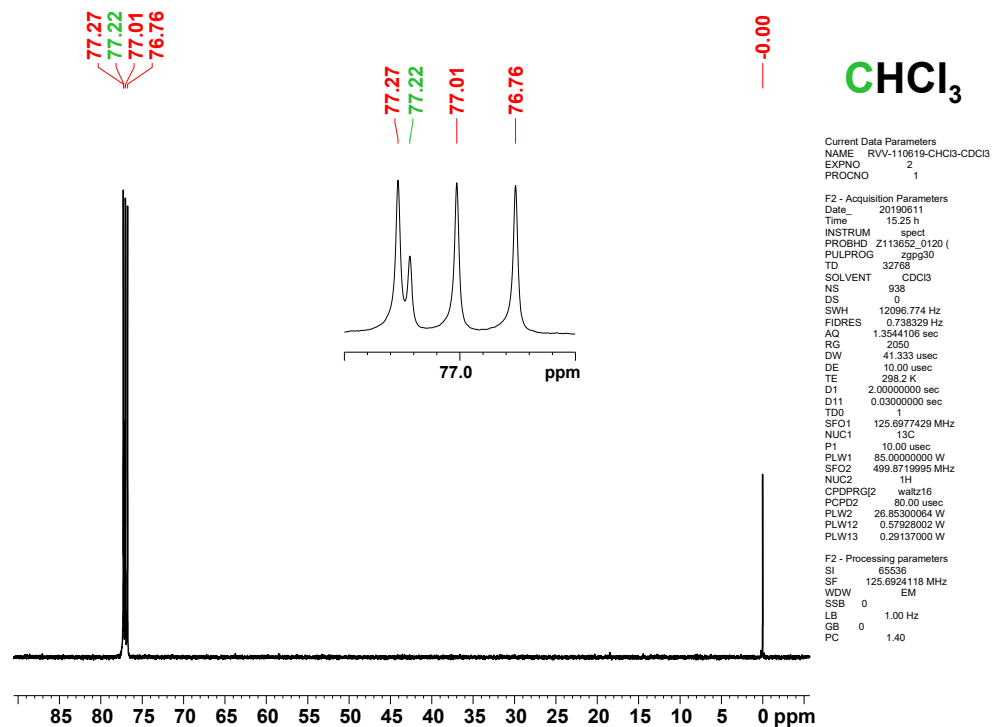

Figure S2:  $^{13}\text{C}$  NMR spectrum of trichloromethane recorded at 125.7 MHz in  $\text{CDCl}_3$ .

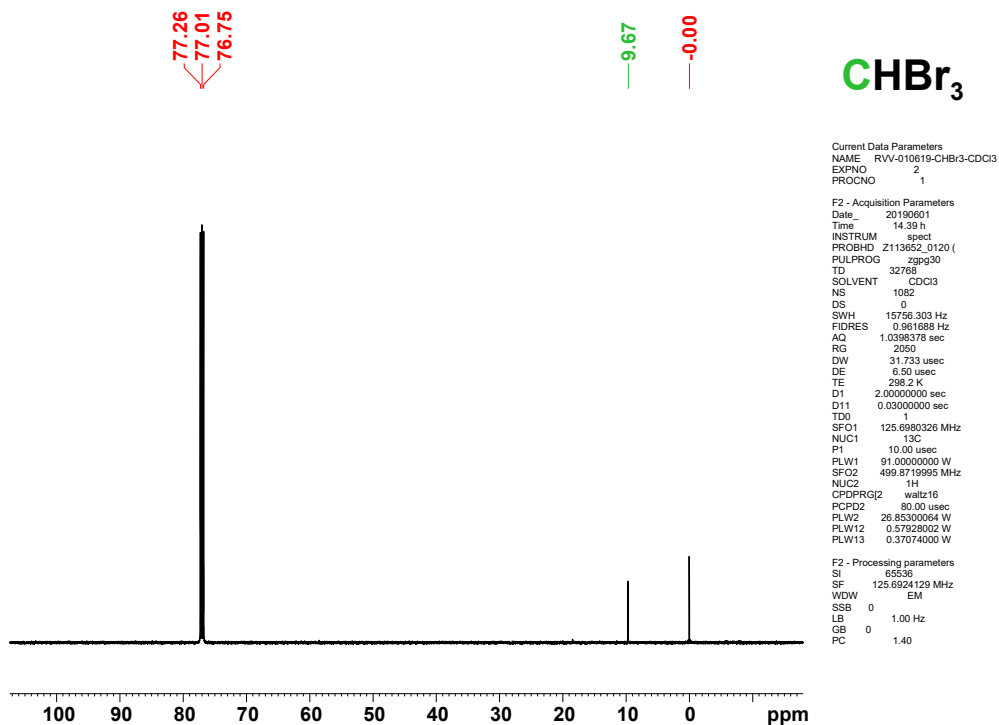

Figure S3:  $^{13}\text{C}$  NMR spectrum of tribromomethane recorded at 125.7 MHz in  $\text{CDCl}_3$ .

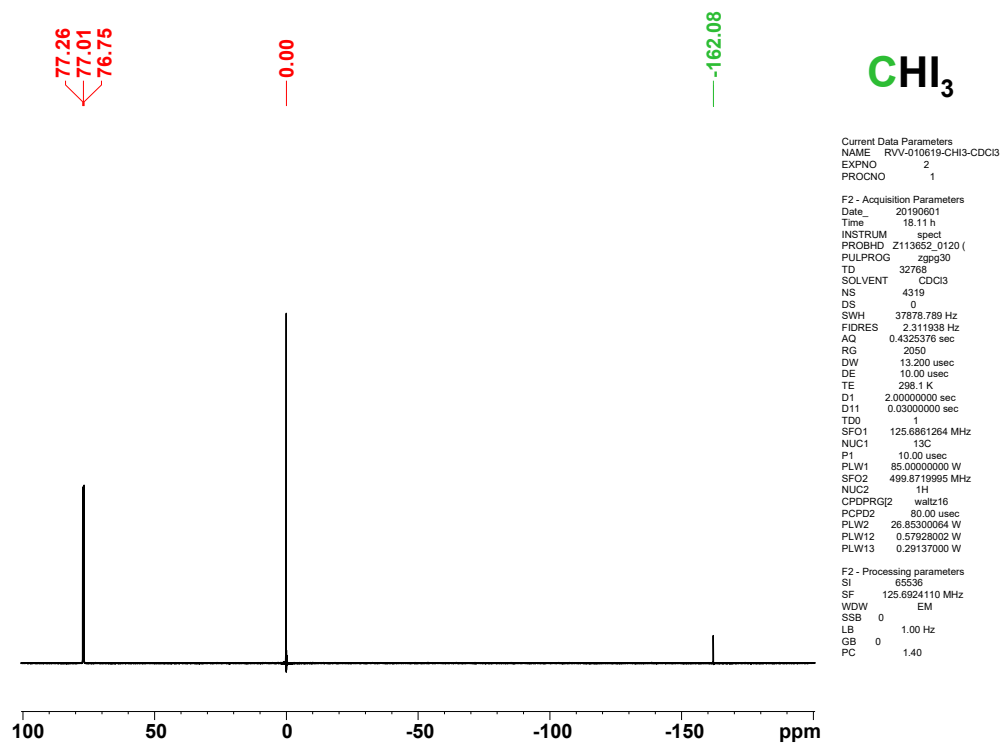

**Figure S4:**  $^{13}\text{C}$  NMR spectrum of triiodomethane recorded at 125.7 MHz in  $\text{CDCl}_3$ .

## References

- [1] A. Antušek, K. Jackowski, M. Jaszuński, W. Makulski and M. Wilczek, *Chem. Phys. Lett.*, 2005, **411**, 111-116.
- [2] G. K. S. Prakash, F. Wang, Z. Zhang, R. Haiges, M. Rahm, K. O. Christe, T. Mathew and G. A. Olah, *Angew. Chem. Int. Ed.*, 2014, **53**, 11575-11578.
- [3] G. A. Olah, G. Rasul, L. Heiliger and G. K. S. Prakash, *J. Am. Chem. Soc.*, 1996, **118**, 3580-3583.
